# Supplementary material
Source: PubMed Central journal article supplement (PMC5719866)
Supplement: NIHMS921429-supplement-Supp_info.pdf [file NIHMS921429-supplement-Supp_info.pdf]

1 **SUPPLEMENTAL MATERIALS**

2  
3 **Absence of the KhpA and KhpB (JAG/EloR) RNA-Binding**  
4 **Proteins Suppresses the Requirement for PBP2b by**  
5 **Overproduction of FtsA in *Streptococcus pneumoniae* D39**  
6

7 **Jiaqi J. Zheng<sup>1</sup>, Amilcar J. Perez<sup>1</sup>, Ho-Ching Tiffany Tsui<sup>1\*</sup>, Orietta Massidda<sup>2</sup>, and**  
8 **Malcolm E. Winkler<sup>1\*</sup>**  
9

10 <sup>1</sup>Department of Biology, Indiana University Bloomington (IUB), Bloomington, IN 47405  
11 USA <sup>2</sup>Dipartimento di Scienze Chirurgiche, Università di Cagliari, 09100 Cagliari, Italy  
12

13 \*Corresponding author:  
14 Malcolm E. Winkler  
15 Phone: 812-856-1318  
16 E-mail: winklerm@indiana.edu  
17

18 \*Co-corresponding author  
19 Ho-Ching Tiffany Tsui  
20 Phone: 812-856-1781  
21 E-mail: ttttsui@indiana.edu  
22

23 **SUPPLEMENTAL TABLES**

24 **Table S1.** *Streptococcus pneumoniae* strains and oligonucleotide primers used in  
25 this study

26 **Table S2.** Spontaneous suppressor mutations in D39  $\Delta cps \Delta pbp2b$  strains identified  
27 by Illumina whole-genome or conventional sequencing

28 **Table S3.** mRNA-Seq results for a  $\Delta khpA$  mutant

29 **Table S4.** Because of its size, “**Table S4.** RNAs pulled down by KhpA or KhpB in RIP-  
30 Seq experiments” is appended to the end of the Supplemental Materials.  
31

32 **SUPPLEMENTAL FIGURE LEGENDS.**

33 **Fig. S1.** Model of PG biosynthesis in ovococcus bacteria, such as *S. pneumoniae*,  
34 and topology of proteins involved in peripheral PG synthesis.

35 **Fig. S2.** KhpA and KhpB are conserved in important Gram-positive pathogenic  
36 bacteria.

37 **Fig. S3.**  $\Delta khpA$  reduces growth rate and cell size of encapsulated D39 and TIGR4  
38 *Streptococcus pneumoniae* strains.

39 **Fig. S4.** The *mltG*(Y488D)  $\Delta khpA$  double mutant grows slower than either *mltG*(Y488D)  
40 or  $\Delta khpA$  single mutant.

41 **Fig. S5.**  $\Delta khpA$  suppresses  $\Delta pbp2b$ ,  $\Delta mreCD$ ,  $\Delta rodZ$ ,  $\Delta rodA$ , and  $\Delta gpsB$  mutations in  
42 the D39 genetic background.

43 **Fig. S6.** Absence of growth and morphology defects of strains expressing KhpA-L-  
44 FLAG<sup>3</sup> or KhpB-L-FLAG<sup>3</sup> from their native chromosomal loci.

45 **Fig. S7.** Similar growth and cell morphology of the  $\Delta khpA \Delta khpB$  double and  $\Delta khpA$   
46  $\Delta khpB \Delta pbp2b$  triple mutants.

47 **Fig. S8.** KhpA and KhpB co-localize at all stages of the bacterial cell cycle.

48 **Fig. S9.** Protein phosphorylation is reduced slightly in  $\Delta khpA$ ,  $\Delta khpA$ , and  $\Delta khpA$   
49  $\Delta khpB$  mutants.

50 **Fig. S10.** Phosphoablative and phosphomimetic amino acid changes of KhpB at Thr89  
51 (see Fig. 1B) does not affect growth and cell morphology.

52 **Fig. S11.** Amino acid changes in the KhpA(GXXG) motif destabilizes KhpA and results  
53 in a  $\Delta khpA$  phenotype.

54 **Fig. S12.** RIP-qRT-PCR control confirms results and specificity of RIP-Seq  
55 experiments.

56 **Fig. S13.** FtsA is overproduced in the  $\Delta pbp2b sup6$  strain.

57 **Fig. S14.** Relative cellular amount of FtsZ is increased by  $\approx 1.9$ -fold by ectopic  
58 overexpression.

59 **Fig. S15.** Ectopic overexpression of *ftsA* does not change relative cellular FtsZ  
60 amount.

61 **Fig. S16.** FtsA overproduction partially contributed to the phenotypes of  $\Delta khpA$   
62 mutant.

63 **Fig. S17.** Linearity of signal intensity in Western blots versus protein amount in  
64 lysates.

65 **Fig. 18.** JBrowse profile illustrating enrichment of mRNA near the 5'-UTR and start  
66 codon of *ftsA* and mRNA of *sepF* by KhpA-L-FLAG<sup>3</sup> or KhpB-L-FLAG<sup>3</sup> pull down in  
67 RIP-Seq experiments compared to the wild-type (WT) control strain, which does not  
68 express a FLAG<sup>3</sup>-tagged protein.

69 **Fig. 19.**  $\Delta khpA$  and  $\Delta khpB$  mutants are slightly more resistant to gentamicin, but have  
70 the same sensitivities to  $\beta$ -lactam antibiotics or tetracycline as the wild-type (WT)  
71 strain.

72 **Fig. S20.** The  $\Delta khpA \Delta walk$  double mutant grows slower than either  $\Delta walk$  or  $\Delta khpA$   
73 single mutant.

74 **Fig. S21.** KhpB overproduction does not alter growth and cell morphology of D39-  
75 derived strains.

## 76 SUPPLEMENTAL REFERENCES

77  
78  
79 **Table S4.** RNAs pulled down by KhpA or KhpB in RIP-Seq experiments  
80

**Table S1.** *Streptococcus pneumoniae* strains and oligonucleotide primers used in this study

| <b>Strains used in this study</b> |                                                                                                                                                                                                                                                                                                                       |                                    |                            |
|-----------------------------------|-----------------------------------------------------------------------------------------------------------------------------------------------------------------------------------------------------------------------------------------------------------------------------------------------------------------------|------------------------------------|----------------------------|
| Strain number                     | Genotype (description) <sup>a</sup>                                                                                                                                                                                                                                                                                   | Antibiotic resistance <sup>b</sup> | Reference or source        |
| IU1690                            | D39 <i>cps</i> <sup>+</sup>                                                                                                                                                                                                                                                                                           | None                               | Lanie <i>et al.</i> , 2007 |
| IU1824 <sup>c</sup>               | D39 <i>rpsL1</i> $\Delta$ <i>cps2A'</i> - <i>cps2H'</i> = D39 <i>rpsL1</i> $\Delta$ <i>cps</i>                                                                                                                                                                                                                        | Str <sup>R</sup>                   | Lanie <i>et al.</i> , 2007 |
| IU1945                            | D39 $\Delta$ <i>cps2A'</i> - <i>cps2H'</i> = D39 $\Delta$ <i>cps</i>                                                                                                                                                                                                                                                  | None                               | Lanie <i>et al.</i> , 2007 |
| E217                              | D39 $\Delta$ <i>cps</i> $\Delta$ <i>walkK</i> ::P <sub>c</sub> - <i>erm</i>                                                                                                                                                                                                                                           | Erm <sup>R</sup>                   | Wayne <i>et al.</i> , 2010 |
| K751                              | D39 $\Delta$ <i>cps</i> $\Delta$ <i>khpA</i> ::P <sub>c</sub> -[ <i>kan-rpsL</i> <sup>+</sup> ] (IU1945 X fusion $\Delta$ <i>khpA</i> ::P <sub>c</sub> -[ <i>kan-rpsL</i> <sup>+</sup> ])                                                                                                                             | Kan <sup>R</sup>                   | This study                 |
| E751                              | D39 $\Delta$ <i>cps</i> $\Delta$ <i>khpA</i> ::P <sub>c</sub> - <i>erm</i> (IU1945 X fusion $\Delta$ <i>khpA</i> ::P <sub>c</sub> - <i>erm</i> )                                                                                                                                                                      | Erm <sup>R</sup>                   | This study                 |
| K761                              | D39 $\Delta$ <i>cps</i> $\Delta$ <i>khpB</i> ::P <sub>c</sub> -[ <i>kan-rpsL</i> <sup>+</sup> ] (IU1945 X fusion $\Delta$ <i>khpB</i> ::P <sub>c</sub> -[ <i>kan-rpsL</i> <sup>+</sup> ])                                                                                                                             | Kan <sup>R</sup>                   | This study                 |
| IU4888                            | D39 $\Delta$ <i>cps</i> $\Delta$ <i>gpsB</i> <> <i>aad9</i> // $\Delta$ <i>bgaA</i> :: <i>kan-t1t2</i> -P <sub><i>fcsK</i></sub> - <i>gpsB</i> <sup>+</sup>                                                                                                                                                           | Kan <sup>R</sup> Spc <sup>R</sup>  | Land <i>et al.</i> , 2013  |
| IU4970                            | D39 $\Delta$ <i>cps</i> <i>mreC</i> -L-FLAG <sup>3</sup> -P <sub>c</sub> - <i>erm</i>                                                                                                                                                                                                                                 | Erm <sup>R</sup>                   | Land <i>et al.</i> , 2011  |
| IU5557                            | D39 $\Delta$ <i>cps</i> $\Delta$ <i>bgaA</i> :: <i>kan-t1t2</i> -P <sub><i>fcsK</i></sub> - <i>ftsZ</i> <sup>+</sup> (IU1945 transformed with fusion amplicon, $\Delta$ <i>bgaA</i> :: <i>kan-t1t2</i> -P <sub><i>fcsK</i></sub> - <i>ftsZ</i> <sup>+</sup> )                                                         | Kan <sup>R</sup>                   | This Study                 |
| IU5809                            | D39 $\Delta$ <i>cps</i> <i>spd</i> <sub>1366</sub> -L-FLAG <sup>3</sup> -P <sub>c</sub> - <i>erm</i> (IU1945 X fusion <i>spd</i> <sub>1366</sub> -L-FLAG <sup>3</sup> -P <sub>c</sub> - <i>erm</i> )                                                                                                                  | Erm <sup>R</sup>                   | This study                 |
| IU6397                            | D39 <i>rpsL1</i> $\Delta$ <i>phoU2</i> $\Delta$ <i>bgaA</i> :: <i>kan-T1T2</i> -P <sub><i>ftsA</i></sub> - <i>phoU2</i> <sup>+</sup>                                                                                                                                                                                  | Str <sup>R</sup> Kan <sup>R</sup>  | Zheng <i>et al.</i> , 2016 |
| IU6741                            | D39 <i>rpsL1</i> $\Delta$ <i>pbp1a</i>                                                                                                                                                                                                                                                                                | Str <sup>R</sup> Kan <sup>S</sup>  | Tsui <i>et al.</i> , 2016  |
| IU7054                            | D39 $\Delta$ <i>cps</i> $\Delta$ <i>bgaA</i> :: <i>kan-t1t2</i> -P <sub><i>ftsA</i></sub> -RBS <sup><i>ftsA</i></sup> - <i>ftsZ</i> <sup>+</sup> (IU1945 transformed with fusion amplicon, $\Delta$ <i>bgaA</i> :: <i>kan-t1t2</i> -P <sub><i>ftsA</i></sub> -RBS <sup><i>ftsA</i></sup> - <i>ftsZ</i> <sup>+</sup> ) | Kan <sup>R</sup>                   | This Study                 |
| IU7397                            | D39 $\Delta$ <i>cps</i> $\Delta$ <i>pbp2b</i> <> <i>aad9</i> // $\Delta$ <i>bgaA</i> :: <i>kan-t1t2</i> -P <sub><i>fcsK</i></sub> - <i>pbp2b</i> <sup>+</sup>                                                                                                                                                         | Kan <sup>R</sup> Spc <sup>R</sup>  | Tsui <i>et al.</i> , 2014  |
| IU7476                            | D39 $\Delta$ <i>cps</i> $\Delta$ <i>pbp2b</i> <> <i>aad9</i> <i>sup1</i> (IU1945 X $\Delta$ <i>pbp2b</i> <> <i>aad9</i> from IU7397)                                                                                                                                                                                  | Spc <sup>R</sup>                   | This study                 |
| IU7814                            | D39 $\Delta$ <i>cps</i> $\Delta$ <i>ftsZ</i> :: <i>aad9</i> // <i>bgaA</i> ':: <i>kan-t1t2</i> -P <sub><i>ftsA</i></sub> -RBS <sup><i>ftsA</i></sup> - <i>ftsZ</i> <sup>+</sup> (IU7054 transformed with fusion amplicon, $\Delta$ <i>ftsZ</i> :: <i>aad9</i> )                                                       | Kan <sup>R</sup> Spc <sup>R</sup>  | This Study                 |
| IU7915                            | D39 $\Delta$ <i>cps</i> <i>rpsL1</i> $\Delta$ <i>khpA</i> ::P <sub>c</sub> -[ <i>kan-rpsL</i> <sup>+</sup> ] (IU1824 X $\Delta$ <i>khpA</i> ::P <sub>c</sub> -[ <i>kan-rpsL</i> <sup>+</sup> ] from K751)                                                                                                             | Kan <sup>R</sup> Str <sup>S</sup>  | This study                 |
|                                   |                                                                                                                                                                                                                                                                                                                       |                                    |                            |

|         |                                                                                                                                                                                                                             |                                                       |                              |
|---------|-----------------------------------------------------------------------------------------------------------------------------------------------------------------------------------------------------------------------------|-------------------------------------------------------|------------------------------|
| IU7942  | D39 $\Delta cps$ <i>rpsL1 khpA</i> ( $\Delta A$ at K71) (IU7915 X <i>khpA</i> ( $\Delta A$ at K71) from IU7476)                                                                                                             | Kan <sup>S</sup> Str <sup>R</sup>                     | This study                   |
| IU8011  | D39 $\Delta cps$ <i>rpsL1 khpA</i> ( $\Delta A$ at K71) $\Delta pbp2b$ <> <i>aad9</i> (IU7942 X $\Delta pbp2b$ <> <i>aad9</i> from IU7397)                                                                                  | Kan <sup>S</sup> Str <sup>R</sup><br>Spc <sup>R</sup> | This study                   |
| IU8122  | D39 $\Delta cps$ $\Delta bgaA::tet$ -P <sub>Zn</sub> -RBS <sup><i>ftsA</i></sup> - <i>ftsZ</i> <sup>+</sup> (IU1945 X fusion $\Delta bgaA::tet$ -P <sub>Zn</sub> - <i>ftsZ</i> <sup>+</sup> )                               | Tet <sup>R</sup>                                      | This study                   |
| IU8872  | D39 $\Delta cps$ $\Delta bgaA::tet$ -P <sub>Zn</sub> -RBS <sup><i>mltG</i></sup> - <i>mltG</i> <sup>+</sup>                                                                                                                 | Tet <sup>R</sup>                                      | Tsui <i>et al.</i> ,<br>2016 |
| IU9036  | D39 $\Delta cps$ <i>rpsL1</i> $\Delta khpA$ (IU7915 X fusion $\Delta khpA$ )                                                                                                                                                | Kan <sup>S</sup> Str <sup>R</sup>                     | This study                   |
| IU9600  | D39 $\Delta khpA::P_c$ - <i>erm</i> (IU1690 X $\Delta khpA::P_c$ - <i>erm</i> from E751)                                                                                                                                    | Erm <sup>R</sup>                                      | This study                   |
| IU9602  | D39 $\Delta cps$ <i>khpA</i> -L-FLAG <sup>3</sup> - <i>P_c</i> - <i>erm</i> (IU1945 X fusion <i>khpA</i> -L-FLAG <sup>3</sup> - <i>P_c</i> - <i>erm</i> )                                                                   | Erm <sup>R</sup>                                      | This study                   |
| IU9621  | D39 $\Delta cps$ <i>rpsL1</i> $\Delta khpA$ // $\Delta bgaA::kan$ -t1t2-P <sub><i>ftsA</i></sub> - <i>khpA</i> <sup>+</sup> (IU9036 X fusion $\Delta bgaA::kan$ -t1t2-P <sub><i>ftsA</i></sub> - <i>khpA</i> <sup>+</sup> ) | Str <sup>R</sup> Kan <sup>R</sup>                     | This study                   |
| IU9697  | D39 $\Delta cps$ <i>rpsL1</i> <i>khpA</i> -L-FLAG <sup>3</sup> (IU7915 X fusion <i>khpA</i> -L-FLAG <sup>3</sup> )                                                                                                          | Str <sup>R</sup> Kan <sup>S</sup>                     | This study                   |
| IU9760  | D39 $\Delta cps$ <i>rpsL1</i> <i>mltG</i> (Y488D)                                                                                                                                                                           | Str <sup>R</sup> Kan <sup>S</sup>                     | Tsui <i>et al.</i> ,<br>2016 |
| IU9763  | D39 $\Delta cps$ <i>rpsL1</i> $\Delta khpA$ $\Delta pbp2b$ <> <i>aad9</i> (IU9036 X $\Delta pbp2b$ <> <i>aad9</i> from IU7397)                                                                                              | Kan <sup>S</sup> Str <sup>R</sup><br>Spc <sup>R</sup> | This study                   |
| IU9767  | D39 $\Delta cps$ <i>rpsL1</i> P <sub>c</sub> -[ <i>kan-rpsL</i> <sup>+</sup> ]- <i>ftsA</i> <sup>+</sup>                                                                                                                    | Kan <sup>R</sup> Str <sup>S</sup>                     | Mura <i>et al.</i> ,<br>2017 |
| IU9935  | D39 $\Delta cps$ <i>rpsL1</i> <i>khpA</i> (G49A) (IU7915 X fusion <i>khpA</i> (G49A) amplicon)                                                                                                                              | Kan <sup>S</sup> Str <sup>R</sup>                     | This study                   |
| IU9937  | D39 $\Delta cps$ <i>rpsL1</i> <i>khpA</i> (G52A) (IU7915 X fusion <i>khpA</i> (G52A) amplicon)                                                                                                                              | Kan <sup>S</sup> Str <sup>R</sup>                     | This study                   |
| IU9939  | D39 $\Delta cps$ <i>rpsL1</i> <i>khpA</i> (G49A)-L-FLAG <sup>3</sup> (IU7915 X fusion <i>khpA</i> (G49A)-L-FLAG <sup>3</sup> amplicon)                                                                                      | Kan <sup>S</sup> Str <sup>R</sup>                     | This study                   |
| IU9941  | D39 $\Delta cps$ <i>rpsL1</i> <i>khpA</i> (G52A)-L-FLAG <sup>3</sup> (IU7915 X fusion <i>khpA</i> (G52A)-L-FLAG <sup>3</sup> amplicon)                                                                                      | Kan <sup>S</sup> Str <sup>R</sup>                     | This study                   |
| IU9977  | D39 $\Delta cps$ <i>rpsL1</i> <i>khpA</i> (G49A G52A) (IU7915 X fusion <i>khpA</i> (G49A G52A) amplicon)                                                                                                                    | Kan <sup>S</sup> Str <sup>R</sup>                     | This study                   |
| IU9979  | D39 $\Delta cps$ <i>rpsL1</i> <i>khpA</i> (G49A G52A)-L-FLAG <sup>3</sup> (IU7915 X fusion <i>khpA</i> (G49A G52A)-L-FLAG <sup>3</sup> amplicon)                                                                            | Kan <sup>S</sup> Str <sup>R</sup>                     | This study                   |
| IU9990  | D39 $\Delta cps$ $\Delta bgaA::tet$ -P <sub>Zn</sub> -RBS <sup><i>ftsA</i></sup> - <i>pbp2b</i> <sup>+</sup> (IU1945 X fusion $\Delta bgaA::tet$ -P <sub>Zn</sub> -RBS <sup><i>ftsA</i></sup> - <i>pbp2b</i> <sup>+</sup> ) | Tet <sup>R</sup>                                      | This study                   |
| IU10080 | D39 $\Delta cps$ <i>rpsL1</i> $\Delta khpA$ $\Delta walk::P_c$ - <i>erm</i> (IU9036 X $\Delta walk::P_c$ - <i>erm</i> from E217)                                                                                            | Erm <sup>R</sup>                                      | This study                   |

|         |                                                                                                                                                                          |                                                       |                               |
|---------|--------------------------------------------------------------------------------------------------------------------------------------------------------------------------|-------------------------------------------------------|-------------------------------|
| IU10091 | D39 $\Delta cps$ <i>rpsL1 khpA</i> (R50D K51D) (IU7915 X fusion <i>khpA</i> (R50D K51D) amplicon)                                                                        | Kan <sup>S</sup> Str <sup>R</sup>                     | This study                    |
| IU10092 | D39 $\Delta cps$ <i>rpsL1 khpA</i> (R50D K51D)-L-FLAG <sup>3</sup> (IU7915 X fusion <i>khpA</i> (R50D K51D)-L-FLAG <sup>3</sup> amplicon)                                | Kan <sup>S</sup> Str <sup>R</sup>                     | This study                    |
| IU10230 | D39 $\Delta cps$ <i>rpsL1 \Delta walk::P<sub>c</sub>-erm</i> (IU1824 X $\Delta walk::Pc-erm$ from E217)                                                                  | Erm <sup>R</sup>                                      | This study                    |
| IU10560 | D39 $\Delta cps$ <i>rpsL1 \Delta khpB::P<sub>c</sub>-[kan-rpsL<sup>+</sup>]</i> (IU1824 X $\Delta khpB::Pc-[kan-rpsL+]$ from K761)                                       | Kan <sup>R</sup> Str <sup>S</sup>                     | This study                    |
| IU10562 | D39 $\Delta cps$ <i>rpsL1 \Delta khpA \Delta khpB::P<sub>c</sub>-[kan-rpsL<sup>+</sup>]</i> (IU9036 X $\Delta khpB::Pc-[kan-rpsL+]$ from K761)                           | Kan <sup>R</sup> Str <sup>S</sup>                     | This study                    |
| IU10564 | D39 $\Delta cps$ <i>rpsL1 khpA-L-FLAG<sup>3</sup> \Delta khpB::P<sub>c</sub>-[kan-rpsL<sup>+</sup>]</i> (IU9697 X $\Delta khpB::Pc-[kan-rpsL+]$ from K761)               | Str <sup>S</sup> Kan <sup>R</sup>                     | This study                    |
| IU10592 | D39 $\Delta cps$ <i>rpsL1 \Delta khpB</i> (IU10560 X fusion $\Delta khpB$ )                                                                                              | Kan <sup>S</sup> Str <sup>R</sup>                     | This study                    |
| IU10594 | D39 $\Delta cps$ <i>rpsL1 khpB-HA</i> (IU10560 X fusion <i>khpB-HA</i> )                                                                                                 | Kan <sup>S</sup> Str <sup>R</sup>                     | This study                    |
| IU10596 | D39 $\Delta cps$ <i>rpsL1 \Delta khpA \Delta khpB</i> (IU10562 X fusion $\Delta khpB$ )                                                                                  | Kan <sup>S</sup> Str <sup>R</sup>                     | This study                    |
| IU10602 | D39 $\Delta cps$ <i>rpsL1 khpA-L-F<sup>3</sup> khpB-HA</i> (IU10564 X <i>khpB-HA</i> from IU10594)                                                                       | Kan <sup>S</sup> Str <sup>R</sup>                     | This study                    |
| IU10624 | D39 $\Delta cps$ <i>rpsL1 \Delta khpB \Delta pbp2b&lt;&gt;aad9</i> (IU10592 X $\Delta pbp2b<>aad9$ from IU7397)                                                          | Kan <sup>S</sup> Str <sup>R</sup><br>Spc <sup>R</sup> | This study                    |
| IU10626 | D39 $\Delta cps$ <i>rpsL1 \Delta khpA \Delta khpB \Delta pbp2b&lt;&gt;aad9</i> (IU10596 X $\Delta pbp2b<>aad9$ from IU7397)                                              | Kan <sup>S</sup> Str <sup>R</sup><br>Spc <sup>R</sup> | This study                    |
| IU10651 | D39 $\Delta cps$ <i>pbp1a<sup>+</sup> mltG(Y488D) \Delta mreCD&lt;&gt;aad9</i>                                                                                           | Str <sup>R</sup> Kan <sup>S</sup><br>Spc <sup>R</sup> | Tsui <i>et al.</i> , 2016     |
| IU10656 | D39 $\Delta cps$ <i>pbp1a<sup>+</sup> mltG(Y488D) \Delta rodZ(spdl_2050)&lt;&gt;aad9</i>                                                                                 | Str <sup>R</sup> Kan <sup>S</sup><br>Spc <sup>R</sup> | Tsui <i>et al.</i> , 2016     |
| IU10657 | D39 $\Delta cps$ <i>rpsL1 \Delta khpA \Delta mreCD&lt;&gt;aad9</i> (IU9036 X $\Delta mreCD<>aad9$ from IU10651)                                                          | Kan <sup>S</sup> Str <sup>R</sup><br>Spc <sup>R</sup> | This study                    |
| IU10659 | D39 $\Delta cps$ <i>rpsL1 \Delta khpA \Delta rodZ&lt;&gt;aad9</i> (IU9036 X $\Delta rodZ<>aad9$ from IU10657)                                                            | Kan <sup>S</sup> Str <sup>R</sup><br>Spc <sup>R</sup> | This study                    |
| IU10664 | D39 $\Delta cps$ <i>khpB-L-FLAG<sup>3</sup>-P<sub>c</sub>-erm</i> (IU1945 X fusion <i>khpB-L-FLAG<sup>3</sup>-P<sub>c</sub>-erm</i> )                                    | Erm <sup>R</sup>                                      | This study                    |
| IU10943 | D39 $\Delta cps$ <i>rpsL1 mltG(Y488D) \Delta rodA::P<sub>c</sub>-erm</i>                                                                                                 | Erm <sup>R</sup>                                      | Tsui <i>et al.</i> , 2016     |
| IU11246 | D39 $\Delta cps$ <i>rpsL1 \Delta bgaA::tet-P<sub>Zn</sub>-RBS<sup>ftsA</sup>-pbp2b<sup>+</sup></i> (IU1824 X $\Delta bgaA::tet-PZn-RBSftsA-pbp2b+$ from IU9990)          | Tet <sup>R</sup>                                      | This study                    |
| IU11258 | D39 $\Delta cps$ <i>rpsL1 \Delta bgaA::tet-P<sub>Zn</sub>-RBS<sup>ftsA</sup>-pbp2b<sup>+</sup> \Delta pbp2b&lt;&gt;aad9</i> (IU11246 X $\Delta pbp2b<>aad9$ from IU7397) | Tet <sup>R</sup> Spc <sup>R</sup>                     | This study                    |
| IU11966 | TIGR4 P1542                                                                                                                                                              | None                                                  | Tettelin <i>et al.</i> , 2001 |

|         |                                                                                                                                                                                    |                                                       |                           |
|---------|------------------------------------------------------------------------------------------------------------------------------------------------------------------------------------|-------------------------------------------------------|---------------------------|
| IU11970 | D39 $\Delta cps \Delta pbp2b \langle \rightarrow aad9 sup7 khpB$ ( $\Delta C$ at Q270) (IU1945 X $\Delta pbp2b \langle \rightarrow aad9$ from IU7397)                              | Spc <sup>R</sup>                                      | This study                |
| IU11971 | D39 $\Delta cps \Delta pbp2b \langle \rightarrow aad9 sup8 khpB$ ( $\Omega A$ at I102) (IU1945 X $\Delta pbp2b \langle \rightarrow aad9$ from IU7397)                              | Spc <sup>R</sup>                                      | This study                |
| IU11975 | D39 $\Delta cps \Delta pbp2b \langle \rightarrow aad9 sup9 khpB$ (E143-stop) (IU1945 X $\Delta pbp2b \langle \rightarrow aad9$ from IU7397)                                        | Spc <sup>R</sup>                                      | This study                |
| IU12013 | D39 $\Delta cps \Delta pbp2b \langle \rightarrow aad9 sup10 khpA$ (M1-stop) (IU1945 X $\Delta pbp2b \langle \rightarrow aad9$ from IU7397)                                         | Spc <sup>R</sup>                                      | This study                |
| IU12015 | D39 $\Delta cps \Delta pbp2b \langle \rightarrow aad9 sup6$ ( $(\Omega(ddl^- ylmH))$ ) (IU1945 X $\Delta pbp2b \langle \rightarrow aad9$ from IU7397)                              | Spc <sup>R</sup>                                      | This study                |
| IU12260 | D39 $\Delta cps rpsL1 mltG(Y488D) \Delta khpA::P_c-[kan-rpsL^+]$ (IU9760 X $\Delta khpA::P_c-[kan-rpsL^+]$ from K751)                                                              | Kan <sup>R</sup> Str <sup>S</sup>                     | This study                |
| IU12286 | D39 $\Delta cps rpsL1 \Delta bgaA::tet-P_{Zn^-}RBS^{ftsA^-}ftsZ^+$ (IU1824 X $\Delta bgaA::tet-P_{Zn^-}ftsZ$ from 8122)                                                            | Tet <sup>R</sup>                                      | This study                |
| IU12288 | D39 $\Delta cps rpsL1 mltG(Y488D) \Delta khpA$ (IU12260 X fusion $\Delta khpA$ )                                                                                                   | Kan <sup>S</sup> Str <sup>R</sup>                     | This study                |
| IU12310 | D39 $\Delta cps rpsL1 \Delta bgaA::tet-P_{Zn^-}RBS^{ftsA^-}ftsA^+$                                                                                                                 | Str <sup>R</sup> Tet <sup>R</sup>                     | Mura <i>et al.</i> , 2017 |
| IU12323 | D39 $\Delta cps \Delta bgaA::tet-P_{Zn^-}RBS^{ftsA^-}ftsA^+ \Delta ftsA::aad9$                                                                                                     | Tet <sup>R</sup> Spc <sup>R</sup>                     | Mura <i>et al.</i> , 2017 |
| IU12332 | D39 $\Delta cps rpsL1 \Delta pbp1a \Delta coxE::P_c-erm$ (IU6741 X fusion $\Delta coxE::P_c-erm$ )                                                                                 | Kan <sup>S</sup> Str <sup>R</sup><br>Erm <sup>R</sup> | This study                |
| IU12707 | D39 $\Delta cps rpsL1 ftsA^+ \Delta pbp2b \langle \rightarrow aad9 // \Delta bgaA::tet-P_{Zn^-}RBS^{ftsA^-}ftsA^+$ (IU12310 X $\Delta pbp2b \langle \rightarrow aad9$ from IU7397) | Tet <sup>R</sup> Spc <sup>R</sup>                     | This study                |
| IU12718 | $\Delta bgaA::kan-t1t2-P_{ftsA^-}ftsA^+$ (IU1824 X fusion $\Delta bgaA::kan-t1t2-P_{ftsA^-}ftsA^+$ )                                                                               | Kan <sup>R</sup>                                      | This study                |
| IU12744 | D39 $\Delta cps rpsL1 khpB$ (T89A) (IU10560 X fusion $khpB$ (T89A) )                                                                                                               | Kan <sup>S</sup> Str <sup>R</sup>                     | This study                |
| IU12788 | D39 $\Delta cps rpsL1 \Delta bgaA::kan-P_{Zn^-}RBS^{ftsA^-}khpA^+$ (IU1824 X fusion $\Delta bgaA::kan-P_{Zn^-}RBS^{ftsA^-}khpA^+$ )                                                | Kan <sup>R</sup>                                      | This study                |
| IU12883 | D39 $\Delta cps rpsL1 \Delta khpA gpsB \langle \rightarrow aad9$ (IU9036 X $\Delta gpsB \langle \rightarrow aad9$ from IU4888)                                                     | Kan <sup>S</sup> Str <sup>R</sup><br>Spc <sup>R</sup> | This study                |
| IU12887 | D39 $\Delta cps rpsL1 \Delta bgaA::tet-P_{Zn^-}RBS^{ftsA^-}ftsA^+ \Delta mreCD \langle \rightarrow aad9$ (IU12310 X $\Delta mreCD \langle \rightarrow aad9$ from IU10651)          | Tet <sup>R</sup> Spc <sup>R</sup>                     | This study                |
| IU12901 | D39 $\Delta cps rpsL1 \Delta bgaA::tet-P_{Zn^-}RBS^{ftsA^-}ftsA^+ \Delta ftsA::aad9$ (IU12310 X $\Delta ftsA::aad9$ from IU12323)                                                  | Str <sup>R</sup> Tet <sup>R</sup><br>Spc <sup>R</sup> | This study                |
| IU12927 | D39 $\Delta cps rpsL1 \Delta khpA \Delta bgaA::tet-P_{Zn^-}RBS^{ftsA^-}ftsA^+$ (IU9036 X $\Delta bgaA::tet-P_{Zn^-}RBS^{ftsA^-}ftsA^+$ from IU12310)                               | Str <sup>R</sup> Kan <sup>S</sup><br>Tet <sup>R</sup> | This study                |
|         |                                                                                                                                                                                    |                                                       |                           |

|         |                                                                                                                                                                                                   |                                                                        |            |
|---------|---------------------------------------------------------------------------------------------------------------------------------------------------------------------------------------------------|------------------------------------------------------------------------|------------|
| IU12929 | D39 $\Delta cps rpsL1 \Delta khpA \Delta pbp2b \langle \rightarrow P_c-erm$<br>(IU9036 X fusion $\Delta pbp2b \langle \rightarrow P_c-erm$ )                                                      | Str <sup>R</sup> Kan <sup>S</sup><br>Erm <sup>R</sup>                  | This study |
| IU12959 | D39 $\Delta cps rpsL1 \Delta khpA \Delta bgaA::tet-P_{Zn^-}$<br>RBS <sup>ftsA</sup> -ftsA <sup>+</sup> $\Delta ftsA::aad9$ (IU12927 X<br>$\Delta ftsA::aad9$ from IU12323)                        | Str <sup>R</sup> Kan <sup>S</sup><br>Tet <sup>R</sup> Spc <sup>R</sup> | This study |
| IU12973 | D39 $\Delta cps rpsL1 \Delta khpB \Delta mreCD \langle \rightarrow aad9$<br>(IU10592 X $\Delta mreCD \langle \rightarrow aad9$ from IU10651)                                                      | Kan <sup>S</sup> Str <sup>R</sup><br>Spc <sup>R</sup>                  | This study |
| IU12975 | D39 $\Delta cps rpsL1 \Delta khpB \Delta rodZ \langle \rightarrow aad9$<br>(IU10592 X $\Delta rodZ \langle \rightarrow aad9$ from IU10657)                                                        | Kan <sup>S</sup> Str <sup>R</sup><br>Spc <sup>R</sup>                  | This study |
| IU12977 | D39 $\Delta cps rpsL1 \Delta khpB gpsB \langle \rightarrow aad9$ (IU10592<br>X $\Delta gpsB \langle \rightarrow aad9$ from IU4888)                                                                | Kan <sup>S</sup> Str <sup>R</sup><br>Spc <sup>R</sup>                  | This study |
| IU12979 | D39 $\Delta cps rpsL1 \Delta khpB \Delta rodA::P_c-erm$<br>(IU10592 X $\Delta rodA::P_c-erm$ from IU10943)                                                                                        | Kan <sup>S</sup> Str <sup>R</sup><br>Erm <sup>R</sup>                  | This study |
| IU13201 | D39 $\Delta cps rpsL1 \Delta bgaA::kan-t1t2-P_{ftsA^-}$ ftsA <sup>+</sup><br>$\Delta ftsA::aad9$ (IU12901 X $\Delta bgaA::kan-t1t2-P_{ftsA^-}$<br>ftsA <sup>+</sup> from IU12718)                 | Str <sup>R</sup> Kan <sup>R</sup><br>Spc <sup>R</sup>                  | This study |
| IU13204 | D39 $\Delta cps rpsL1 \Delta bgaA::kan-t1t2-P_{ftsA^-}$ ftsA <sup>+</sup><br>$\Delta ftsA::aad9 \Delta khpA$ (IU12959 X $\Delta bgaA::kan-$<br>t1t2- $P_{ftsA^-}$ ftsA <sup>+</sup> from IU12718) | Str <sup>R</sup> Kan <sup>R</sup><br>Spc <sup>R</sup>                  | This study |
| IU13436 | D39 $\Delta cps rpsL1 \Delta khpA \Delta rodA::P_c-erm$ (IU9036<br>X $\Delta rodA::P_c-erm$ from IU10943)                                                                                         | Kan <sup>S</sup> Str <sup>R</sup><br>Erm <sup>R</sup>                  | This study |
| IU13471 | D39 $\Delta cps rpsL1 \Delta bgaA::tet-P_{Zn^-}$ RBS <sup>ftsA</sup> -ftsA <sup>+</sup><br>$\Delta rodA::P_c-erm$ (IU12310 X $\Delta rodA::P_c-erm$ from<br>IU10943)                              | Tet <sup>R</sup> Erm <sup>R</sup>                                      | This study |
| IU13479 | D39 $\Delta khpA::P_c-erm \Delta pbp2b \langle \rightarrow aad9$ (IU9600 X<br>$\Delta pbp2b \langle \rightarrow aad9$ from IU7397)                                                                | Erm <sup>R</sup> Spc <sup>R</sup>                                      | This study |
| IU13483 | TIGR4 $\Delta khpA::P_c-erm$ (IU11966 X $\Delta khpA::P_c-$<br>erm from E751)                                                                                                                     | Erm <sup>R</sup>                                                       | This study |
| IU13639 | D39 $\Delta cps rpsL1 \Delta khpA P_c-[kan-rpsL^+]$ -ftsA <sup>+</sup><br>(IU9036 X $P_c-[kan-rpsL^+]$ -ftsA <sup>+</sup> from IU9767)                                                            | Kan <sup>R</sup> Str <sup>S</sup>                                      | This study |
| IU13641 | D39 $\Delta cps rpsL1 ftsA(\Delta UTR)$ (IU9767 X<br>$ftsA(\Delta UTR)$ fusion amplicon)                                                                                                          | Str <sup>R</sup> Kan <sup>S</sup>                                      | This study |
| IU13672 | D39 $\Delta cps rpsL1 \Delta khpA ftsA(\Delta UTR)$ (IU13639<br>X $ftsA(\Delta UTR)$ from IU13641)                                                                                                | Str <sup>R</sup> Kan <sup>S</sup>                                      | This study |
| IU13851 | D39 $\Delta cps rpsL1 \Delta khpB P_c-[kan-rpsL^+]$ -ftsA <sup>+</sup><br>(IU10592 X $P_c-[kan-rpsL^+]$ -ftsA <sup>+</sup> from IU9767)                                                           | Kan <sup>R</sup> Str <sup>S</sup>                                      | This study |
| IU13853 | D39 $\Delta cps rpsL1 \Delta khpA \Delta khpB P_c-[kan-rpsL^+]$ -<br>ftsA <sup>+</sup> (IU10596 X $P_c-[kan-rpsL^+]$ -ftsA <sup>+</sup> from<br>IU9767)                                           | Kan <sup>R</sup> Str <sup>S</sup>                                      | This study |
| IU13881 | D39 $\Delta cps rpsL1 khpB$ (T89D) (IU10560 X<br>fusion $khpB$ (T89D) )                                                                                                                           | Kan <sup>S</sup> Str <sup>R</sup>                                      | This study |
| IU13883 | D39 $\Delta cps rpsL1 khpB$ (T89E) (IU10560 X<br>fusion $khpB$ (T89E) )                                                                                                                           | Kan <sup>S</sup> Str <sup>R</sup>                                      | This study |
| IU13885 | D39 $\Delta cps rpsL1 khpB$ (T89A) (IU10560 X<br>$khpB$ (T89A) from IU12744)                                                                                                                      | Kan <sup>S</sup> Str <sup>R</sup>                                      | This study |
|         |                                                                                                                                                                                                   |                                                                        |            |

|                                                                              |                                                                                                                                                     |                                                        |                                              |
|------------------------------------------------------------------------------|-----------------------------------------------------------------------------------------------------------------------------------------------------|--------------------------------------------------------|----------------------------------------------|
| IU13887                                                                      | D39 $\Delta cps rpsL1 khpB$ (T89D) (IU10560 X fusion $khpB$ (T89D) )                                                                                | Kan <sup>S</sup> Str <sup>R</sup>                      | This study                                   |
| IU13889                                                                      | D39 $\Delta cps rpsL1 khpB$ (T89E) (IU10560 X fusion $khpB$ (T89E) )                                                                                | Kan <sup>S</sup> Str <sup>R</sup>                      | This study                                   |
| IU13891                                                                      | D39 $\Delta cps rpsL1 \Delta khpB ftsA(\Delta UTR)$ (IU13851 X $ftsA(\Delta UTR)$ from IU13641)                                                     | Str <sup>R</sup> Kan <sup>S</sup>                      | This study                                   |
| IU13893                                                                      | D39 $\Delta cps rpsL1 \Delta khpA \Delta khpB ftsA(\Delta UTR)$ (IU13853 X $ftsA(\Delta UTR)$ from IU13641)                                         | Str <sup>R</sup> Kan <sup>S</sup>                      | This study                                   |
| IU14024                                                                      | D39 $\Delta cps rpsL1 \Delta bgaA::kan-P_{Zn^-}RBS^{ftsA^-} khpB^+$ (IU1824 X fusion $\Delta bgaA::kan-P_{Zn^-}RBS^{ftsA^-} khpB^+$ )               | Kan <sup>R</sup>                                       | This study                                   |
| IU14026                                                                      | D39 $\Delta cps rpsL1 \Delta bgaA::kan-P_{Zn^-}RBS^{ftsA^-} khpA^+ khpB^+$ (IU1824 X fusion $\Delta bgaA::kan-P_{Zn^-}RBS^{ftsA^-} khpA^+ khpB^+$ ) | Kan <sup>R</sup>                                       | This study                                   |
| <b>Primers used to constructed strains</b>                                   |                                                                                                                                                     |                                                        |                                              |
| Primer                                                                       | Sequence (5' to 3')                                                                                                                                 | Template <sup>d</sup>                                  | Amplicon Product                             |
| <b>For construction of K751 (<math>\Delta khpA::P_c-[kan-rpsL^+]</math>)</b> |                                                                                                                                                     |                                                        |                                              |
| P1505                                                                        | GGGGCATCAATGCCATAAGTGTACTCAAAG                                                                                                                      | D39                                                    | 5' flanking fragment with 12 bp of 5' $khpA$ |
| P1507                                                                        | CATTATCCATTA AAAATCAAACGGATCCTACGCAATAATGAGATTTTCAATCGTATCC                                                                                         |                                                        |                                              |
| Kan rpsL forward                                                             | TAGGATCCGTTTGATTTTTAATGGATAATG                                                                                                                      | P <sub>c</sub> -[ $kan-rpsL^+$ ] cassette <sup>e</sup> | P <sub>c</sub> -[ $kan-rpsL^+$ ]             |
| Kan rpsL reverse                                                             | GGGCCCTTTTCCTTATGCTTTTG                                                                                                                             |                                                        |                                              |
| P1508                                                                        | CAAAGCATAAGGAAAGGGGCCATTGTCTACTCTGTCCCAACTGAATACAAA                                                                                                 | D39                                                    | 3' flanking fragment with 6 bp of 3' $khpA$  |
| P1506                                                                        | GTCATGAATCGGACTCCTACCTGTGTTCCG                                                                                                                      |                                                        |                                              |
| <b>For construction of K761 (<math>\Delta khpB::P_c-[kan-rpsL^+]</math>)</b> |                                                                                                                                                     |                                                        |                                              |
| P1539                                                                        | AGTCGAAACCTTGGGATACGCAGAGATGGA                                                                                                                      | D39                                                    | 5' flanking fragment with 60 bp of 5' $khpB$ |
| P1542                                                                        | AAACGTCCAAAAGCATAAGGAAAGGGGCCGTGACTAGTTACTCTGAAGGTGATGAGCCA                                                                                         |                                                        |                                              |
| Kan rpsL forward                                                             | TAGGATCCGTTTGATTTTTAATGGATAATG                                                                                                                      | P <sub>c</sub> -[ $kan-rpsL^+$ ] cassette <sup>e</sup> | P <sub>c</sub> -[ $kan-rpsL^+$ ]             |
| Kan rpsL reverse                                                             | GGGCCCTTTTCCTTATGCTTTTG                                                                                                                             |                                                        |                                              |
| P1541                                                                        | CATTATCCATTA AAAATCAAACGGATCCTATAATTCTTTCAATCCTTTCTGGATTGCTTC                                                                                       | D39                                                    | 3' flanking fragment with 60 bp of 3' $khpB$ |
| P1540                                                                        | ACCGCTGCACCAATTTGGAATTTGTAGTTA                                                                                                                      |                                                        |                                              |



| <b>For construction of E751 (<math>\Delta khpA:: P_c-erm</math>)</b>                               |                                                                 |                                                |                                                                   |
|----------------------------------------------------------------------------------------------------|-----------------------------------------------------------------|------------------------------------------------|-------------------------------------------------------------------|
| P1505                                                                                              | GGGGCATCAATGCCATAAGTGTACTCAAAG                                  | D39                                            | 5' flanking fragment with 12 bp of 5' <i>khpA</i>                 |
| P1507                                                                                              | CATTATCCATTA AAAATCAAACGGATCCTAC<br>GCAATAATGAGATTTTCAATCGTATCC |                                                |                                                                   |
| Kan rpsL forward                                                                                   | TAGGATCCGTTTGATTTTTAATGGATAATG                                  | <i>P<sub>c</sub>-erm</i> cassette <sup>e</sup> | <i>P<sub>c</sub>-erm</i>                                          |
| Kan rpsL reverse                                                                                   | GGGCCCTTTCCTTATGCTTTTG                                          |                                                |                                                                   |
| P1508                                                                                              | CAAAGCATAAGGAAAGGGGCCATTGTCT<br>ACTCTGTCCCAACTGAATACAAA         | D39                                            | 3' flanking fragment with 6 bp of 3' <i>khpA</i>                  |
| P1506                                                                                              | GTCATGAATCGGACTCCTACCTGTGTTCCG                                  |                                                |                                                                   |
| <b>For construction of IU5557 (<math>\Delta bgaA:: kan-t1t2-P_{fcsK}-ftsZ^+</math>)</b>            |                                                                 |                                                |                                                                   |
| TT657                                                                                              | CGCCCCAAGTTCATCACCAATGACATCAAC                                  | IU4888                                         | $\Delta bgaA-P_c-$<br><i>kan-t1t2-</i><br><i>P<sub>fcsK</sub></i> |
| TT201                                                                                              | CAGCTGTATCAAATGAAAATGTCATTTTTCT<br>TCTCTCTTCGTCCTTGATTAACCT     |                                                |                                                                   |
| TT202                                                                                              | ATCAAGGACGAAGAGAGAAGAAAATGACA<br>TTTTCATTTGATACAGCTGCTG         | D39                                            | <i>ftsZ</i> <sup>+</sup>                                          |
| TT203                                                                                              | ACTGTTTTATGAGAAAGTAAGTTCTTTTATT<br>AACGATTTTTGAAAATGGAGGTGTATC  |                                                |                                                                   |
| TT396                                                                                              | CCTCCATTTTTCAAAAATCGTTAGAAGAACT<br>TACTTTCTCATAAACCAAGTTGCTG    | D39                                            | <i>bgaA</i> ' 3' flanking                                         |
| CS121                                                                                              | GCTTTCTTGAGGCAATTCAGTTGGTGC                                     |                                                |                                                                   |
| <b>For construction of IU5809 (<i>spd_1366-L-FLAG<sup>3</sup>-P<sub>c</sub>-erm</i>)</b>           |                                                                 |                                                |                                                                   |
| P594                                                                                               | AAGGGAGATGACTTGCCTTGCCTGACAGT                                   | D39                                            | 5' flanking fragment                                              |
| DM215                                                                                              | CAGCGGAGCCAGCGGAACCCTTCTTTTT<br>TTAAATGGTGCAGGGCTTCTC           |                                                |                                                                   |
| DM214                                                                                              | GAAGCCCTGCACCATTTAAAAAAGAAGAAG<br>GGTCCGCTGGCTCCGCTGCTG         | IU4970                                         | L-F <sup>3</sup> - <i>P<sub>c</sub>-erm</i>                       |
| DM212                                                                                              | CATTACAAAAATATAAACTCTAAATTTCT<br>CCCGTTAAATAATAGATAAC           |                                                |                                                                   |
| DM213                                                                                              | CTATTATTTAACGGGAGGAAATTTAGAGTTT<br>TATATTTTTTGTAATGTTAAT        | D39                                            | 3' flanking fragment                                              |
| P595                                                                                               | ACTGGCAAGCGTGCTCGTGTATATTTGGCT                                  |                                                |                                                                   |
| <b>For construction of IU7054 (<math>\Delta bgaA:: kan-t1t2-P_{ftsA}-RBS^{ftsA}-ftsZ^+</math>)</b> |                                                                 |                                                |                                                                   |
| P146                                                                                               | TGGCCATTCATCGCTGGTCGTGCTGAAAT                                   | IU6397                                         | $\Delta bgaA:: kan-$<br><i>t1t2-P<sub>ftsA</sub></i>              |
| TT393                                                                                              | CAGCTGTATCAAATGAAAATGTCATTACATC<br>GCTTCCTCTCTATCTTCCAAGT       |                                                |                                                                   |
| TT394                                                                                              | GGAAGATAGAGAGGAAGCGATGTAATGACA<br>TTTTCATTTGATACAGCTGCTG        | IU5557                                         | 3' flanking containing <i>ftsZ</i> <sup>+</sup> - <i>bgaA</i> '   |
| CS121                                                                                              | GCTTTCTTGAGGCAATTCAGTTGGTGC                                     |                                                |                                                                   |
| <b>For construction of IU7814 (<math>\Delta ftsZ:: aad9</math>)</b>                                |                                                                 |                                                |                                                                   |
| AL366                                                                                              | GGCATGATGGGGTTCGCCTTGAAATGCG                                    | D39                                            | 5' upstream of <i>ftsZ</i>                                        |
| TT204                                                                                              | CGTATGTATTCAAATATATCCTCCTCACAATTTA<br>TTTTTCTCTTTATTCGTCAAACATG |                                                |                                                                   |

|                                                                                                                            |                                                                  |                     |                                                                                     |
|----------------------------------------------------------------------------------------------------------------------------|------------------------------------------------------------------|---------------------|-------------------------------------------------------------------------------------|
| TT205                                                                                                                      | TTGACGAATAAAGAGGAAAAATAATTGTGAGG<br>AGGATATATTTGAATACATACGAACA   | IU4888              | Middle- <i>aad9</i><br>+extra 9 bp<br>of 3' <i>mreD</i>                             |
| TT206                                                                                                                      | CTCGACTGGAGAAACGACTGAATGTCGTTCTTA<br>TAATTTTTTTAATCTGTTATTTAAA   |                     |                                                                                     |
| TT207                                                                                                                      | ACAGATTAAAAAAATTATAAGAACGACATTCAGT<br>CGTTTCTCCAGTCGAGCG         | D39                 | 87bp 3'<br><i>ftsZ</i> +stop +<br>downstream<br>region                              |
| TT166                                                                                                                      | TCATTGGGAGAGCCGGTTCCTGTGAAGAAT                                   |                     |                                                                                     |
| <b>For construction of IU8122 (<math>\Delta bgaA::tet-P_{Zn}</math>-RBS<sup><i>ftsA</i></sup>-<i>ftsZ</i><sup>+</sup>)</b> |                                                                  |                     |                                                                                     |
| TT657                                                                                                                      | CGCCCAAGTTCATCACCAATGACATCAAC                                    | pJWV25 <sup>f</sup> | <i>bgaA</i> <sup>+</sup> :: <i>tet</i> -<br>$P_{Zn}$ -RBS <sup><i>ftsA</i></sup>    |
| AJP32                                                                                                                      | ACATCGCTTCTCTCTATCTTCTTGTATAATA<br>GATTTATGAACACCTTGTTCAATTATC   |                     |                                                                                     |
| AJP33                                                                                                                      | AACAAGGTGTTCAATAATCTATTATAACAAGGAA<br>GATAGAGAGGAAGCGATGTAATGA   | IU7054              | RBS <sup><i>ftsA</i></sup> -<br><i>ftsZ</i> <sup>+</sup> - <i>bgaA</i> <sup>'</sup> |
| CS121                                                                                                                      | GCTTTCTTGAGGCAATTCACCTTGGTGC                                     |                     |                                                                                     |
| <b>For construction of IU9036 (<math>\Delta khpA</math>)</b>                                                               |                                                                  |                     |                                                                                     |
| P1505                                                                                                                      | GGGGCATCAATGCCATAAGTGTACTCAAAG                                   | D39                 | 5' flanking<br>fragment<br>with 12 bp<br>of 5' <i>khpA</i>                          |
| TT732                                                                                                                      | TCCCGCCCTTCTTATTTTTCAATCGTATCCA<br>TCTGTCAACCTACTTTAAACT         |                     |                                                                                     |
| TT733                                                                                                                      | AGTAGGTTGACAGATGGATACGATTGAAAA<br>ATAAGAAGGGCGGGACGG             | D39                 | 3' flanking<br>fragment<br>with 6 bp<br>of 3' <i>khpA</i>                           |
| P1506                                                                                                                      | GTCATGAATCGGACTCCTACCTGTGTTCCGG                                  |                     |                                                                                     |
| <b>For construction of IU9602 (<i>khpA</i>-L-FLAG<sup>3</sup>-P<sub>c</sub>-erm)</b>                                       |                                                                  |                     |                                                                                     |
| P1505                                                                                                                      | GGGGCATCAATGCCATAAGTGTACTCAAAG                                   | D39                 | 5' flanking<br>fragment                                                             |
| JQ135                                                                                                                      | GCCAGAACCAGCAGCGGAGCCAGCGGAAC<br>CTTTTTCGTCAATAACGATTCTTACTTTTTT |                     |                                                                                     |
| JQ136                                                                                                                      | AAAAAAGTAAGAATCGTTATTGACGAAAAAG<br>GTTCCGCTGGCTCCGCTGCTGGTTCTGGC | IU4970              | L-F <sup>3</sup> - P <sub>c</sub> -<br><i>erm</i>                                   |
| JQ137                                                                                                                      | CAAAAAGCGAGACATCCGTCCCGCCCTTC<br>TTATTTCTCCCGTTAAATAATAGATAACT   |                     |                                                                                     |
| JQ138                                                                                                                      | AGTTATCTATTATTTAACGGGAGGAAATAAG<br>AAGGGCGGGACGGATGTCTCGCTTTTTTG | D39                 | 3' flanking<br>fragment                                                             |
| P1506                                                                                                                      | GTCATGAATCGGACTCCTACCTGTGTTCCGG                                  |                     |                                                                                     |
| <b>For construction of IU9621 (<math>\Delta bgaA::kan-T1T2</math>-P<sub><i>ftsA</i></sub>-<i>khpA</i><sup>+</sup>)</b>     |                                                                  |                     |                                                                                     |
| P146                                                                                                                       | TGGCCATTCATCGCTGGTCTGCTGAAAT                                     | D39                 | 5' flanking<br>fragment                                                             |
| JQ139                                                                                                                      | CGCAATAATGAGATTTTCAATCGTATCCATT<br>ACATCGCTTCTCTCTATCTTCCAAGTTT  |                     |                                                                                     |
| JQ140                                                                                                                      | AACTTGAAGATAGAGAGGAAGCGATGTA<br>ATGGATACGATTGAAAATCTCATTATTGCG   | IU6397              | P <sub><i>ftsA</i></sub> - <i>khpA</i> <sup>+</sup><br>cassette                     |
| JQ141                                                                                                                      | AGCAACTGGTTTATGAGAAAGTAAGTTCTTT<br>TATTTTTCGTCAATAACGATTCTTACTTT |                     |                                                                                     |
| JQ142                                                                                                                      | AAAGTAAGAATCGTTATTGACGAAAAATAAA<br>AGAACTTACTTTCTCATAAACCAGTTGCT | D39                 | 3' flanking<br>fragment                                                             |
| CS121                                                                                                                      | GCTTTCTTGAGGCAATTCACCTTGGTGC                                     |                     |                                                                                     |

| <b>For construction of IU9697 (<i>khpA</i>-L-FLAG<sup>3</sup>)</b>       |                                                                  |        |                                                                |
|--------------------------------------------------------------------------|------------------------------------------------------------------|--------|----------------------------------------------------------------|
| P1505                                                                    | GGGGCATCAATGCCATAAGTGTACTCAAAG                                   | IU9602 | 5' flanking fragment<br><i>khpA</i> -L-F <sup>3</sup>          |
| JQ149                                                                    | CAAAAAGCGAGACATCCGTCCCGCCCTTC<br>TTATTTATCATCATCATCTTTATAATCTTT  |        |                                                                |
| JQ150                                                                    | AAAGATTATAAAGATGATGATGATAAATAAG<br>AAGGGCGGGACGGATGTCTCGCTTTTTTG | D39    | 3' flanking fragment                                           |
| P1506                                                                    | GTCATGAATCGGACTCCTACCTGTGTTTCGG                                  |        |                                                                |
| <b>For construction of IU9935 (<i>khpA</i> (G49A))</b>                   |                                                                  |        |                                                                |
| P1505                                                                    | GGGGCATCAATGCCATAAGTGTACTCAAAG                                   | D39    | 5' flanking fragment                                           |
| JQ151                                                                    | CCTTACGAGCGATTACACGACCCACATC                                     |        |                                                                |
| JQ152                                                                    | GATGTGGGTCGTGTAATCGCTCGTAAGG                                     | D39    | 3' flanking fragment                                           |
| P1506                                                                    | GTCATGAATCGGACTCCTACCTGTGTTTCGG                                  |        |                                                                |
| <b>For construction of IU9937 (<i>khpA</i> (G52A))</b>                   |                                                                  |        |                                                                |
| P1505                                                                    | GGGGCATCAATGCCATAAGTGTACTCAAAG                                   | D39    | 5' flanking fragment                                           |
| JQ153                                                                    | CTTATCGCAGAAATAGTGCGAGCCTTACGA                                   |        |                                                                |
| JQ154                                                                    | TCGTAAGGCTCGCACTATTTCTGCGATAAG                                   | D39    | 3' flanking fragment                                           |
| P1506                                                                    | GTCATGAATCGGACTCCTACCTGTGTTTCGG                                  |        |                                                                |
| <b>For construction of IU9939 (<i>khpA</i>(G49A)-L-FLAG<sup>3</sup>)</b> |                                                                  |        |                                                                |
| P1505                                                                    | GGGGCATCAATGCCATAAGTGTACTCAAAG                                   | D39    | 5' flanking fragment                                           |
| JQ151                                                                    | CCTTACGAGCGATTACACGACCCACATC                                     |        |                                                                |
| JQ152                                                                    | GATGTGGGTCGTGTAATCGCTCGTAAGG                                     | IU9697 | 3' flanking fragment<br><i>khpA</i> (G49A)-L-FLAG <sup>3</sup> |
| P1506                                                                    | GTCATGAATCGGACTCCTACCTGTGTTTCGG                                  |        |                                                                |
| <b>For construction of IU9941 (<i>khpA</i>(G52A)-L-FLAG<sup>3</sup>)</b> |                                                                  |        |                                                                |
| P1505                                                                    | GGGGCATCAATGCCATAAGTGTACTCAAAG                                   | D39    | 5' flanking fragment                                           |
| JQ153                                                                    | CTTATCGCAGAAATAGTGCGAGCCTTACGA                                   |        |                                                                |
| JQ154                                                                    | TCGTAAGGCTCGCACTATTTCTGCGATAAG                                   | IU9697 | 3' flanking fragment<br><i>khpA</i> (G52A)-L-FLAG <sup>3</sup> |
| P1506                                                                    | GTCATGAATCGGACTCCTACCTGTGTTTCGG                                  |        |                                                                |
| <b>For construction of IU9977 (<i>khpA</i> (G49A G52A))</b>              |                                                                  |        |                                                                |
| P1505                                                                    | GGGGCATCAATGCCATAAGTGTACTCAAAG                                   | IU9935 | 5' flanking fragment<br><i>khpA</i> (G49A)                     |
| JQ153                                                                    | CTTATCGCAGAAATAGTGCGAGCCTTACGA                                   |        |                                                                |
| JQ154                                                                    | TCGTAAGGCTCGCACTATTTCTGCGATAAG                                   | IU9935 | 3' flanking fragment                                           |
| P1506                                                                    | GTCATGAATCGGACTCCTACCTGTGTTTCGG                                  |        |                                                                |

| <b>For construction of IU9979 (<i>khpA</i>(G49A G52A)-L-FLAG<sup>3</sup>)</b>    |                                                              |        |                                                                |
|----------------------------------------------------------------------------------|--------------------------------------------------------------|--------|----------------------------------------------------------------|
| P1505                                                                            | GGGGCATCAATGCCATAAGTGTACTCAAAG                               | IU9935 | 5' flanking fragment<br><i>khpA</i><br>(G49A)                  |
| JQ153                                                                            | CTTATCGCAGAAATAGTGCGAGCCTTACGA                               |        |                                                                |
| JQ154                                                                            | TCGTAAGGCTCGCACTATTTCTGCGATAAG                               | IU9697 | 3' flanking fragment<br><i>khpA</i> (G52A)-L-FLAG <sup>3</sup> |
| P1506                                                                            | GTCATGAATCGGACTCCTACCTGTGTTCCGG                              |        |                                                                |
| <b>For construction of IU9990 (<math>\Delta bgaA::tet-P_{zn}-pbp2b^+</math>)</b> |                                                              |        |                                                                |
| P146                                                                             | TGGCCATTCATCGCTGGTCGTGCTGAAAT                                | IU8122 | 5' fragment<br>$\Delta bgaA::P_{zn}$                           |
| BR70                                                                             | GTTAAATTTTCTCATACAAATCAGTCTCATTACATCGCTTCCTCTCTATCTTCCTTGTTA |        |                                                                |
| BR69                                                                             | AGGAAGATAGAGAGGAAGCGATGTAATGAGACTGATTTGTATGAGAAAATTTAACAGC   | D39    | middle fragment<br><i>pbp2b</i> <sup>+</sup>                   |
| BR72                                                                             | AACTGGTTTATGAGAAAGTAAGTTCTTCTAATTCATTGGATGGTATTTTTGATACAGATT |        |                                                                |
| BR71                                                                             | ATATCAAAAATACCATCCAATGAATTAGAAGAACTTACTTTCTCATAAACCAGTTGCTGC | IU8122 | 3' fragment                                                    |
| CS121                                                                            | GCTTTCTTGAGGCAATTCACTTGGTGC                                  |        |                                                                |
| <b>For construction of IU10091 (<i>khpA</i> (R50D K51D))</b>                     |                                                              |        |                                                                |
| P1505                                                                            | GGGGCATCAATGCCATAAGTGTACTCAAAG                               | D39    | 5' flanking<br><i>khpA</i><br>(R50D K51D)                      |
| JQ155                                                                            | AGAAATAGTGCGACCATCATCACCGATTAC                               |        |                                                                |
| JQ156                                                                            | GTAATCGGTGATGATGGTCGCACTATTTCT                               | D39    | 3' flanking<br><i>khpA</i><br>(R50D K51D)                      |
| P1506                                                                            | GTCATGAATCGGACTCCTACCTGTGTTCCGG                              |        |                                                                |
| <b>For construction of IU10092 (<i>khpA</i> (R50D K51D)-L-FLAG<sup>3</sup>)</b>  |                                                              |        |                                                                |
| P1505                                                                            | GGGGCATCAATGCCATAAGTGTACTCAAAG                               | D39    | 5' flanking<br><i>khpA</i><br>(R50D K51D)                      |
| JQ155                                                                            | AGAAATAGTGCGACCATCATCACCGATTAC                               |        |                                                                |
| JQ156                                                                            | GTAATCGGTGATGATGGTCGCACTATTTCT                               | IU9697 | 3' flanking<br><i>khpA</i><br>(R50D K51D)-L-FLAG <sup>3</sup>  |
| P1506                                                                            | GTCATGAATCGGACTCCTACCTGTGTTCCGG                              |        |                                                                |
|                                                                                  |                                                              |        |                                                                |

| <b>For construction of IU10592 (<math>\Delta khpB</math>)</b>                                              |                                                                    |                                           |                                                   |
|------------------------------------------------------------------------------------------------------------|--------------------------------------------------------------------|-------------------------------------------|---------------------------------------------------|
| P1539                                                                                                      | AGTCGAAACCTTGGGATACGCAGAGATGGA                                     | D39                                       | 5' flanking fragment with 60 bp of 5' <i>khpB</i> |
| JQ167                                                                                                      | TGGCTCATCACCTTCAGAGTAACTAGTCACT<br>AATTCTTTCAATCCTTTCTGGATTGCTTC   |                                           |                                                   |
| JQ168                                                                                                      | GAAGCAATCCAGAAAGGATTGAAAGAATTA<br>GTGACTAGTTACTCTGAAGGTGATGAGCCA   | D39                                       | 3' flanking fragment with 60 bp of 3' <i>khpB</i> |
| P1540                                                                                                      | ACCGCTGCACCAATTTGGAATTTGTAGTTA                                     |                                           |                                                   |
| <b>For construction of IU10594 (<i>khpB</i>-HA)</b>                                                        |                                                                    |                                           |                                                   |
| P1539                                                                                                      | AGTCGAAACCTTGGGATACGCAGAGATGGA                                     | D39                                       | 5' flanking fragment                              |
| JQ169                                                                                                      | AAACCTGATTTTACTTAAGCATAATCTGGAA<br>CATCATATGGATATTCTGTATCTACAACA   |                                           |                                                   |
| JQ170                                                                                                      | TGTTGTAGATACAGAATATCCATATGATGTT<br>CCAGATTATGCTTAAGTAAAATCAGGTTT   | D39                                       | 3' flanking fragment                              |
| P1540                                                                                                      | ACCGCTGCACCAATTTGGAATTTGTAGTTA                                     |                                           |                                                   |
| <b>For construction of IU10664 (<i>khpB</i>-L-FLAG<sup>3</sup>-P<sub>c</sub>-erm)</b>                      |                                                                    |                                           |                                                   |
| P1539                                                                                                      | AGTCGAAACCTTGGGATACGCAGAGATGGA                                     | D39                                       | 5' flanking fragment                              |
| JQ185                                                                                                      | GCCAGAACCAGCAGCGGAGCCAGCGGAAC<br>CTTCTGTATCTACAACAACATAGCGATTTGG   |                                           |                                                   |
| JQ179                                                                                                      | GGTTCGCTGGCTCCGCTGCTGGTTCTGG<br>C                                  | IU4970                                    | L-F <sup>3</sup> -P <sub>c</sub> -erm             |
| JQ184                                                                                                      | TTATTTCCCTCCCGTTAAATAATAGATAACTAT                                  | D39                                       | 3' flanking fragment                              |
| JQ186                                                                                                      | ATAGTTATCTATTATTTAACGGGAGGAAATA<br>AGTAAAATCAGGTTTATCCTGATTTTTTG   |                                           |                                                   |
| P1540                                                                                                      | ACCGCTGCACCAATTTGGAATTTGTAGTTA                                     |                                           |                                                   |
| <b>For construction of IU12332 (<math>\Delta coxE:: P_c</math>-erm)</b>                                    |                                                                    |                                           |                                                   |
| TT962                                                                                                      | CCACCACGGTAAGCAGGCATACCTTCTAAC                                     | D39                                       | 5' flanking fragment with 90 bp of 5' <i>coxE</i> |
| TT974                                                                                                      | ACATTATCCATTA AAAATCAAACGGATCCTA<br>CAAAGATCCCATCTGTCTCCATAGGTA AA |                                           |                                                   |
| Kan rpsL forward                                                                                           | TAGGATCCGTTTGATTTTTAATGGATAATG                                     | P <sub>c</sub> -erm cassette <sup>e</sup> | P <sub>c</sub> -erm                               |
| Kan rpsL reverse                                                                                           | GGGCCCTTTTCCTTATGCTTTTG                                            |                                           |                                                   |
| TT975                                                                                                      | GTCCAAAAGCATAAGGAAAGGGGCCCTCCC<br>GTTTGTATGAAAATCATAAAATAATGAAAG   | D39                                       | 3' flanking fragment with 60 bp of 5' <i>coxE</i> |
| TT963                                                                                                      | GCCGCTAGACAAGGCTTAATCGTATCTCGC                                     |                                           |                                                   |
| <b>For construction of IU12718 (<math>\Delta bgaA:: kan</math>-T1T2-P<sub>ftsA</sub>-ftsA<sup>+</sup>)</b> |                                                                    |                                           |                                                   |
| P146                                                                                                       | TGGCCATTCATCGCTGGTCGTGCTGAAAT                                      | IU9621                                    | 5' $\Delta bgaA$ -Kan-T1T2                        |
| SC484                                                                                                      | GAGCAAAAAGAAAGCTCTGTGGTAGAAAC<br>GCAAAAAGGCCATCCGTCAGG             |                                           |                                                   |

|                                                                                                  |                                                                   |                                    |                         |
|--------------------------------------------------------------------------------------------------|-------------------------------------------------------------------|------------------------------------|-------------------------|
| SC483                                                                                            | GACGGATGGCCTTTTTGCGTTTCTACCACA<br>GAGCTTTCTTTTTGCTCTTAGAGAG       | D39                                | $P_{ftsA-ftsA^+}$       |
| AJP49                                                                                            | CAACTGGTTTATGAGAAAGTAAGTTCTTTTA<br>TTCGTCAAACATGCTTCCGATC         |                                    |                         |
| AJP50                                                                                            | CGGAAGCATGTTTGACGAATAAAAGAACTT<br>ACTTTCTCATAAACCAGTTGC           | D39                                | 3' flanking<br>fragment |
| CS121                                                                                            | GCTTTCTTGAGGCAATTCAGTTGGTGC                                       |                                    |                         |
| <b>For construction of IU12744 (<i>khpB</i> (T89A))</b>                                          |                                                                   |                                    |                         |
| P1539                                                                                            | AGTCGAAACCTTGGGATACGCAGAGATGGA                                    | D39                                | 5' flanking<br>fragment |
| JQ300                                                                                            | TGACCAAGGTCAACGGCTTCTTCACTAACC                                    |                                    |                         |
| JQ299                                                                                            | GGTTAGTGAAGAAGCCGTTGACCTTGGTCA                                    | D39                                | 3' flanking<br>fragment |
| P1540                                                                                            | ACCGCTGCACCAATTTGGAATTTGTAGTTA                                    |                                    |                         |
| <b>For construction of IU12788 (<math>\Delta bgaA::kan-T1T2-P_{Zn}-RBS^{ftsA}-khpA^+</math>)</b> |                                                                   |                                    |                         |
| P146                                                                                             | TGGCCATTCATCGCTGGTCGTGCTGAAAT                                     | IU9621                             | $\Delta bgaA::kan-T1T2$ |
| JQ145                                                                                            | CCGTATCAGCAAAACCAAAAAGCCATCTA<br>GTAGAAACGCAAAAAGGCCATCCGTCAGGA   |                                    |                         |
| JQ146                                                                                            | TCCTGACGGATGGCCTTTTTGCGTTTCTACT<br>AGATGGCTTTTTGGTTTTGCTGATACGG   | IU8872                             | $P_{Zn}$                |
| JQ147                                                                                            | CGCAATAATGAGATTTTCAATCGTATCCATA<br>AGTTTTTCCTCCTTGTTGATAATTTGTTA  |                                    |                         |
| JQ148                                                                                            | TAACAAATTATCAACAAGGAGGAAAACTTA<br>TGGATACGATTGAAAATCTCATTATTGCG   | IU9621                             | $RBS^{ftsA}-khpA^+$     |
| CS121                                                                                            | GCTTTCTTGAGGCAATTCAGTTGGTGC                                       |                                    |                         |
| <b>For construction of IU12929 (<math>\Delta pbp2b \leftrightarrow P_c-erm</math>)</b>           |                                                                   |                                    |                         |
| TT452                                                                                            | GGAGGGTTGGCTGTGGGTGGCTACAAGAA<br>C                                | D39                                | 5' flanking<br>fragment |
| JQ255                                                                                            | CATTATCCATTA AAAATCAAACGGATCCTAT<br>TCTAACTTAAAATCTTACTCTTAATTGTA |                                    |                         |
| Kan rpsL<br>forward                                                                              | TAGGATCCGTTTGATTTTTAATGGATAATG                                    | $P_c-erm$<br>cassette <sup>e</sup> | $P_c-erm$               |
| Kan rpsL<br>reverse                                                                              | GGGCCCTTTCCTTATGCTTTTG                                            |                                    |                         |
| JQ256                                                                                            | CAAAGCATAAGGAAAGGGGCCCAAAGGA<br>AATTATGCTTTATCCAACACCTATTGCCAAG   | D39                                | 3' flanking<br>fragment |
| TT352                                                                                            | TGAAGGACTGGAAGACCACTGCACCTTCT                                     |                                    |                         |
| <b>For construction of IU13641 (<i>ftsA</i>(<math>\Delta</math>UTR))</b>                         |                                                                   |                                    |                         |
| TT780                                                                                            | CGCATTACCAAGGAGCAAATAGAGCTTCTT<br>TGGCAGG                         | D39                                | 5' flanking<br>fragment |
| JQ352                                                                                            | AGCCATTACATCGCTTCTCTCTATCTTCCC<br>ACAAAATATTATAACACAAAAAATTTAAT   |                                    |                         |
| JQ353                                                                                            | ATTAATTTTTTGTGTTATAATTTTTGTGGG<br>AAGATAGAGAGGAAGCGATGTAATGGCT    | D39                                | 3' flanking<br>fragment |
| TT753                                                                                            | GCCTTCCGCTAATTTGCGAGAGGTTTTCAA                                    |                                    |                         |

| <b>For construction of IU13881 (<i>khpB</i> (T89D))</b>                                                 |                                                              |                 |                                                  |
|---------------------------------------------------------------------------------------------------------|--------------------------------------------------------------|-----------------|--------------------------------------------------|
| P1539                                                                                                   | AGTCGAAACCTTGGGATACGCAGAGATGGA                               | D39             | 5' flanking fragment                             |
| JQ375                                                                                                   | TGACCAAGGTCAACATCTTCTTCACTAACC                               |                 |                                                  |
| JQ376                                                                                                   | GGTTAGTGAAGAAGATGTTGACCTTGGTCA                               | D39             | 3' flanking fragment                             |
| P1540                                                                                                   | ACCGCTGCACCAATTTGGAATTTGTAGTTA                               |                 |                                                  |
| <b>For construction of IU13883 (<i>khpB</i> (T89E))</b>                                                 |                                                              |                 |                                                  |
| P1539                                                                                                   | AGTCGAAACCTTGGGATACGCAGAGATGGA                               | D39             | 5' flanking fragment                             |
| JQ377                                                                                                   | TGACCAAGGTCAACTTCTTCTTCACTAACC                               |                 |                                                  |
| JQ378                                                                                                   | GGTTAGTGAAGAAGAAGTTGACCTTGGTCA                               | D39             | 3' flanking fragment                             |
| P1540                                                                                                   | ACCGCTGCACCAATTTGGAATTTGTAGTTA                               |                 |                                                  |
| <b>For construction of IU14024 (<math>\Delta bgaA::kan-T1T2-P_{Zn}-RBS^{ftsA}-khpB^+</math>)</b>        |                                                              |                 |                                                  |
| P146                                                                                                    | TGGCCATTCATCGCTGGTCGTGCTGAAAT                                | IU12788         | $\Delta bgaA::kan-T1T2-P_{Zn}-RBS^{ftsA}$        |
| JQ239                                                                                                   | TTCAACAGTTGAACCTGTAAATACTACCACTACATCGCTTCCTCTCTATCTTCCTTGTTA |                 |                                                  |
| JQ240                                                                                                   | TAACAAGGAAGATAGAGAGGAAGCGATGTAGTGGTAGTATTTACAGGTTCAACTGTTGAA | D39             | <i>khpB</i> <sup>+</sup>                         |
| JQ189                                                                                                   | AGCAACTGGTTTATGAGAAAGTAAGTTCTTTATTCTGTATCTACAACAACATAGCGATT  |                 |                                                  |
| JQ190                                                                                                   | AATCGCTATGTTGTTGTAGATACAGAATAAAAGAACTTACTTTCTCATAAACCAGTTGCT | IU12788         | 3' flanking fragment                             |
| CS121                                                                                                   | GCTTTCTTGAGGCAATTCAGTTGGTGC                                  |                 |                                                  |
| <b>For construction of IU14024 (<math>\Delta bgaA::kan-T1T2-P_{Zn}-RBS^{ftsA}-khpA^+-khpB^+</math>)</b> |                                                              |                 |                                                  |
| P146                                                                                                    | TGGCCATTCATCGCTGGTCGTGCTGAAAT                                | IU12788         | $\Delta bgaA::kan-T1T2-P_{Zn}-RBS^{ftsA}-khpA^+$ |
| JQ385                                                                                                   | ACCACTACCAGATTCCTCCTTATTTATTTCTTATTTTTCGTCAATAACGATTCTTACTTT |                 |                                                  |
| JQ386                                                                                                   | AAAGTAAGAATCGTTATTGACGAAAAATAAGAAATAAATAAGGAGGAATCTGGTAGTGGT | D39             | <i>khpB</i> <sup>+</sup>                         |
| JQ189                                                                                                   | AGCAACTGGTTTATGAGAAAGTAAGTTCTTTATTCTGTATCTACAACAACATAGCGATT  |                 |                                                  |
| JQ190                                                                                                   | AATCGCTATGTTGTTGTAGATACAGAATAAAAGAACTTACTTTCTCATAAACCAGTTGCT | IU12788         | 3' flanking fragment                             |
| CS121                                                                                                   | GCTTTCTTGAGGCAATTCAGTTGGTGC                                  |                 |                                                  |
| <b>Primers used for qRT-PCR</b>                                                                         |                                                              |                 |                                                  |
| Primer name                                                                                             | Sequence (5' to 3')                                          | Gene name       |                                                  |
| AL031                                                                                                   | CTGCGACAGCAGATTTGACCACTA                                     | <i>spd_1874</i> |                                                  |
| AL032                                                                                                   | TTCCTGAGGAGCTTCTTCTGCAAC                                     |                 |                                                  |
| AL023                                                                                                   | GGAGTAGCTGCCTTGTTTGCAGTA                                     | <i>spd_0104</i> |                                                  |

|       |                          |                 |
|-------|--------------------------|-----------------|
| AL024 | CAGGGCCATCGATAACCAACTCTT |                 |
| JQ235 | GCAGATGGCTAATTTCTATG     | <i>spd_0023</i> |
| JQ236 | CCCCGATTCATTACCAATTT     |                 |
| JQ237 | GGAATCCCTGCTGAATCGTAA    | <i>spd_2067</i> |
| JQ238 | AAGCTGACCGTGATTTTCGTTA   |                 |
| JQ293 | GACTGTGCTACAATCCGTAATC   | <i>ftsA</i>     |
| JQ294 | GTCACTTCGACTGCTTCTACTTC  |                 |
| JQ295 | CGTGAGCATGTAGACACTCTATTG | <i>ftsZ</i>     |
| JQ296 | TCTCCACTACCGATAACCAATACC |                 |
| KK387 | CAGCAGTAGGGAATCTTCGGCAAT | 16s rRNA        |
| KK388 | TACGCCCAATAAATCCGGACAACG |                 |
| KK489 | AAAGGTCGTGGTGGTAAGGGAATG | <i>gyrA</i>     |
| KK490 | GCATCTTGATCCAGGCGCATTACT |                 |

#### Templates and primers used to generate amplicons for transformation assays

| amplicon                                  | Strain used for template | primers      |
|-------------------------------------------|--------------------------|--------------|
| $\Delta pbp2b \langle \rightarrow aad9$   | IU7397                   | TT452, TT352 |
| $\Delta pbp2b \langle \rightarrow Pc-erm$ | IU12929                  | TT452, TT352 |
| $\Delta mreCD \langle \rightarrow aad9$   | IU10651                  | AL35, AL17   |
| $\Delta rodZ \langle \rightarrow aad9$    | IU10657                  | TT329, P1385 |
| $\Delta rodA::Pc-erm$                     | IU10943                  | P1543, P1544 |
| $\Delta mltG::Pc-erm$                     | IU7260 <sup>g</sup>      | P1348, P1349 |
| $\Delta coxE::Pc-erm$                     | IU12332                  | TT962, TT963 |
| $\Delta gpsB \langle \rightarrow aad9$    | IU4888                   | TT196, TT197 |
| $\Delta pbp1b::Pc-erm$                    | E193                     | P222, P522   |

84  
85 <sup>a</sup>FLAG-tag fusions ((C)-L-FLAG<sup>3</sup>) were made to the carboxyl-ends (C) of reading  
86 frames. The amino acid sequence of the FLAG epitope is DYKDDDDK (Ramos-  
87 Montanez *et al.*, 2008; Wayne *et al.*, 2010). The FLAG-tag used in this study contained  
88 a linker sequence (L; GSAGSAAGSG) followed by three tandem copies of the FLAG  
89 epitope (FLAG<sup>3</sup>). HA-tag fusions ((C)-HA) were made to the carboxyl-ends (C) of  
90 reading frames. The amino acid sequence of the HA epitope is YPYDVPDYA (Wilson *et*  
91 *al.*, 1984).  
92



93           <sup>b</sup>Antibiotic resistance markers: Erm<sup>R</sup>, erythromycin; Kan<sup>R</sup>, kanamycin; Spc<sup>R</sup>,  
94 spectinomycin; Str<sup>R</sup>, streptomycin; Tet<sup>R</sup>, tetracycline.

95  
96           <sup>c</sup>IU1824 ( $\Delta cps$  *rpsL1*) picked up a spontaneous GC→TA drift mutation 4 bp  
97 upstream of the -35 box of the P<sub>*ftsA*</sub> promoter (-119 bp upstream of the *ftsA* start codon),  
98 in a region that does not contain apparent regulatory direct or indirect repeats. FtsA  
99 expression is comparable in IU1824 and IU1945, which lacks the drift mutation (data not  
100 shown).

101  
102           <sup>d</sup>Genomic DNA of indicated *S. pneumoniae* strains was used as templates for PCR  
103 reactions, except for P<sub>c</sub>-[*kan-rpsL*<sup>+</sup>] and P<sub>c</sub>-*erm* cassettes.

104  
105           <sup>e</sup>P<sub>c</sub>-*erm* and P<sub>c</sub>-[*kan-rpsL*<sup>+</sup>] cassettes are described in (Tsui *et al.*, 2011).

106  
107           <sup>f</sup>pJWV25 (Eberhardt *et al.*, 2009).

108  
109           <sup>g</sup>IU7260 (Tsui *et al.*, 2016)

110

111  
112  
113

**Table S2.** Spontaneous suppressor mutations in D39  $\Delta cps \Delta pbp2b$  strains identified by Illumina whole-genome or conventional sequencing<sup>a</sup>

| Strain <sup>b</sup>       | Gene and mutation                     | Annotated protein function                                                    |
|---------------------------|---------------------------------------|-------------------------------------------------------------------------------|
| <i>sup1</i><br>(IU7476)   | <i>spd_0268</i> (S189C)               | CAAX amino terminal protease family protein                                   |
|                           | <i>spd_0675</i> ( $\Delta A$ at K71)  | KH domain protein                                                             |
|                           | <i>crcB1</i> (S72L)                   | CrcB family protein                                                           |
| <i>sup6</i><br>(IU12015)  | $\Omega$ ( <i>ddl'-ylmH'</i> )        | Contains chromosomal duplication of the <i>ftsA-ftsZ</i> region (see Fig. S5) |
| <i>sup7</i><br>(IU11970)  | <i>spd_1849</i> ( $\Delta C$ at Q270) | KhpB RNA binding protein (see Fig. 1B and text)                               |
| <i>sup8</i><br>(IU11971)  | <i>spd_1849</i> ( $\Omega A$ at I102) | KhpB RNA binding protein (see Fig. 1B and text)                               |
| <i>sup9</i><br>(IU11975)  | <i>spd_1849</i> (E143-STOP)           | KhpB RNA binding protein (see Fig. 1B and text)                               |
| <i>sup10</i><br>(IU12013) | <i>spd_0675</i> (M1-STOP)             | KhpA RNA binding protein (see Fig. 1A and text)                               |

114  
115

<sup>a</sup>Illumina MiSeq (IU7476) or NextSeq (IU12015) whole-genome sequencing was performed as described in Experimental procedures. Conventional sequencing of *khpA* and *khpB* was performed on strains IU11970, IU11971, IU11975, and IU12013.

116  
117  
118  
119

<sup>b</sup>Strains IU7476, IU12015, IU11970, IU11971, IU11975, and IU12013) were isolated from the small number of colonies that arose following independent transformations of unencapsulated strain IU1945 (D39  $\Delta cps$ ) with a  $\Delta pbp2b \leftrightarrow aad9$  amplicon (see text and Supplemental Table S1).

120  
121  
122  
123

**Table S3.** mRNA-Seq results for a  $\Delta khpA$  mutant<sup>a</sup>

| <b><math>\Delta khpA</math> mutant (IU9036) relative to the wild-type parent strain (IU1824)</b> |                  |                                                                    |                    |                        |
|--------------------------------------------------------------------------------------------------|------------------|--------------------------------------------------------------------|--------------------|------------------------|
| <b>SPD number</b>                                                                                | <b>Gene name</b> | <b>Protein function</b>                                            | <b>Fold change</b> | <b>FDR<sup>b</sup></b> |
| <b>Increased relative transcript amounts</b>                                                     |                  |                                                                    |                    |                        |
| WalRK regulon                                                                                    |                  |                                                                    |                    |                        |
| 0104                                                                                             | -                | LysM domain protein                                                | 9.0                | 1.95E-22               |
| 0703                                                                                             | -                | Conserved hypothetical protein, putative SEDS protein              | 7.3                | 1.77E-32               |
| 1871                                                                                             | -                | Conserved hypothetical membrane protein                            | 3.9                | 0.03                   |
| 1874                                                                                             | -                | LysM domain protein                                                | 19.8               | 1.03E-70               |
| 2043                                                                                             | <i>pcsB</i>      | Secreted putative N-acetylmuramoyl-l-alanine amidase/endopeptidase | 4.1                | 2.80E-28               |
| <b>Stress protein</b>                                                                            |                  |                                                                    |                    |                        |
| 0308                                                                                             | <i>clpL</i>      | ATP-dependent Clp protease, ATP-binding subunit                    | 1.9                | 8.51E-03               |
| 0458                                                                                             | <i>hrcA</i>      | Heat-inducible transcription repressor                             | 1.8                | 3.46E-05               |
| 0459                                                                                             | <i>grpE</i>      | Heat shock protein GrpE                                            | 2.3                | 2.15E-03               |
| 0460                                                                                             | <i>dnaK</i>      | Molecular chaperone DnaK                                           | 2.3                | 1.87E-09               |
| <b>Others</b>                                                                                    |                  |                                                                    |                    |                        |
| 0775                                                                                             | -                | Hypothetical protein                                               | 2.0                | 1.21E-02               |
| 0803                                                                                             | -                | Hypothetical protein                                               | 2.7                | 1.48E-05               |
| 1167                                                                                             | -                | ABC transporter, ATP-binding protein                               | 1.8                | 3.80E-03               |
| 1196                                                                                             | <i>mecA</i>      | Adaptor protein                                                    | 1.9                | 7.53E-03               |
| 1984                                                                                             | -                | Hypersensitive-induced reaction protein 4                          | 2.6                | 5.99E-06               |
| <b>Decreased relative transcript amounts</b>                                                     |                  |                                                                    |                    |                        |
| 0492                                                                                             | -                | Acetyltransferase, GNAT family protein                             | -2.3               | 1.21E-02               |
| 0675 <sup>c</sup>                                                                                | <i>khpA</i>      | KH domain protein                                                  | -366.0             | 1.77E-32               |
| 0720                                                                                             | -                | Amino acid ABC transporter, ATP-binding protein                    | -2.0               | 4.31E-04               |
| 0887                                                                                             | -                | Amino acid permease family protein                                 | -1.9               | 3.67E-02               |
| 0888                                                                                             | <i>lmb</i>       | Adhesion lipoprotein                                               | -2.2               | 1.77E-02               |
| 0889                                                                                             | <i>phtD</i>      | Pneumococcal histidine triad protein D precursor                   | -2.0               | 2.77E-08               |

<sup>a</sup>RNA preparation and mRNA-Seq analyses were performed as described in

Experimental procedures. RNA was prepared from cultures of strains IU1824 (WT) and

IU9036 ( $\Delta khpA$ ) grown exponentially in BHI broth to OD<sub>620</sub> to  $\approx 0.15-0.2$ . Fold changes

130 and false discovery rates (FDR) are based on three independent biological replicates.  
131 Cut-off limits were 1.8-fold and an FDR value<0.05. Complete mRNA-Seq procedures  
132 and data are deposited in the GEO database (accession number GSE101583).

133

134

135 Because of its size, “**Table S4**. KhpA and KhpB RIP-Seq results” is appended to the  
136 end of the Supplemental Materials.

137

## SUPPLEMENTAL FIGURE LEGENDS

**Fig. S1.** Model of PG biosynthesis in ovococcus bacteria, such as *S. pneumoniae*, and topology of proteins involved in peripheral PG synthesis. **(A)** Top. Ovococci divide perpendicularly to their long axis (Zapun *et al.*, 2008). Unencapsulated derivatives of serotype 2 strain D39 *S. pneumoniae* form mostly diplococci and chains of two cells, whereas capsulated D39 strains form short chains of 8–10 cells (Barendt *et al.*, 2009). Bottom. Formation of prolate-ellipsoid-shaped bacteria requires two modes of PG synthesis, peripheral (sidewall-like) and septal PG synthesis, that occur in the midcell region of dividing *S. pneumoniae* cells (Zapun *et al.*, 2008, Sham *et al.*, 2012, Massidda *et al.*, 2013, Pinho *et al.*, 2013, Fleurie *et al.*, 2014, Tsui *et al.*, 2014,). At the start of a division cycle, components of both peripheral PG synthesis complexes (orange ovals) and septal synthesis complexes (green rectangles) locate to the equators of cells (bottom). Peripheral PG synthesis (light blue; top) occurs between the future equator and septum of dividing cells and may commence before septal synthesis (Zapun *et al.*, 2008, Wheeler *et al.*, 2011, Massidda *et al.*, 2013). At some point, septal PG synthesis (medium blue) commences to divide the cell in two. The complexes that carry out peripheral and septal PG synthesis locate to a large constricting ring throughout the division cycle, with the exception of PBP2x, which moves to the centers of septa in mid-to-late divisional cells (Tsui *et al.*, 2014, Rued *et al.*, 2017). The grey Pac-Man symbol corresponds to PG hydrolases that remodel the PG and allow septal separation. Reproduced from (Tsui *et al.*, 2016). **(B)** Topology of proteins (not drawn to scale) known or speculated to be involved in peripheral PG synthesis in ovococci (Massidda *et al.*, 2013, Philippe *et al.*, 2014,). Involvement of RodA (bPBP2b regulator/flippase/PG

161 transglycosylase), bPBP2b (PG transpeptidase), MltG (endo-lytic transglycosylase),  
162 aPBP1a (PG transglycosylase and transpeptidase), and CozE, MreC, MreD, and RodZ  
163 (regulators) in peripheral PG synthesis in *Streptococcus pneumoniae* was shown  
164 experimentally in previous studies (Land & Winkler, 2011, Berg *et al.*, 2013, Massidda  
165 *et al.*, 2013, Philippe *et al.*, 2014, Tsui *et al.*, 2014, Fenton *et al.*, 2016, Tsui *et al.*, 2016,  
166 Rued *et al.*, 2017, Straume *et al.*, 2017). Figure was modified from Tsui *et al.*, 2016.  
167 See text for additional details.

168 **Fig. S2.** KhpA and KhpB are conserved in important Gram-positive pathogenic  
169 bacteria. Partial evolutionary trees are shown for widely distributed KhpA (top) and  
170 KhpB (bottom). Sequences of KhpA and KhpB homologs were found in the NCBI  
171 database by BLAST searches. Evolutionary trees were generated for a subset of the  
172 homologs by using the Phylogeny program (<http://www.phylogeny.fr/>).

173 **Fig. S3.**  $\Delta khpA$  reduces growth rate and cell size of encapsulated D39 and TIGR4  
174 *Streptococcus pneumoniae* strains. **A.** Growth curves with doubling times (DT) in BHI  
175 broth of encapsulated D39 *cps*<sup>+</sup> wild-type (WT) (IU1690) and  $\Delta khpA$  *cps*<sup>+</sup> (IU9600)  
176 strains. **B.** Representative phase-contrast images of encapsulated D39 WT and  $\Delta khpA$   
177 strains. **C.** Growth curves with doubling times (DT) in BHI broth of encapsulated TIGR4  
178 *cps*<sup>+</sup> WT (IU11966) and *cps*<sup>+</sup>  $\Delta khpA$  (IU13483) strains. **D.** Representative phase-  
179 contrast images of encapsulated TIGR4 WT and  $\Delta khpA$  strains. Growth and microscopy  
180 of exponentially growing cells were performed as described for Figure 2. The  
181 experiment was performed twice with similar results. Scale bar = 1  $\mu$ m.

182 **Fig. S4.** The *mltG*(Y488D)  $\Delta khpA$  double mutant grows slower than either  
183 *mltG*(Y488D) or  $\Delta khpA$  single mutant. Growth curves with doubling times (DT) in BHI

184 broth of wild-type (WT) (IU1824),  $\Delta khpA$  (IU9036), *mltG*(Y488D) (IU9760),  $\Delta khpA$   
185 *mltG*(Y488D) (IU12288) strains were determined as described for Figure 2. The  
186 experiment was performed three times with similar results.

187 **Fig. S5.**  $\Delta khpA$  suppresses  $\Delta pbp2b$ ,  $\Delta mreCD$ ,  $\Delta rodZ$ ,  $\Delta rodA$ , and  $\Delta gpsB$  mutations  
188 in the D39 genetic background. WT (IU1824),  $\Delta khpA$  (IU9036),  $\Delta khpA \Delta pbp2b$   
189 (IU9763),  $\Delta khpA \Delta mreCD$  (IU10657),  $\Delta khpA \Delta rodZ$  (IU10659),  $\Delta khpA \Delta rodA$   
190 (IU13436), and  $\Delta khpA \Delta gpsB$  (IU12883) mutants were used in these experiments. **A.**  
191 Growth curves in BHI broth. Doubling times (DT) were calculated from 3 independent  
192 growth curves for cells growing exponentially ( $OD_{620}=0.03-0.3$ ). Growth curves and  
193 doubling times were comparable for  $\Delta khpB$  single and  $\Delta khpB (\Delta pbp2b; \Delta mreCD;$   
194  $\Delta rodZ;$  or  $\Delta rodA)$  double mutants (data not shown). **B.** Representative phase-contrast  
195 images of cells in early exponential phase ( $OD_{620}= 0.10-0.15$ ). The median aspect ratio  
196 (AR) and relative cell volume (RV) are indicated for the WT,  $\Delta khpA$ , and  $\Delta khpA \Delta pbp2b$   
197 mutants determined from 2 independent experiments as described in Figure 2D. Scale  
198 bar = 1  $\mu m$ .

199 **Fig. S6.** Absence of growth and morphology defects of strains expressing KhpA-L-  
200 FLAG<sup>3</sup> or KhpB-L-FLAG<sup>3</sup> from their native chromosomal loci. **A.** Growth curves in BHI  
201 broth of wild-type (WT) (IU1945), *khpA*-L-FLAG<sup>3</sup> (IU9602), and *khpB*-L-FLAG<sup>3</sup>  
202 (IU10664) strains. **B.** Representative phase-contrast images of WT, *khpA*-L-FLAG<sup>3</sup>, and  
203 *khpB*-L-FLAG<sup>3</sup> strains. Growth and microscopy of exponentially growing cells were  
204 performed as described for Figure 2. The experiment was performed twice with similar  
205 results. Scale bar = 1  $\mu m$ .

206 **Fig. S7.** Similar growth and cell morphology of the  $\Delta khpA \Delta khpB$  double and  $\Delta khpA$   
207  $\Delta khpB \Delta pbp2b$  triple mutants. **A.** Growth curves with doubling times (DT) in BHI broth of  
208 WT (IU1824),  $\Delta khpA \Delta khpB$  (IU10596), and  $\Delta khpA \Delta khpB \Delta pbp2b$  (IU10626) strains.  
209 **B.** Representative phase-contrast images of WT,  $\Delta khpA \Delta khpB$ , and  $\Delta khpA \Delta khpB$   
210  $\Delta pbp2b$  strains. Growth and microscopy of exponentially growing cells were performed  
211 as described for Figure 2. The experiment was performed twice with similar results.  
212 Scale bar = 1  $\mu\text{m}$ .

213 **Fig. S8.** KhpA and KhpB co-localize at all stages of the bacterial cell cycle. **A.**  
214 Representative phase-contrast and fluorescence images of strain IU10602 (*khpA*-L-  
215 FLAG<sup>3</sup> *khpB*-HA) grown exponentially in BHI broth and processed for dual-protein 2D  
216 immunofluorescence microscopy IFM and DAPI labelling as described in Experimental  
217 procedures. **B.** Images of cells were binned into division stages 1–4, and images from  
218 the indicated number of cells (n) from two independent biological replicates were  
219 averaged using the IMA-GUI program as described previously (Land et al., 2013). Row  
220 1, cell shapes from phase-contrast images; row 2, nucleoid locations from DAPI  
221 labelling; row 3, KhpB locations from IFM; row 4, KhpA locations from IFM; row 5,  
222 normalized mean fluorescence intensity distributions along the horizontal cell axis for  
223 each channel (black, phase image; blue, DNA; green, KhpB; red, KhpA). Comparator 1  
224 from (Tsui et al., 2014). 2D IFM averages showing the co-localization of StkP and  
225 Pbp2b, which form distinct, highly localized rings during each division stage, in contrast  
226 to the diffuse localization of KhpA and KhpB in early divisional cells. **C.** Demographs of  
227 cell localization of KhpA (red), and KhpB (green). Cells were aligned based on lengths  
228 in phase-contrast images. Graph was generated by MicrobeJ (Ducret et al. 2016) for



229 609 cells. Comparator 2. FtsZ-Myc localization determined by 2D-IFM in a separate  
230 experiment, again showing much more distinctive localization of FtsZ than KhpA or  
231 KhpB.

232 **Fig. S9.** Protein phosphorylation is slightly reduced in  $\Delta khpA$ ,  $\Delta khpA$ , and  $\Delta khpA$   
233  $\Delta khpB$  mutants. Proteins phosphorylated on Thr residues were detected by Western  
234 blotting with anti-pThr antibody, and blots were imaged and quantitated as described in  
235 Experimental procedures. A representative blot is shown, with background-subtracted  
236 luminescence values (mean  $\pm$  SE; n=2) relative to the wild-type (WT) strain indicated for  
237 the StkP/LocZ and DivIVA bands. Lane 1: Ladder; lane 2, WT (IU1824); lane 3,  $\Delta khpA$   
238 (IU9036); lane 4,  $\Delta khpB$  (IU10592); and lane 5,  $\Delta khpA \Delta khpB$  (IU10596). The band  
239 above the DivIVA band in the WT and  $\Delta khpA$  samples, which disappeared in the  $\Delta khpB$   
240 and  $\Delta khpA \Delta khpB$  mutants, is phosphorylated KhpB (see Ulrych *et al.*, 2016).

241 **Fig. S10.** Phosphoablative and phosphomimetic amino acid changes of KhpB at  
242 Thr89 (see Fig. 1B) does not affect growth and cell morphology. **A.** Growth curves in  
243 BHI broth of wild-type (WT) (IU1824),  $\Delta khpB$  (IU10592),  $khpB(T89A)$  (IU12744),  
244  $khpB(T89D)$  (IU13881) and  $khpB(T89E)$  (IU13883) strains. **B.** Representative phase-  
245 contrast images of WT,  $\Delta khpB$ ,  $khpB(T89A)$ ,  $khpB(T89D)$  and  $khpB(T89E)$  strains.  
246 Growth and microscopy of exponentially growing cells were performed as described for  
247 Figure 2. The D39 experiment was performed twice with similar results. Scale bar = 1  
248  $\mu\text{m}$ .

249 **Fig. S11.** Amino acid changes in the KhpA(GXXG) motif destabilizes KhpA and  
250 results in a  $\Delta khpA$  phenotype. **A.** Representative Western blots of relative cellular  
251 amounts of KhpA-L-FLAG<sup>3</sup> in cells growing exponentially in BHI broth. Numbers are

252 luminescence values relative to the strain expressing wild-type (WT) KhpA-L-FLAG<sup>3</sup>  
253 from its native chromosomal locus. Lane 1, ladder; lane 2, untagged *khpA*<sup>+</sup> (IU1824)  
254 control; lane 3, WT *khpA*-L-FLAG<sup>3</sup> (IU9697); lane 4, *khpA*(G49A)-L-FLAG<sup>3</sup> (IU9939);  
255 lane 5, *khpA*(G52A)-L-FLAG<sup>3</sup> (IU9941); lane 6, *khpA*(G49A G52A)-L-FLAG<sup>3</sup> (IU9979);  
256 and lane 7, *khpA*(R50D K51D)-L-FLAG<sup>3</sup> (IU10092). **B.** Growth curves with doubling  
257 times (DT) in BHI of untagged *khpA* mutants: wild-type (WT) IU1824,  $\Delta$ *khpA* (IU9036),  
258 *khpA*(G49A) (IU9935), *khpA*(G52A) (IU9932), *khpA*(G49A G52A) (IU9977) and  
259 *khpA*(R50D K51D) (IU10091) strains. Growth curves were determined as described for  
260 Figure 2.

261 **Fig. S12.** RIP-qRT-PCR control confirms results and specificity of RIP-Seq  
262 experiments. WT (IU1945), *spd\_1366*-L-FLAG<sup>3</sup> (IU5809), *khpA*-L-FLAG<sup>3</sup> (IU9602), and  
263 *khpB*-L-FLAG<sup>3</sup> (IU10664) strains were used in RIP experiments as described in  
264 Experimental procedures. Extracted RNA was reversed transcribed to cDNA and used  
265 as templates for qRT-PCR as described in the Experimental procedures. Primers for  
266 qRT-PCR are listed in Table S1. The relative amounts of the *spd\_0023* and *spd\_2067*  
267 transcripts were significantly enriched by binding to KhpA-L-FLAG<sup>3</sup> or KhpB-L-FLAG<sup>3</sup>  
268 compared to the untagged control, similar to the result obtained by RIP-Seq (Table  
269 S4A). In contrast, a third putative RNA binding protein, Spd\_1366-L-FLAG<sup>3</sup>, did not  
270 enrich for binding of the *spd\_0023* and *spd\_2067* transcripts. Means  $\pm$  SE are shown  
271 from three independent experiments. \*\*\*P<0.01.

272 **Fig. S13.** FtsA is overproduced in the  $\Delta$ *pbp2b sup6* strain. Western blots of FtsA  
273 was performed for the wild-type WT (IU1824),  $\Delta$ *khpA* (IU9036),  $\Delta$ *pbp2b sup6* (IU12015;  
274 Table S2) strains growing exponentially in BHI broth as described in Experimental

275 procedures.  $\Delta pbp2b$  *sup6* contains the tandem chromosomal duplication shown in  
276 Figure 6. Numbers shown are luminescence intensities relative to the WT strain for this  
277 experiment. Western blots of FtsA from the  $\Delta khpA$  mutant were performed numerous  
278 times (Fig. 8 and S15; Table 1). The experiment for the  $\Delta pbp2b$  *sup6* strain was done  
279 twice with similar results.

280 **Fig. S14.** Relative cellular amount of FtsZ is increased by  $\approx 1.9$ -fold by ectopic  
281 overexpression. Western blots of FtsZ were performed as described in Experimental  
282 procedures for strains growing exponentially in BHI broth. Where indicated (+Zn), 0.5  
283 mM  $ZnCl_2$  + 0.05 mM  $MnSO_4$  were added to the BHI broth. The following strains were  
284 assayed: wild-type (WT) (IU1945),  $ftsZ^+//P_{ftsA}-ftsZ^+$  (IU7054),  $\Delta ftsZ//P_{ftsA}-ftsZ^+$  (IU7814),  
285 and  $ftsZ^+//P_{Zn}-ftsZ^+$  (IU8122). In strain IU7054, ectopic expression of FtsZ is constitutive  
286 from the  $P_{ftsA}$  promoter, while in strain IU8122, ectopic expression of FtsZ is induced by  
287 Zn addition. Ectopic overexpression of *ftsZ* from IU7054, IU8122, or IU12286 failed to  
288 suppress  $\Delta sup2b$  (Table 1, line 23; data not shown).

289 **Fig. S15.** Ectopic overexpression of *ftsA* does not change relative cellular FtsZ  
290 amount. Western blots of the relative amounts of FtsA, FtsZ, and MreC (control) were  
291 performed as described in Experimental procedures for cells growing exponentially in  
292 BHI broth. The following strains were assayed: wild-type (WT) (IU1824);  $\Delta khpA$   
293 (IU9036); and  $ftsA^+//P_{Zn}-ftsA^+$  (IU12310). Where indicated (+Zn), 0.5 mM  $ZnCl_2$  + 0.05  
294 mM  $MnSO_4$  were added to the BHI broth. Numbers shown are luminescence intensities  
295 relative to the WT strain for this experiment.

296 **Fig. S16.** FtsA overproduction partially contributed to the phenotypes of  $\Delta khpA$   
297 mutant. WT (IU1824),  $\Delta khpA$  (IU9036), and  $ftsA^+//P_{Zn}-ftsA^+$  (IU12310) strains were used

298 in these experiments. -Zn (no addition) or +Zn (addition) of 0.5 mM ZnCl<sub>2</sub> and 0.05 mM  
299 MnSO<sub>4</sub> to final cultures. **A.** Representative phase-contrast images of cells of WT,  
300 *ftsA*<sup>+</sup>//P<sub>Zn</sub>-*ftsA*<sup>+</sup>, and  $\Delta$ *khpA* mutants grown exponentially in BHI broth with or without  
301 added Zn. Cells were sampled in early exponential phase (OD<sub>620</sub> ≈0.10-0.15) from  
302 cultures that grew similar to the WT strain with or without added Zn (see Fig. 5B).  
303 Addition of Zn to the *ftsA*<sup>+</sup>//P<sub>Zn</sub>-*ftsA*<sup>+</sup> strain caused a 2.6-fold overexpression of FtsA  
304 amount compared to the no Zn addition or the WT strain (see Table 2, lines 1, 2, 5, and  
305 6). Scale bar = 1 μm. **B.** Box and whisker plots (where whiskers indicate 5-95  
306 percentile) of median distributions of cell length, width, aspect ratio (length/width), and  
307 relative cell volume of strains growing exponentially in BHI broth with and without Zn  
308 addition. Over 100 cells were measured per strain in two independent experiments. **C.**  
309 Relative transcript amount of *spd\_1874*, which is in the WalRK TCS cell-wall stress  
310 regulon, determined by qRT-PCR as described in Experimental procedures. Averages ±  
311 SE are shown from 3 independent experiments. For B and C, P values were obtained  
312 relative to WT by one-way ANOVA analysis. \*\* P<0.01 and \*\*\* P<0.001.

313 **Fig. S17.** Linearity of signal intensity in Western blots versus protein amount in  
314 lysates. for FtsA, FtsZ, and MreC. Cell lysates from the wild-type strain (IU1824) were  
315 serially diluted, and different amounts of total lysate protein (1.25, 2.50, 5.00, and 10.0  
316 μg) were subjected to Western blotting with detection using anti-FtsA, anti-FtsZ, or anti-  
317 MreC antibodies as described in Experimental procedures. The calibration was  
318 performed three times independently for each protein. Linear regression was performed  
319 using GraphPad Prism program. R<sup>2</sup> values of the fitted lines are >0.96.

320 **Fig. 18.** JBrowse profile illustrating enrichment of mRNA near the 5'-UTR and start  
321 codon of *ftsA* and mRNA of *sepF* by KhpA-L-FLAG<sup>3</sup> or KhpB-L-FLAG<sup>3</sup> pull down in RIP-  
322 Seq experiments compared to the wild-type (WT) control strain, which does not express  
323 a FLAG<sup>3</sup>-tagged protein. Results from the repeated, independent experimental samples  
324 are shown. The JBrowse window from *spd\_1481* to *yImH* indicates that there was no  
325 enrichment of *ftsZ* mRNA by KhpA-L-FLAG<sup>3</sup> or KhpB-L-FLAG<sup>3</sup> pull down. Figure S12  
326 shows control experiments that confirm the results and specificity of the RIP-Seq  
327 experiments, which are tabulated in Table S4.

328 **Fig. 19.**  $\Delta khpA$  and  $\Delta khpB$  mutants are slightly more resistant to gentamicin, but  
329 have the same sensitivities to  $\beta$ -lactam antibiotics or tetracycline as the wild-type (WT)  
330 strain. Disk diffusion assays were performed as described in Experimental procedures  
331 for strains WT (IU1824),  $\Delta khpA$  (IU9036),  $\Delta khpB$  (IU10592), and  $\Delta khpA \Delta khpB$   
332 (IU10596) strains. Means  $\pm$  SE are shown from three independent experiments.  
333 \*\*\*P<0.001.

334 **Fig. S20.** The  $\Delta khpA \Delta walk$  double mutant grows slower than either  $\Delta walk$  or  
335  $\Delta khpA$  single mutant. Growth curves with doubling times (DT) in BHI broth of wild-type  
336 (WT) (IU1824),  $\Delta khpA$  (IU9036),  $\Delta walk$  (IU10230), and  $\Delta khpA \Delta walk$  (IU10080) strains  
337 were determined as described for Figure 2. The experiment was performed twice with  
338 similar results.

339 **Fig. S21.** KhpB overproduction does not alter growth and cell morphology of D39-  
340 derived strains. **A.** Growth curves of wild-type (WT) (IU1824) and  $khpB^+//P_{Zn}-khpB^+$   
341 (IU14024) strains in BHI with or without additional of 0.5 mM ZnCl<sub>2</sub> + 0.05 mM MnSO<sub>4</sub>  
342 (+Zn). **B.** Representative phase-contrast images of WT and  $khpB^+//P_{Zn}-khpB$  strains

343 growing in BHI with or without Zn addition. Growth and microscopy of exponentially  
344 growing cells were performed as described for Figure 2. The experiment was performed  
345 twice with similar results. Scale bar = 1  $\mu$ m.

## 347 REFERENCES

348 Barendt, S.M., Land, A.D., Sham, L.T., Ng, W.L., Tsui, H.C., Arnold, R.J., Winkler,  
349 M.E. (2009) Influences of capsule on cell shape and chain formation of wild-type and  
350 *pcsB* mutants of serotype 2 *Streptococcus pneumoniae*. *J Bacteriol* **191**: 3024-3040.

351  
352 Berg, K.H., Stamsas, G.A., Straume D., Havarstein, L.S. (2013) Effects of low  
353 PBP2b levels on cell morphology and peptidoglycan composition in *Streptococcus*  
354 *pneumoniae* R6. *J Bacteriol* **195**: 4342-4354.

355  
356 Ducret, A., Quardokus, E. M., Brun, Y. V. (2016) MicrobeJ, a tool for high throughput  
357 bacterial cell detection and quantitative analysis. *Nat Microbiol* **1**: 16077

358  
359 Eberhardt, A., L.J. Wu, J. Errington, W. Vollmer & J.W. Veening, (2009) Cellular  
360 localization of choline-utilization proteins in *Streptococcus pneumoniae* using novel  
361 fluorescent reporter systems. *Mol Microbiol* **74**: 395-408.

362  
363 Fenton, A. K., Mortaji L, E. I., Lau, D. T., Rudner, D. Z., Bernhardt, T. G. (2017)  
364 CozE is a member of the MreCD complex that directs cell elongation in  
365 *Streptococcus pneumoniae*. *Nat Microbiol* **2**: 16237

366  
367 Fleurie, A., Manuse, S., Zhao, C., Campo, N., Cluzel, C., Lavergne, J.P. *et al.* (2014)  
368 Interplay of the serine/threonine-kinase StkP and the paralogs DivIVA and GpsB in  
369 pneumococcal cell elongation and division. *PLoS Genet* **10**: e1004275

370  
371 Land, A.D., Winkler, M.E. (2011) The requirement for pneumococcal MreC and  
372 MreD is relieved by inactivation of the gene encoding PBP1a. *J Bacteriol* **193**: 4166-  
373 4179.

374  
375 Land, A.D., Tsui, H.C., Kocaoglu, O., Vella, S.A., Shaw, S.L., Keen, S.K. *et al.*  
376 (2013) Requirement of essential Pbp2x and GpsB for septal ring closure in  
377 *Streptococcus pneumoniae* D39. *Mol Microbiol* **90**: 939-955.

378  
379 Lanie, J.A., Ng, W.L., Kazmierczak, K.M., Andrzejewsk, T.M., Davidsen, T.M.,  
380 Wayne, K.J., *et al.* (2007) Genome sequence of Avery's virulent serotype 2 strain  
381 D39 of *Streptococcus pneumoniae* and comparison with that of unencapsulated  
382 laboratory strain R6. *J Bacteriol* **189**: 38-51.

385 Massidda, O., Novakova, L., Vollmer, W. (2013) From models to pathogens: how  
386 much have we learned about *Streptococcus pneumoniae* cell division? *Environ*  
387 *Microbiol* **15**: 3133-3157.

388 Mura, A., Fadda, D., Perez, A.J., Danforth, M.L., Musu, D., Rico, A.I., *et al.* (2017)  
389 Roles of the essential protein FtsA in cell growth and division in *Streptococcus*  
390 *pneumoniae*. *J Bacteriol* **199**: e00608-16.

391 Philippe, J., Vernet, T., Zapun, A. (2014) The elongation of ovococci. *Microbiol Drug*  
392 *Resist* **20**: 215-221.

393 Pinho, M.G., Kjos, M., Veening, J.W. (2013) How to get (a)round: mechanisms  
394 controlling growth and division of coccoid bacteria. *Nat Rev Microbiol* **11**: 601-614.

395 Ramos-Montanez, S., Tsui, H.C., Wayne, K.J., Morris, J.L., Peters, L.E., Zhang, F.,  
396 *et al.* (2008). Polymorphism and regulation of the *spxB* (pyruvate oxidase) virulence  
397 factor gene by a CBS-HotDog domain protein (SpxR) in serotype 2 *Streptococcus*  
398 *pneumoniae*. *Mol Microbiol* **67**: 729-746.

399 Rued, B. E., Zheng, J. J., Mura, A., Tsui, H. T., Boersma, M. J., Mazny, J. L., *et al.*  
400 (2017) Suppression and synthetic-lethal genetic relationships of  $\Delta$ *gpsB* mutations  
401 indicate that GpsB mediates protein phosphorylation and penicillin-binding protein  
402 interactions in *Streptococcus pneumoniae* D39. *Mol Microbiol* **103**: 931-957

403 Sham, L.T., Tsui, H.C., Land, A.D., Barendt, S.M., Winkler, M.E. (2012) Recent  
404 advances in pneumococcal peptidoglycan biosynthesis suggest new vaccine and  
405 antimicrobial targets. *Curr Opin Microbiol* **15**: 194-203.

406 Straume, D. Stamsas, G. A., Berg, K. H., Salehian, Z., Harvarstein, L. S. (2017)  
407 Identification of pneumococcal proteins that are functionally linked to penicillin-  
408 binding protein 2b (PBP2b). *Mol Microbiol* **103**: 99-116.

409 Tsui, H.C., S.K. Keen, L.T. Sham, K.J. Wayne & M.E. Winkler, (2011) Dynamic  
410 distribution of the SecA and SecY translocase subunits and septal localization of the  
411 HtrA surface chaperone/protease during *Streptococcus pneumoniae* D39 cell division.  
412 *mBio* **2**: e00202-11.

413 Tsui, H.T., Moersma, M.J., Vella, S.A., Kocaoglu, O., Kuru, E., Peceny, J.K., *et al.*  
414 (2014). Pbp2x localizes separately from Pbp2b and other peptidoglycan synthesis  
415 proteins during later stages of cell division of *Streptococcus pneumoniae* D39. *Mol*  
416 *Microbiol* **94**: 21-40.

417 Tsui, H.C., Zheng, J.J., Magallon, A.N., Ryan, J.D., Yunck, R., Rued, B.E., *et al.*  
418 (2016). Suppression of a deletion mutation in the gene encoding essential PBP2b  
419 reveals a new lytic transglycosylase involved in peripheral peptidoglycan synthesis  
420 in *Streptococcus pneumoniae* D39. *Mol Microbiol* **100**: 1039-1065.

432 Wayne, K.J., Sham, L.T., Tsui, H.C., Gutu, A.D., Barendt, S.M., Keen, S.K., Winkler,  
433 M.E. (2010). Localization and cellular amounts of the WalRKJ (VicRKX) two-  
434 component regulatory system proteins in serotype 2 *Streptococcus pneumoniae*. *J*  
435 *Bacteriol* **192**: 4388-4394.

436  
437 Tettelin, H., Nelson, K.E., Paulsen, I.T., Eisen, J.A., Read, T.D., Peterson S., *et al.*  
438 (2001). Complete genome sequence of a virulent isolate of *Streptococcus*  
439 *pneumoniae*. *Science* **293**: 498-506

440 Wheeler, R., Mesnage, S., Boneca, I.G., Hobbs, J.K., Foster, S.J. (2011) Super-  
441 resolution microscopy reveals cell wall dynamics and peptidoglycan architecture in  
442 ovococcal bacteria. *Molec Microbiol* **82**: 1096-1109.

443  
444 Ulrych, A., N. Holeckova, J. Goldova, L. Doubravova, O. Benada, O. Kofronova, P.  
445 Halada & P. Branny, (2016) Characterization of pneumococcal Ser/Thr protein  
446 phosphatase phpP mutant and identification of a novel PhpP substrate, putative  
447 RNA binding protein Jag. *BMC Microbiol* **16**: 247.

448  
449 Wilson, I.A., Niman, H.L., Houghten, R.A., Cherenson, A.R., Connolly, M.L., Lerner,  
450 R.A. (1984) The structure of an antigenic determinant in a protein. *Cell* **37**: 767-778.

451  
452 Zapun, A., Vernet, T., Pinho, M.G. (2008) The different shapes of cocci. *FEMS*  
453 *Microbiol Rev* **32**: 345-360.

454  
455 Zheng, J.J., Sinha, D., Wayne, K.J., Winkler, M.E. (2016) Physiological roles of the  
456 dual phosphate transporter systems in low and high phosphate conditions and in  
457 capsule maintenance of *Streptococcus pneumoniae* D39. *Front Cell Infect Microbiol*  
458 **6**:63. doi: 10.3389/fcimb.



**A**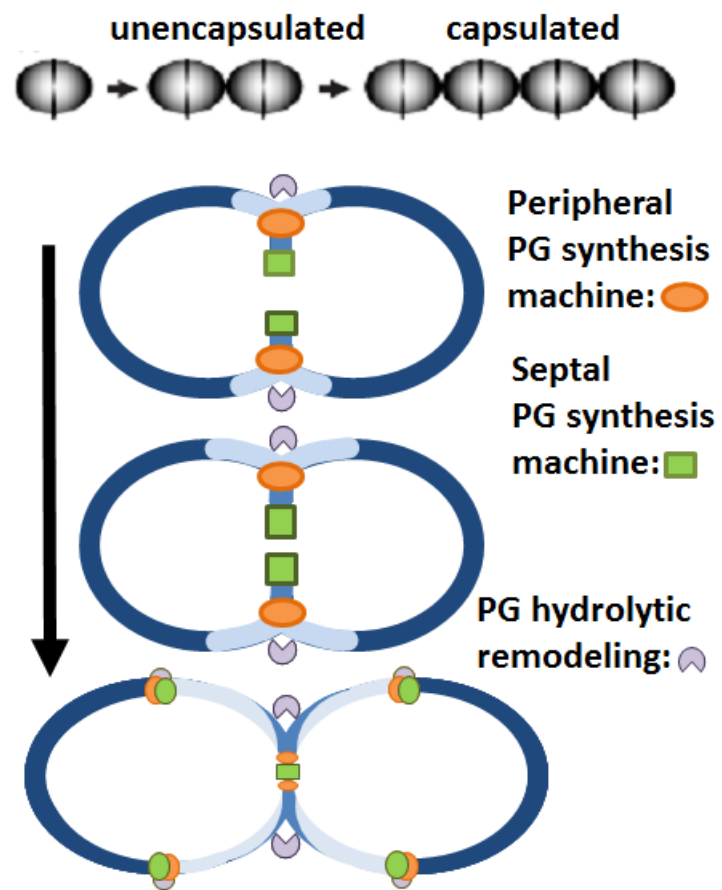**B**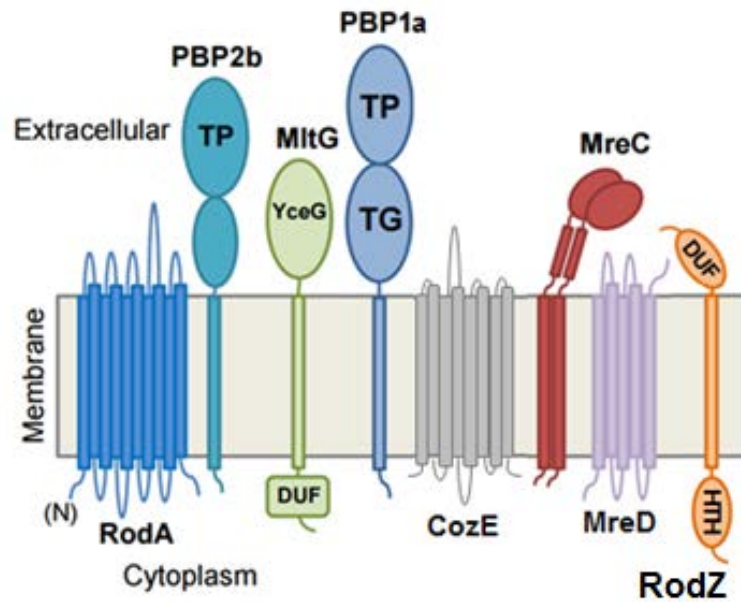

Fig. S1

# Partial Trees

## KhpA

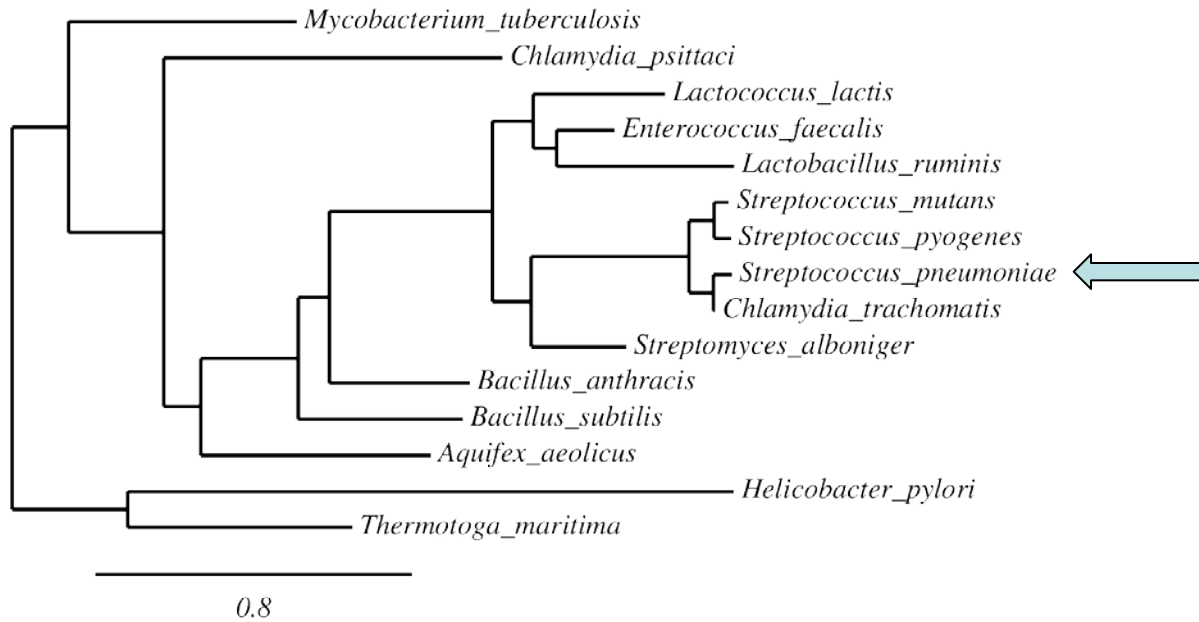

## KhpB

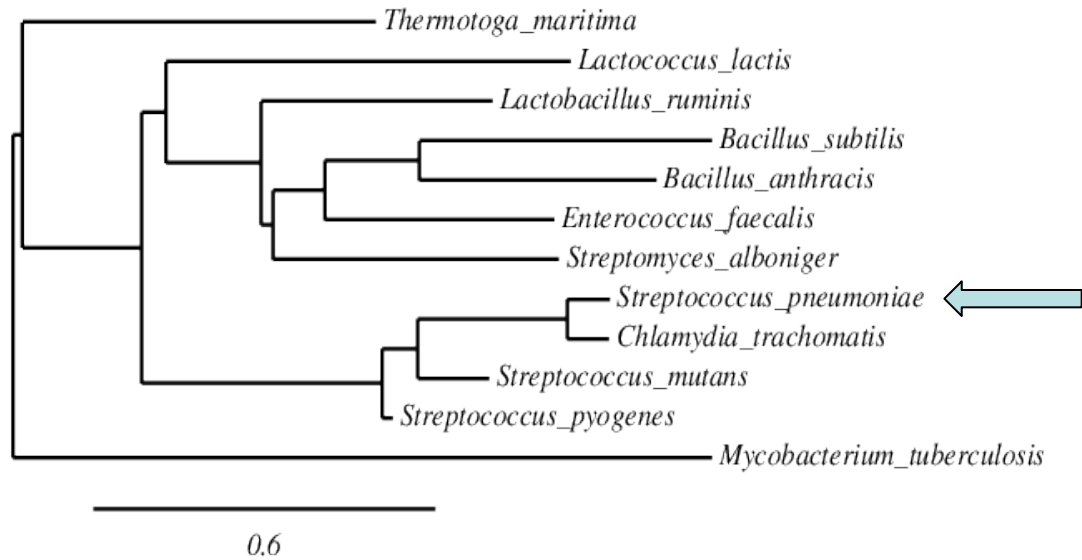

Fig. S2

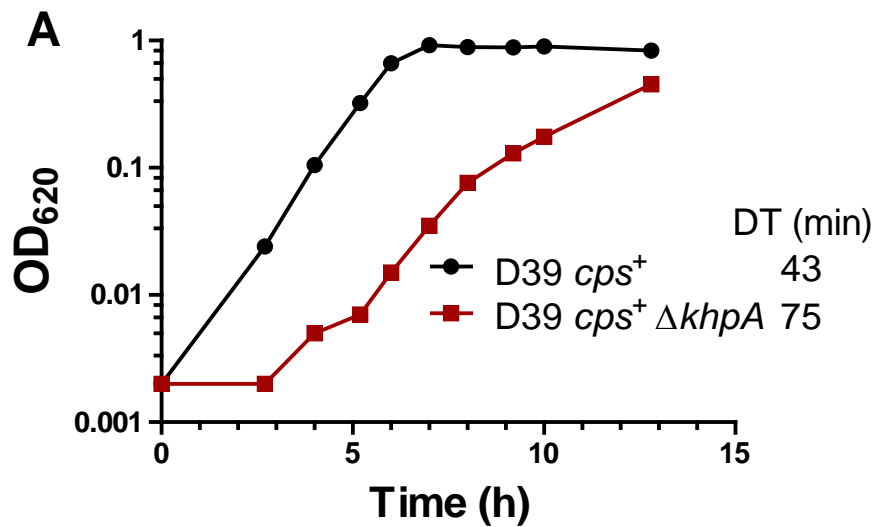

**B**

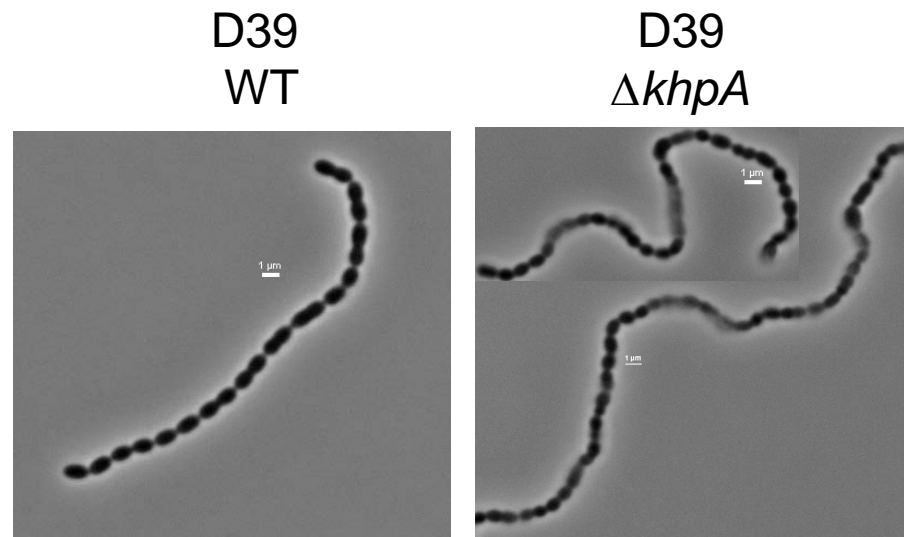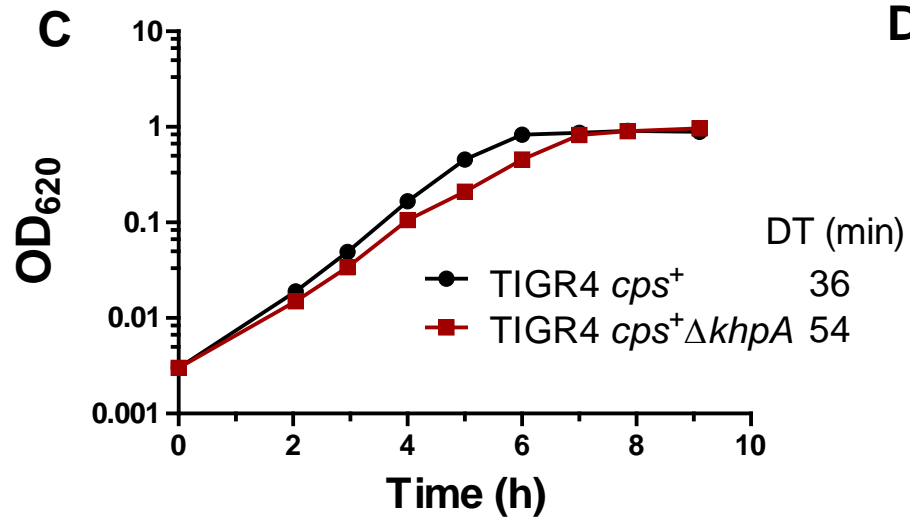

**D**

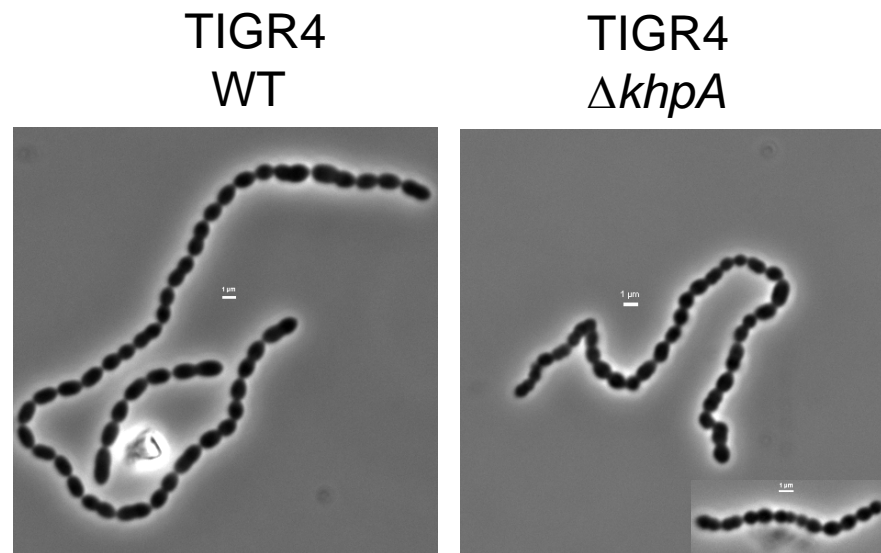

Fig. S3

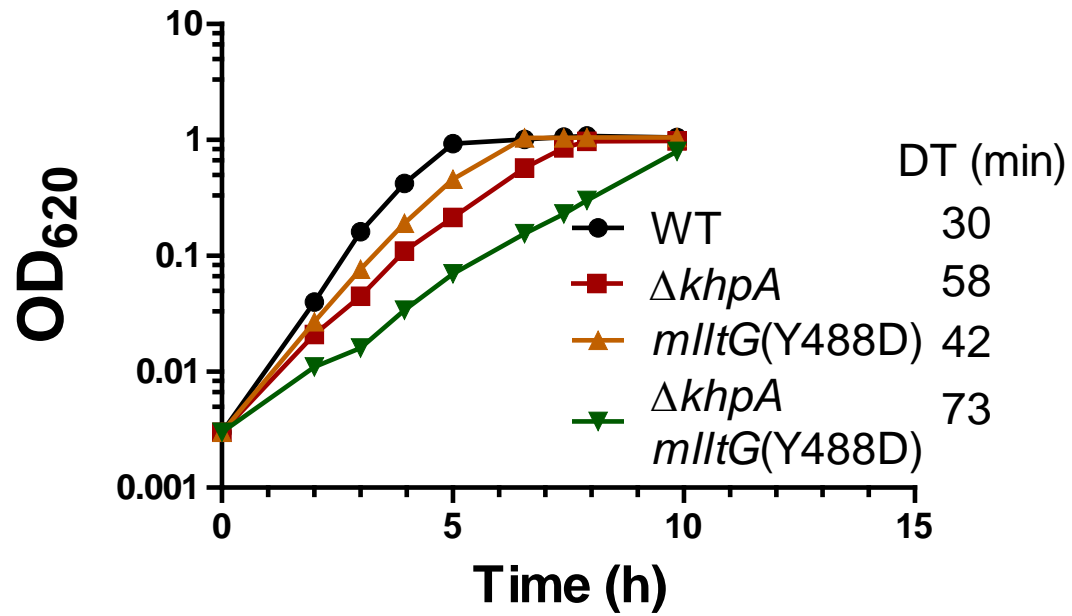

Fig. S4

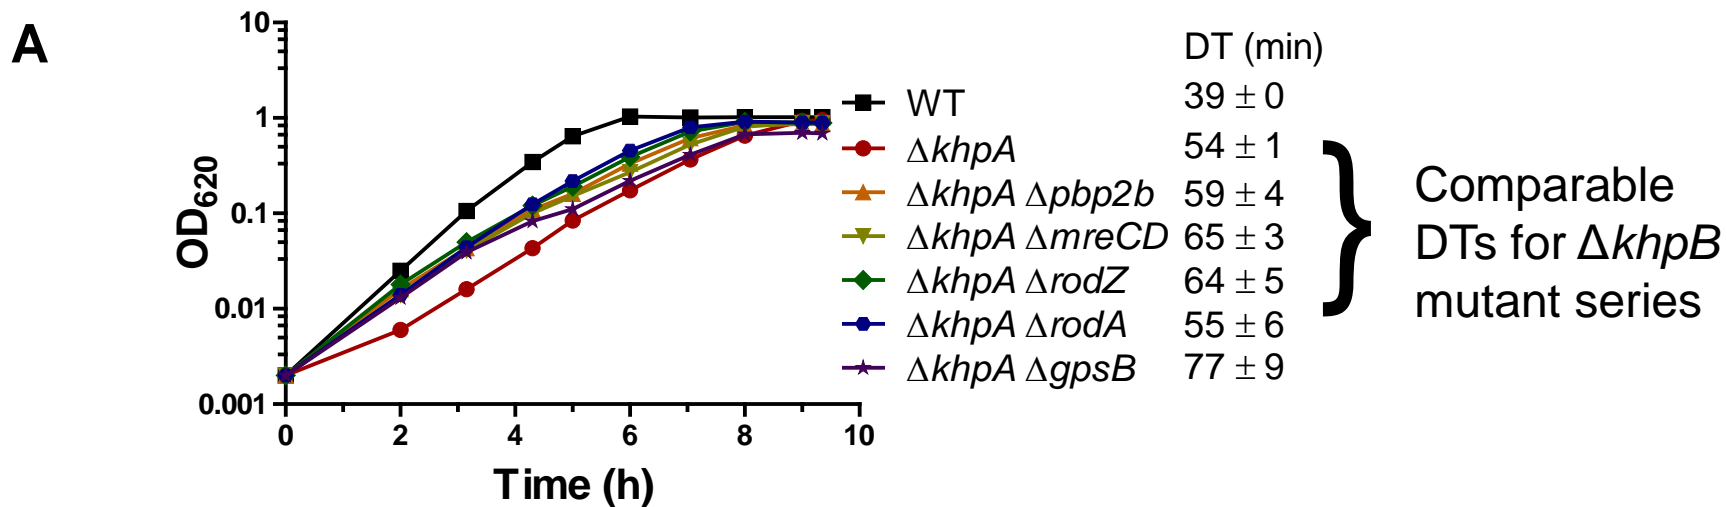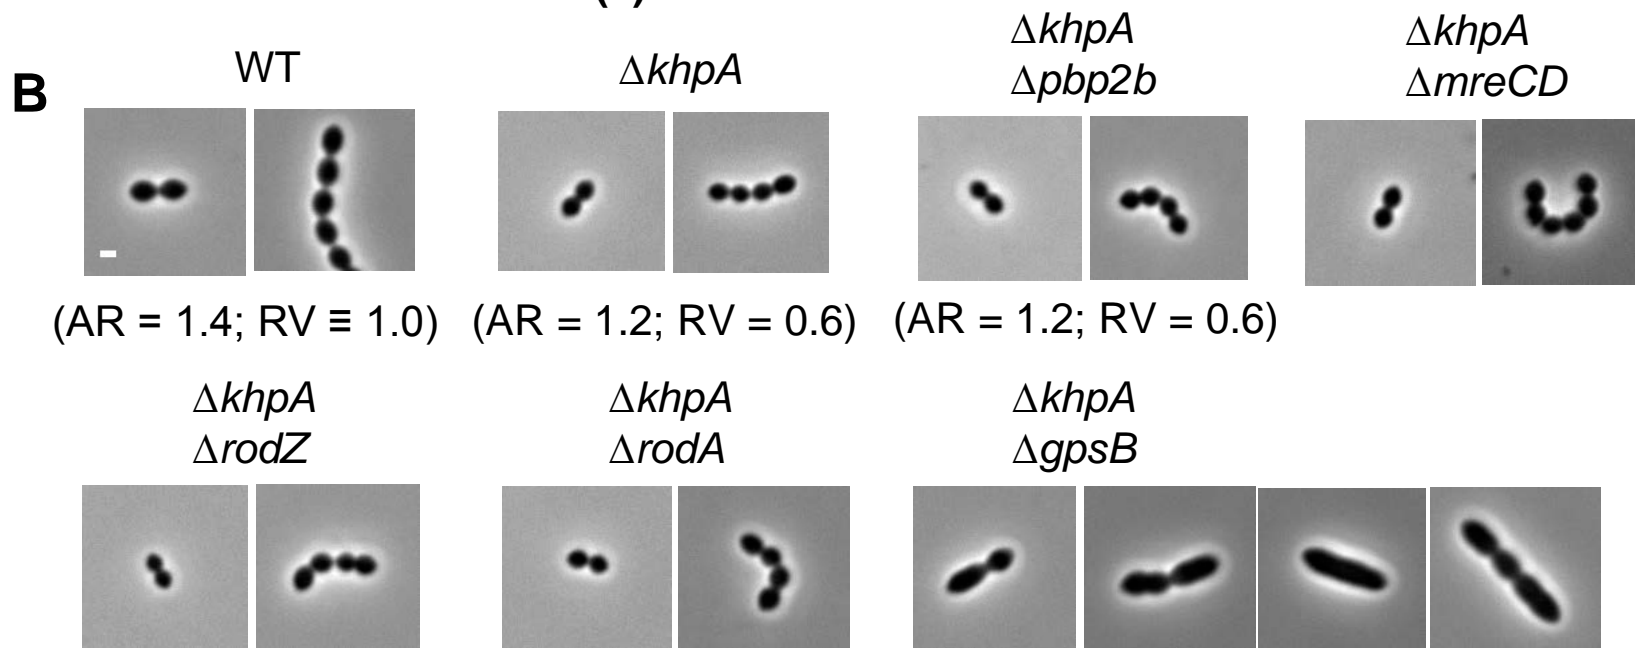

Fig. S5

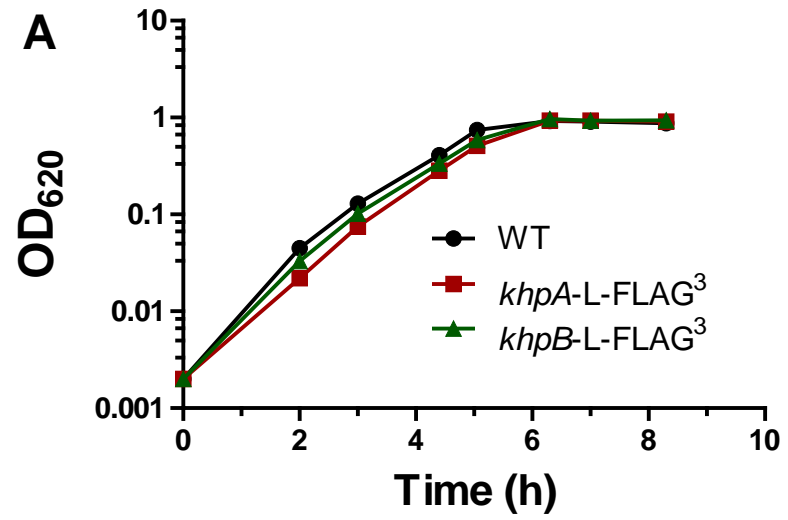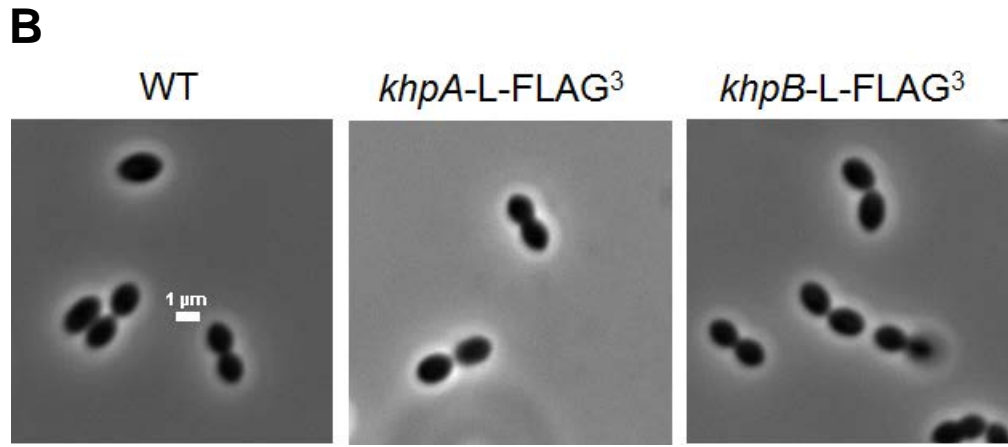

Fig. S6

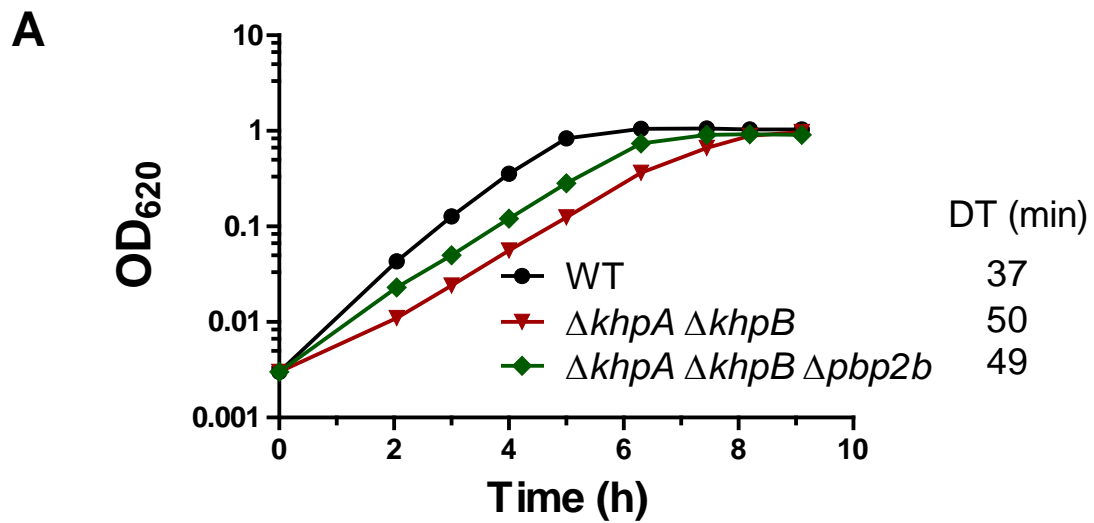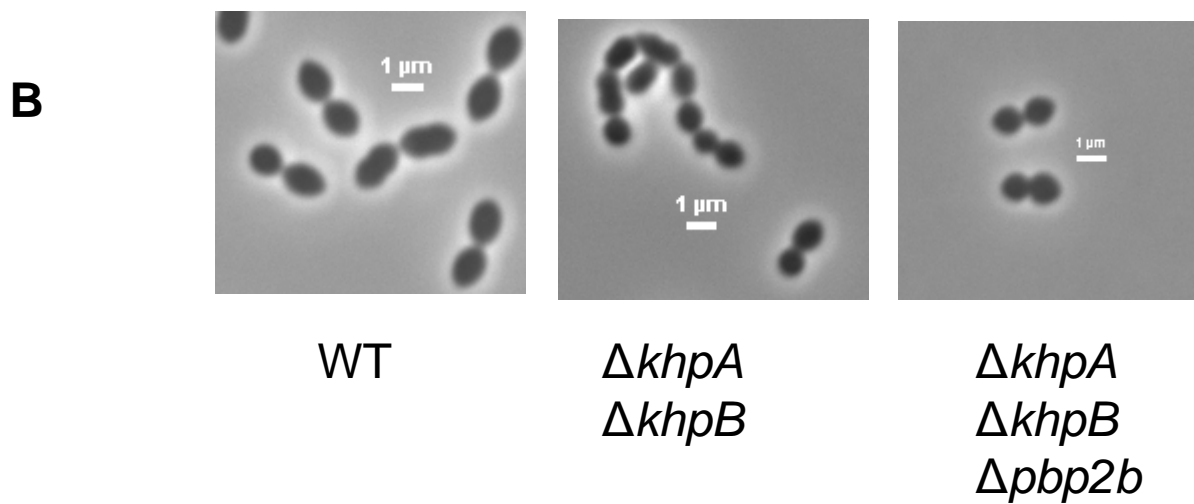

Fig. S7

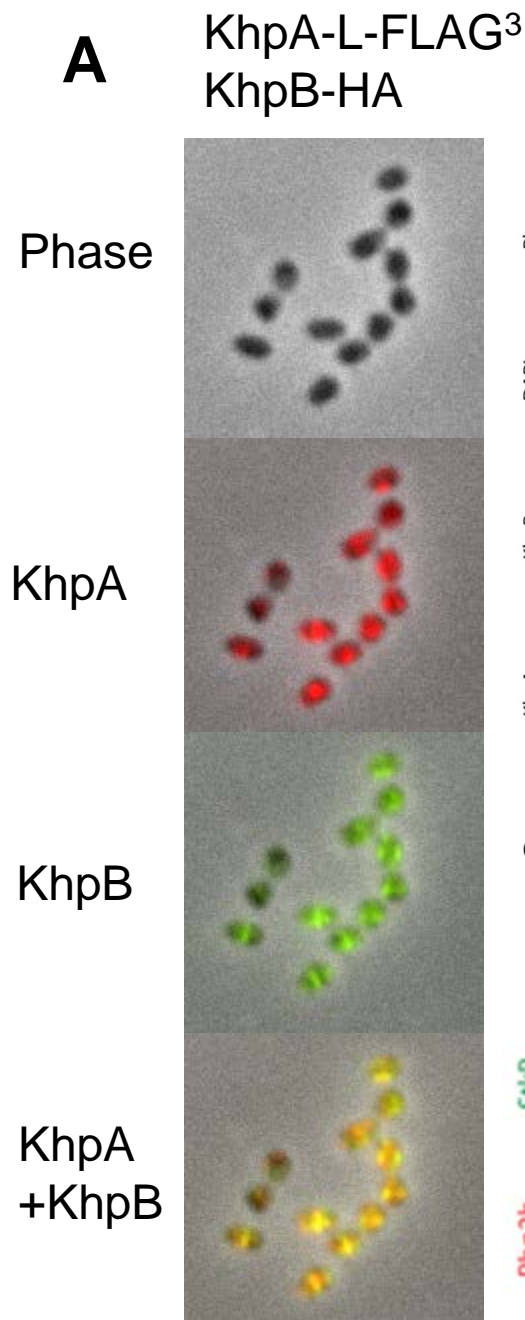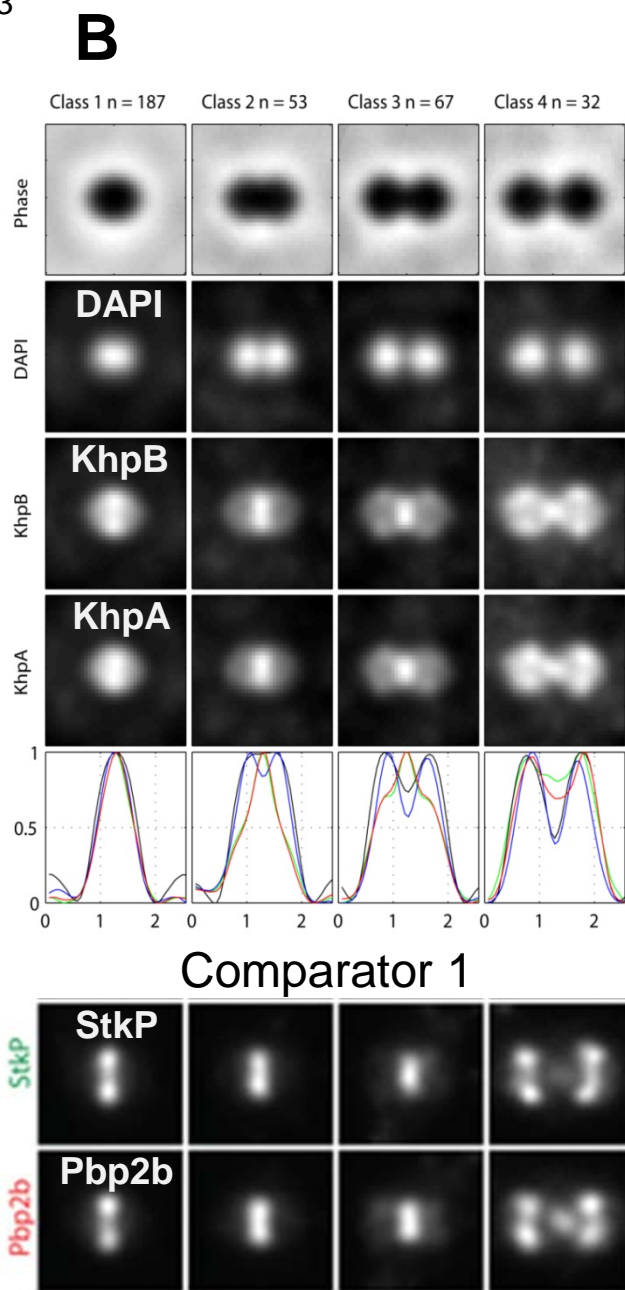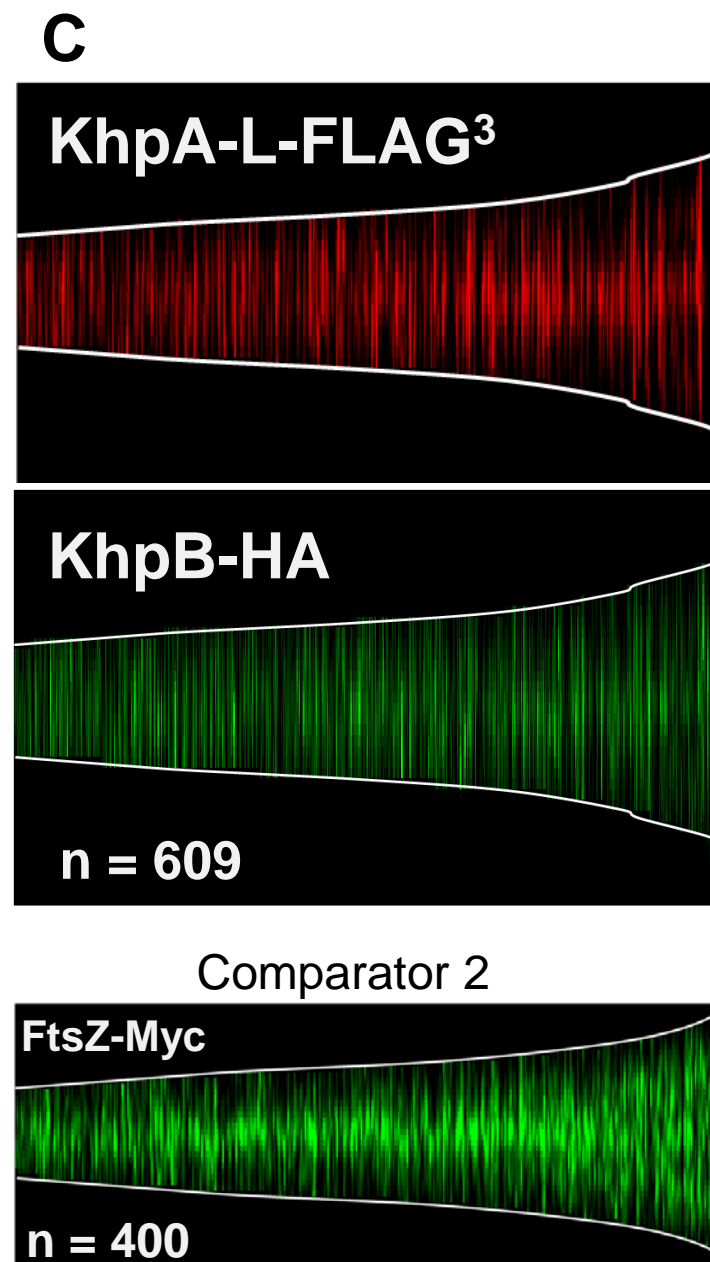

Fig. S8



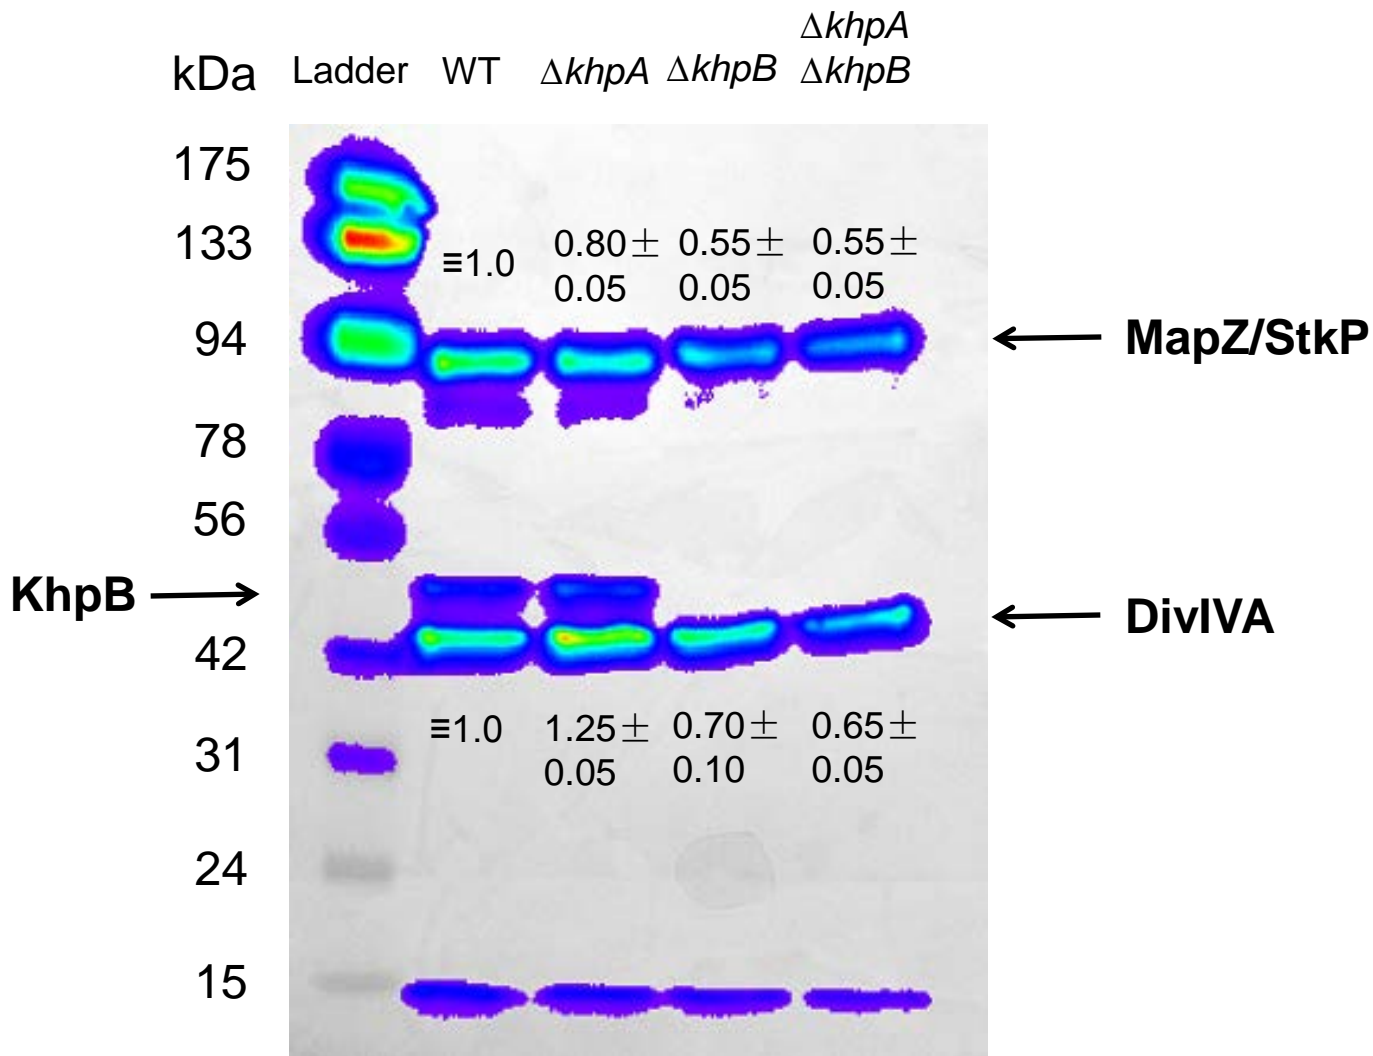

Fig. S9

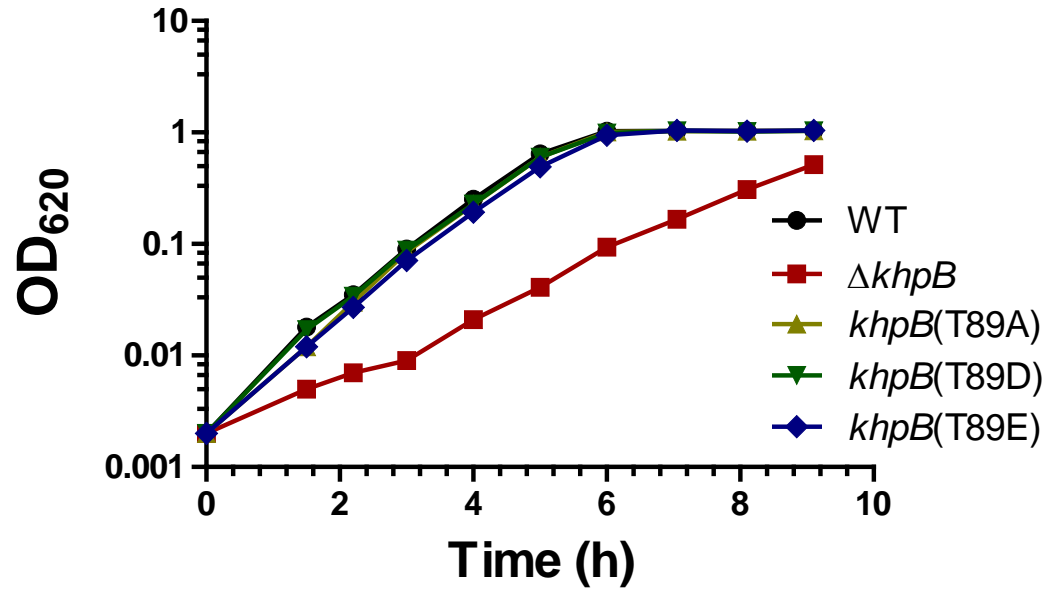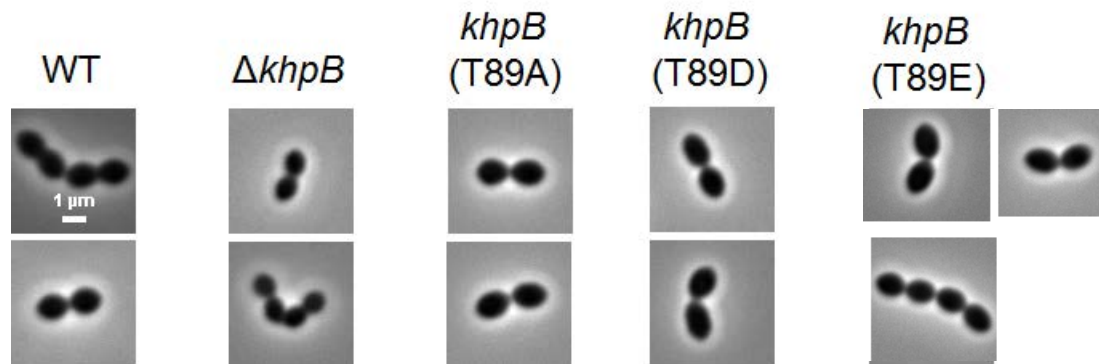

Fig. S10

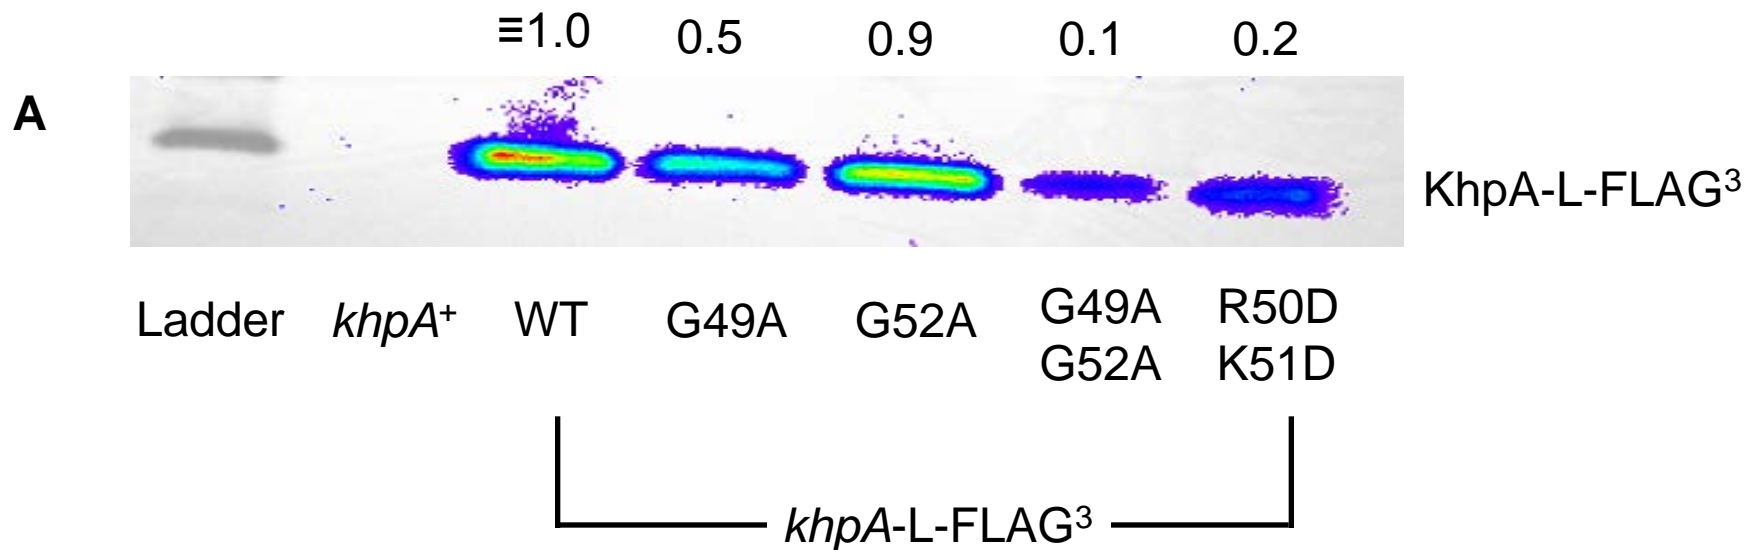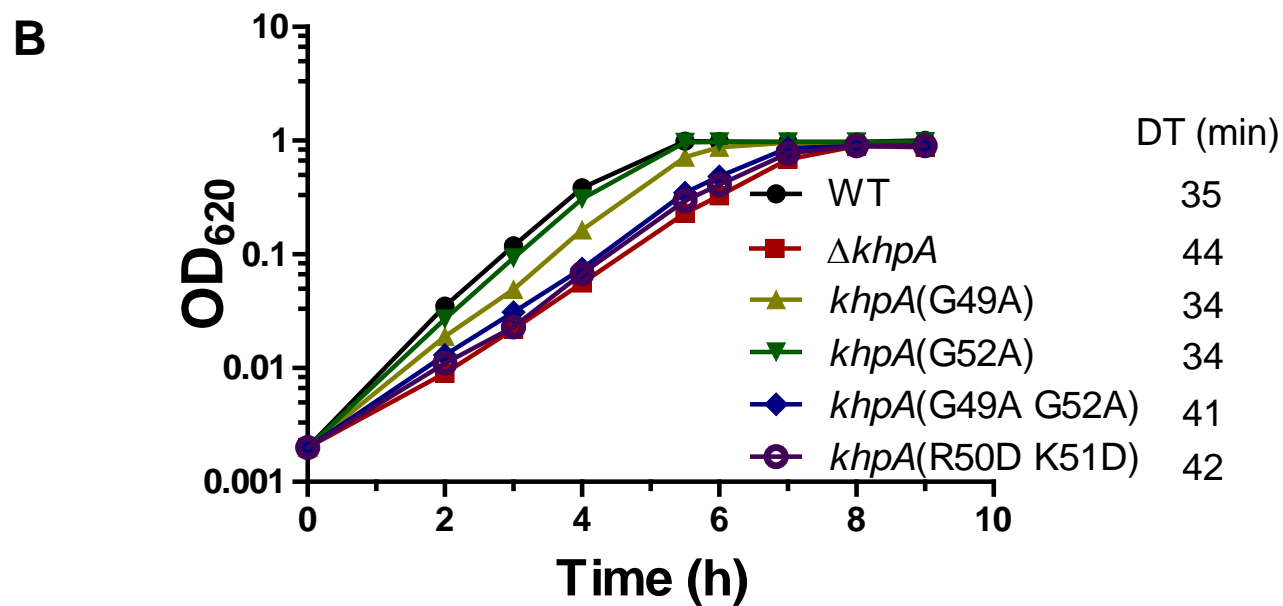

Fig. S11

Relative transcript amount

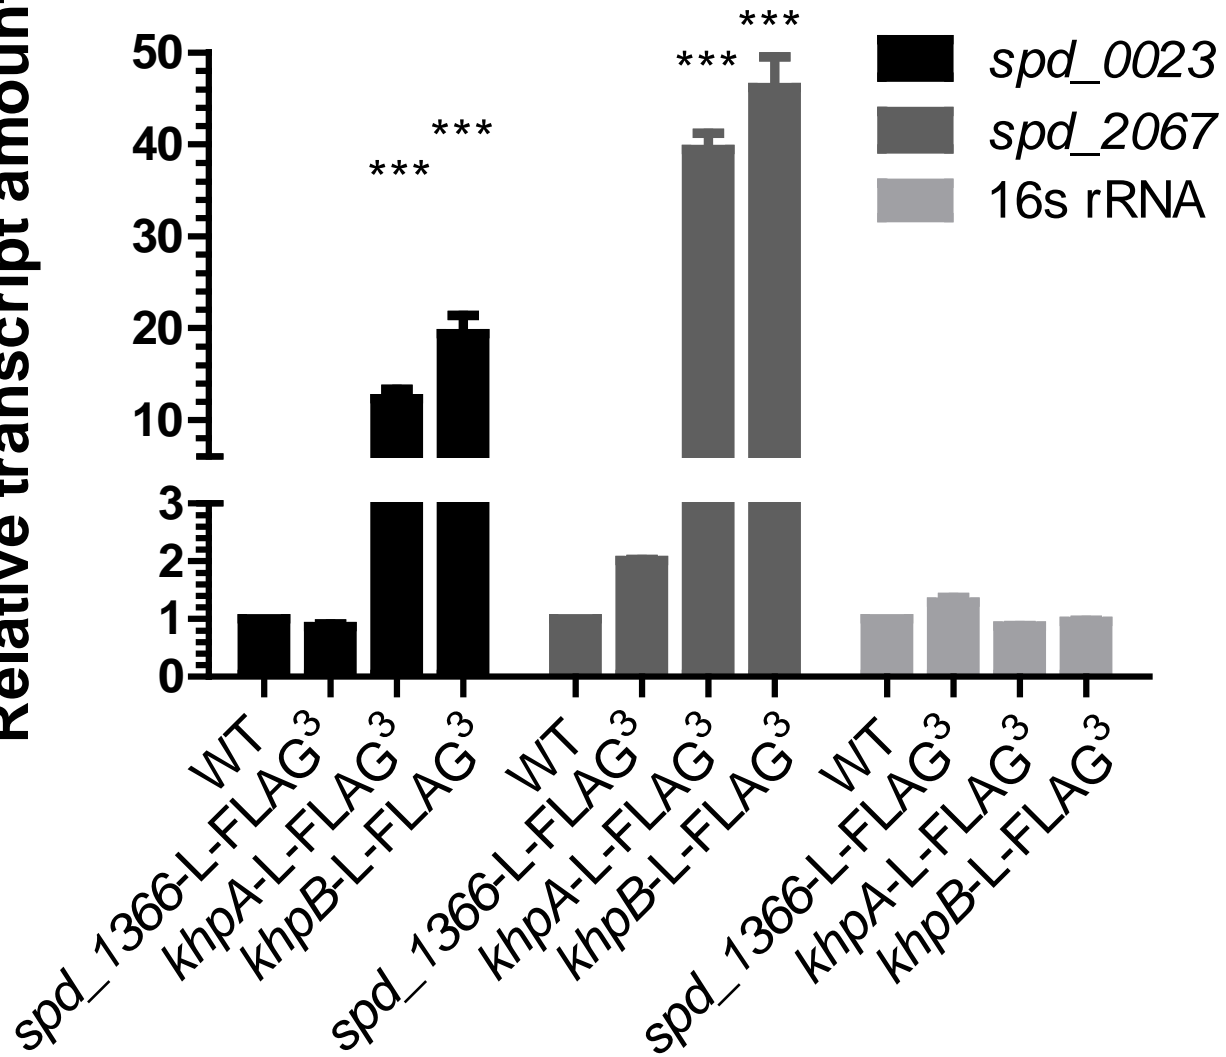

Fig. S12

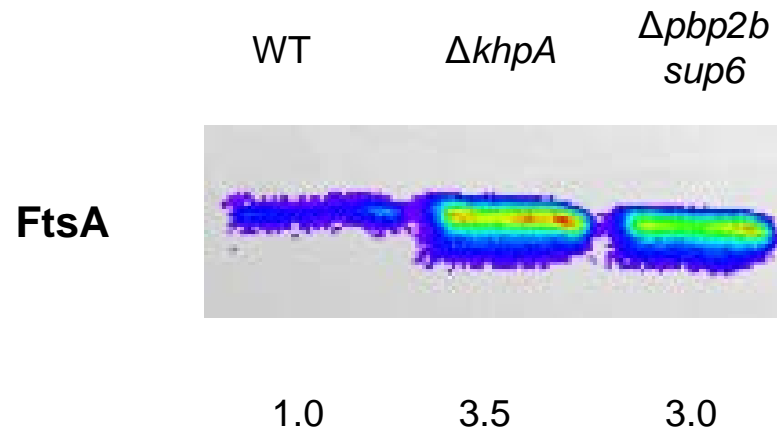

Fig. S13

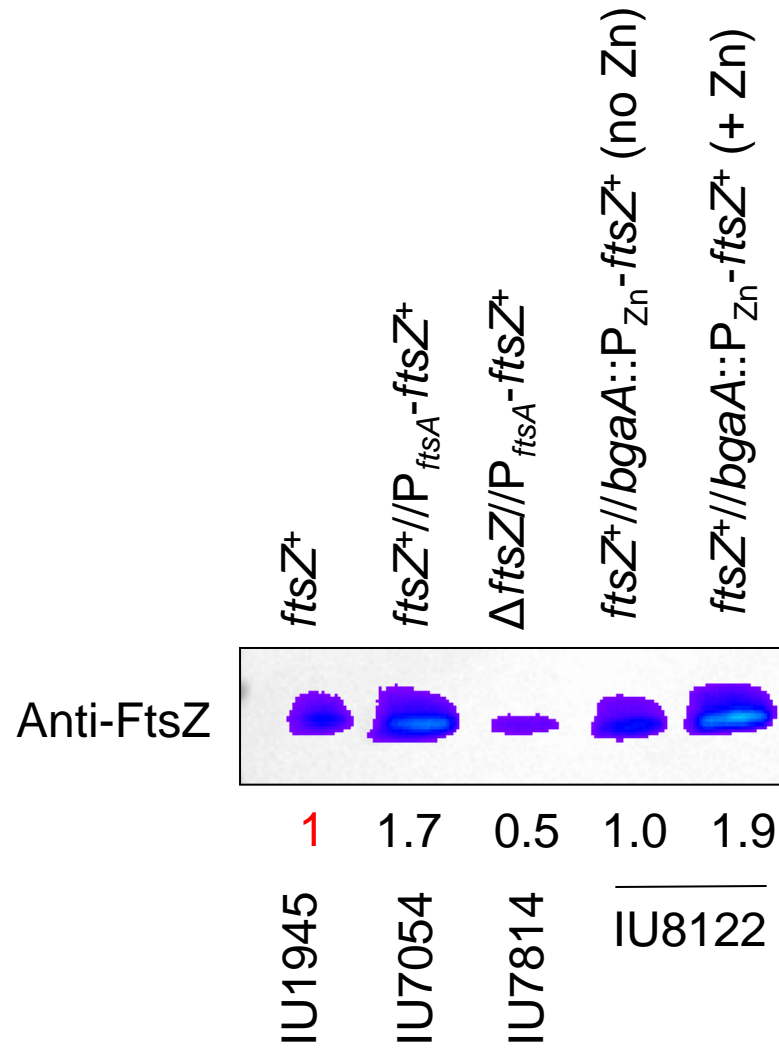

Fig. S14

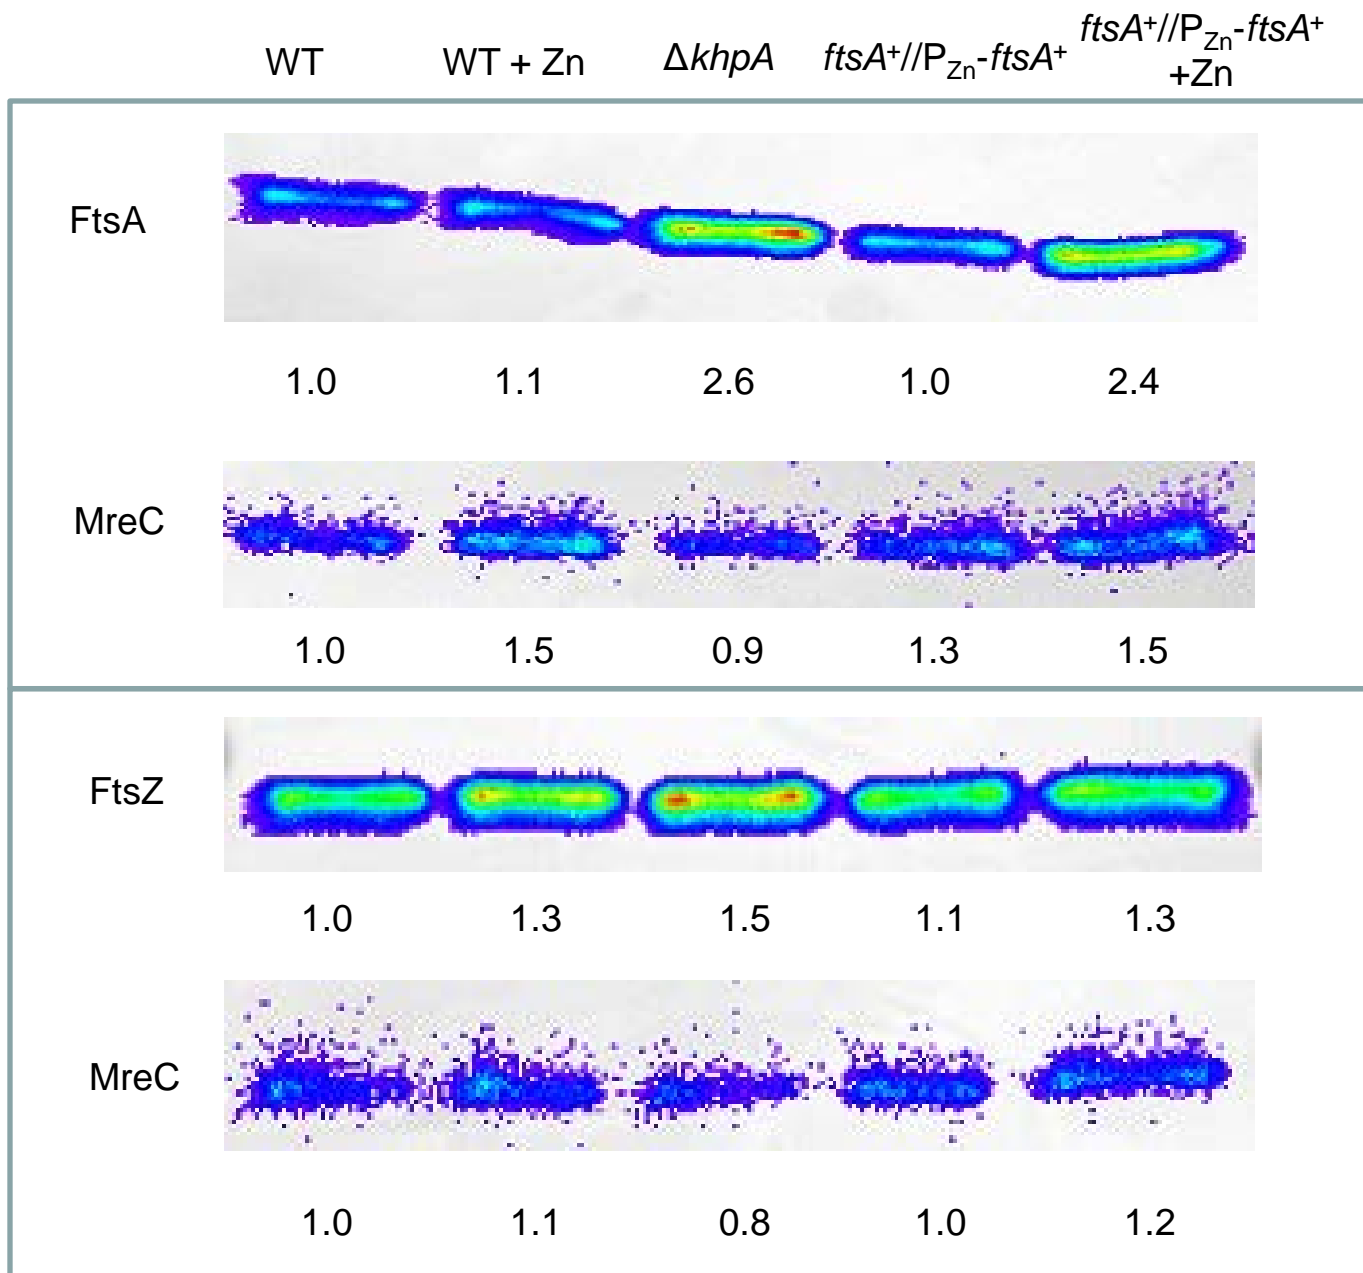

Fig. S15

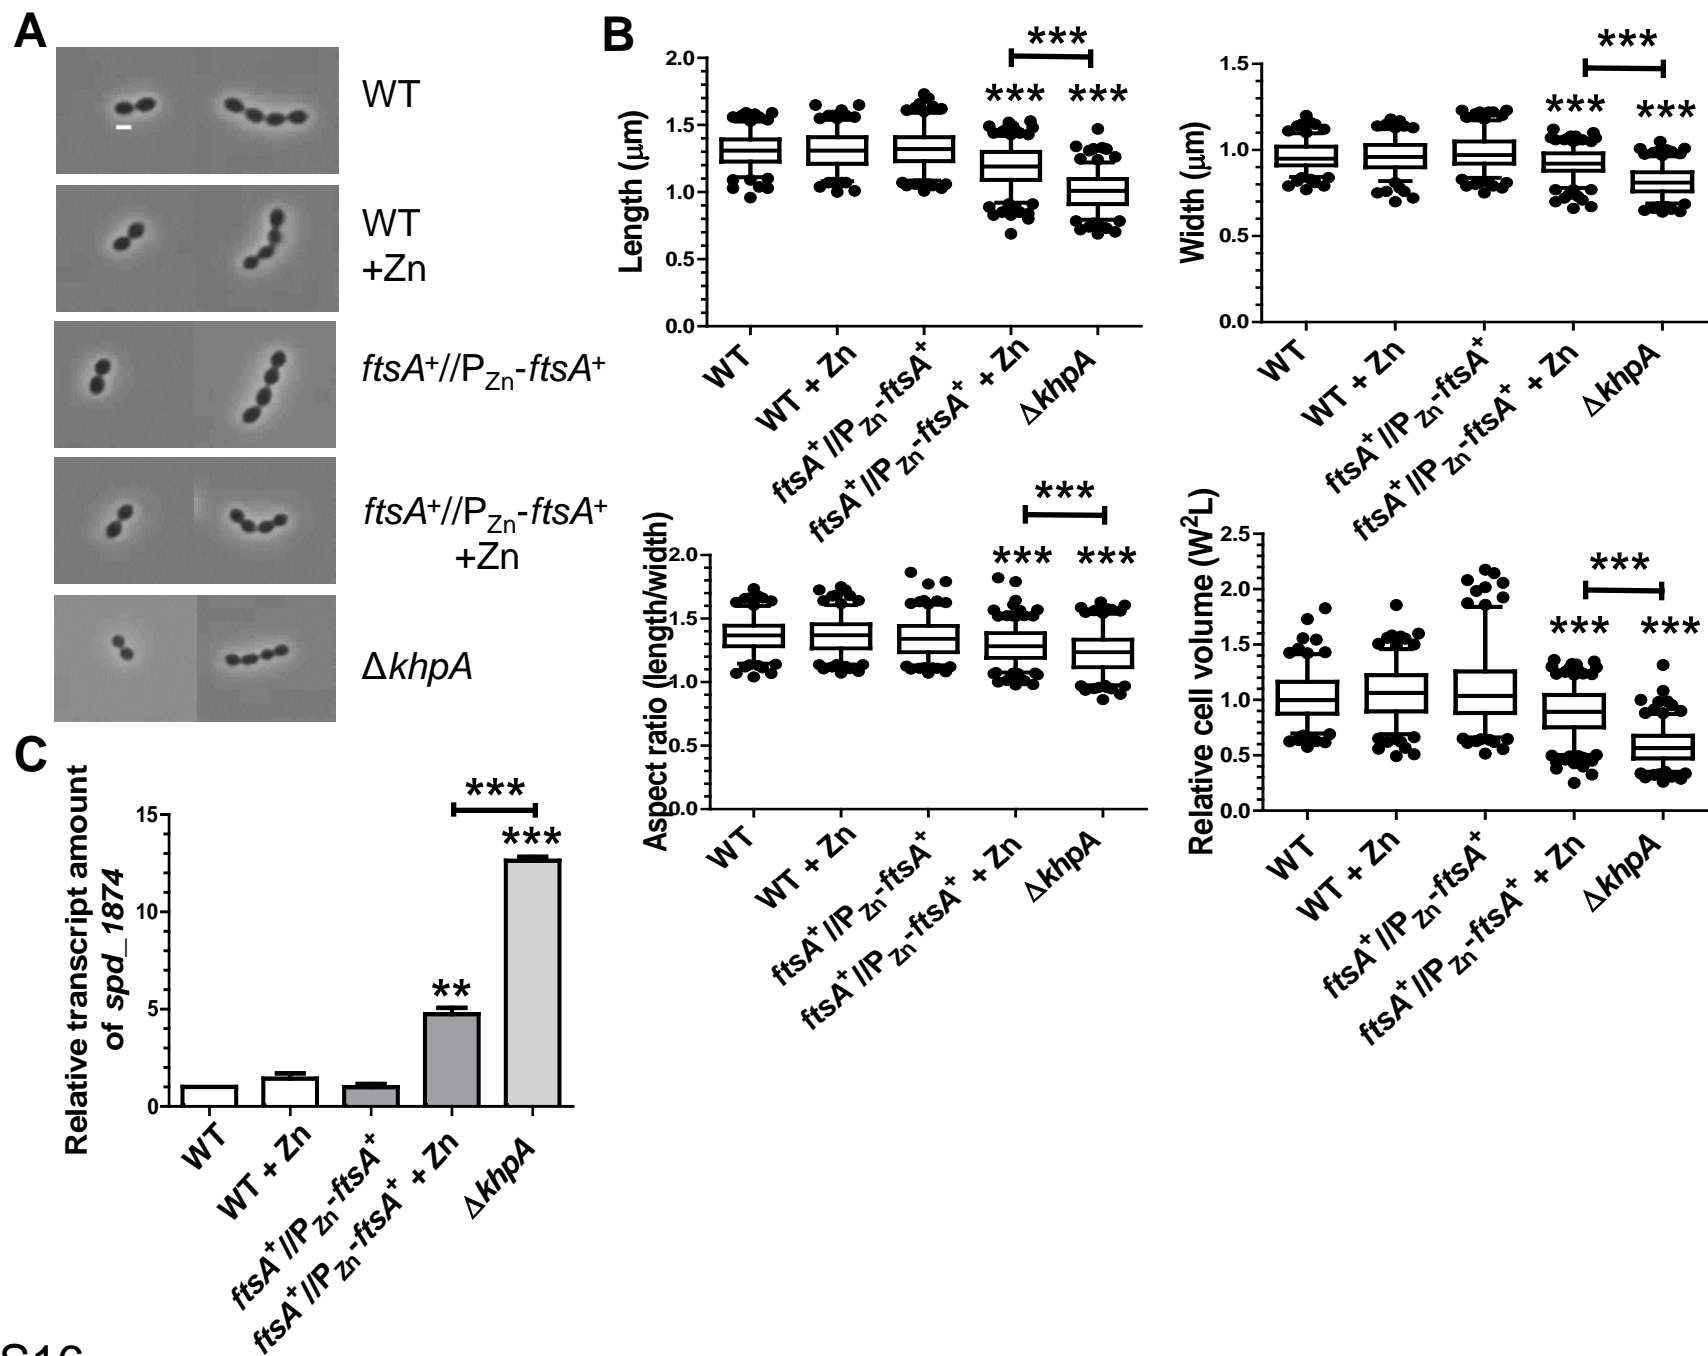

Fig. S16



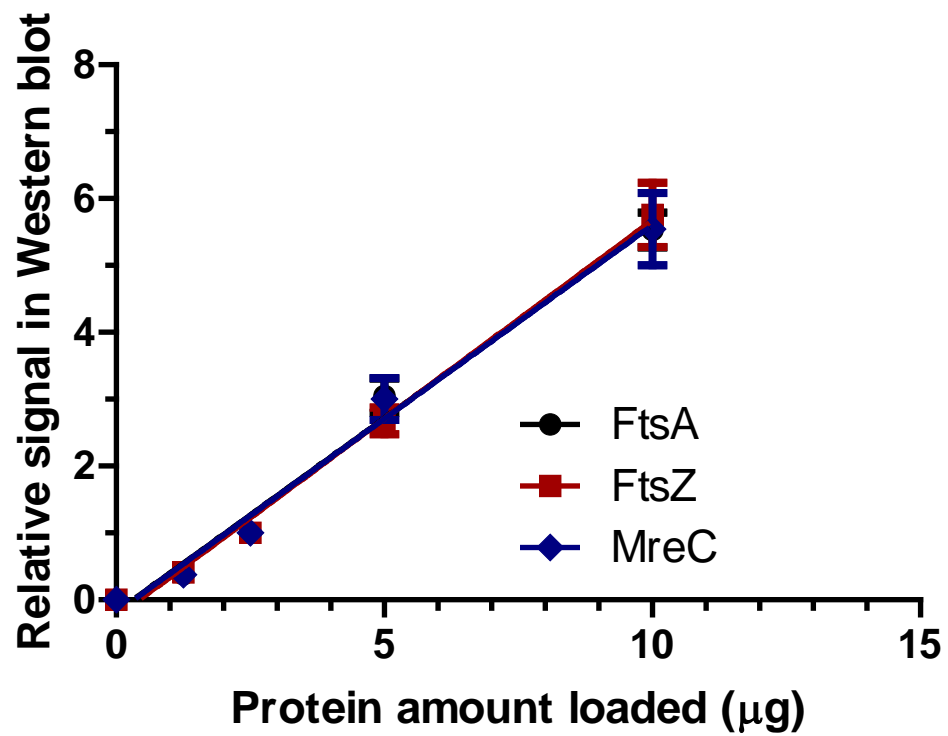

Fig. S17

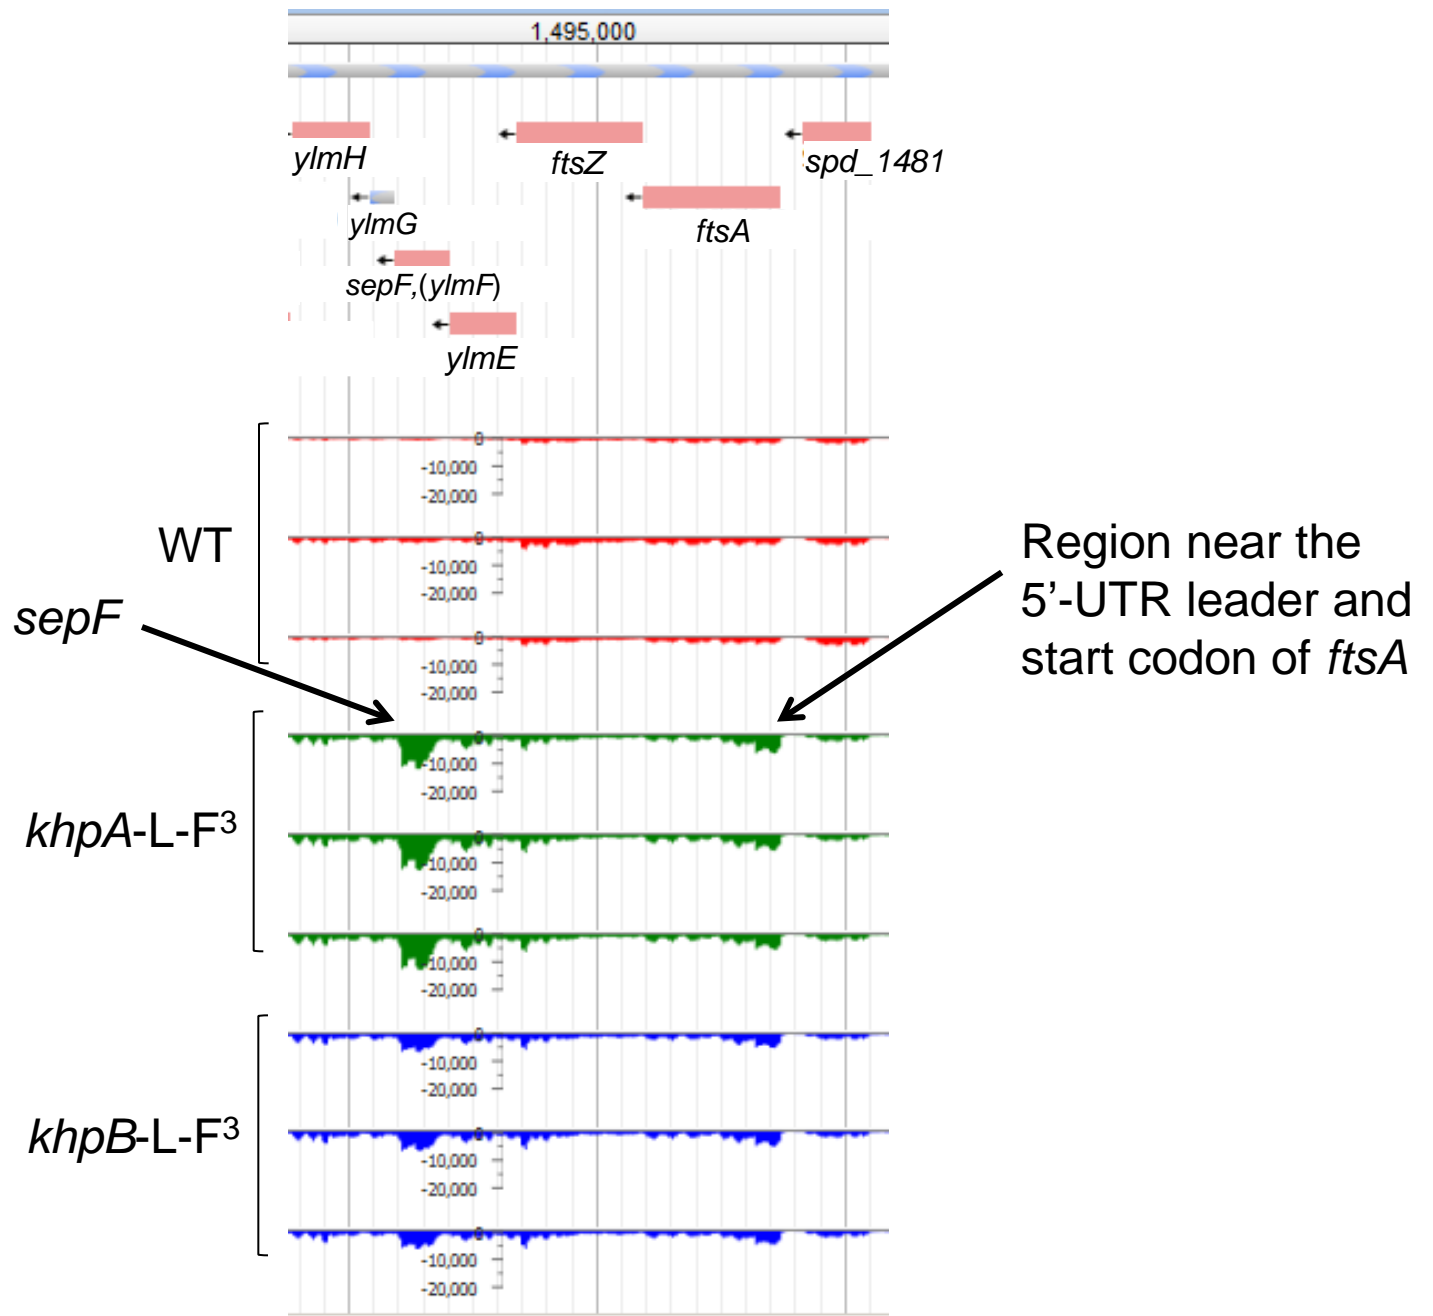

Fig. S18

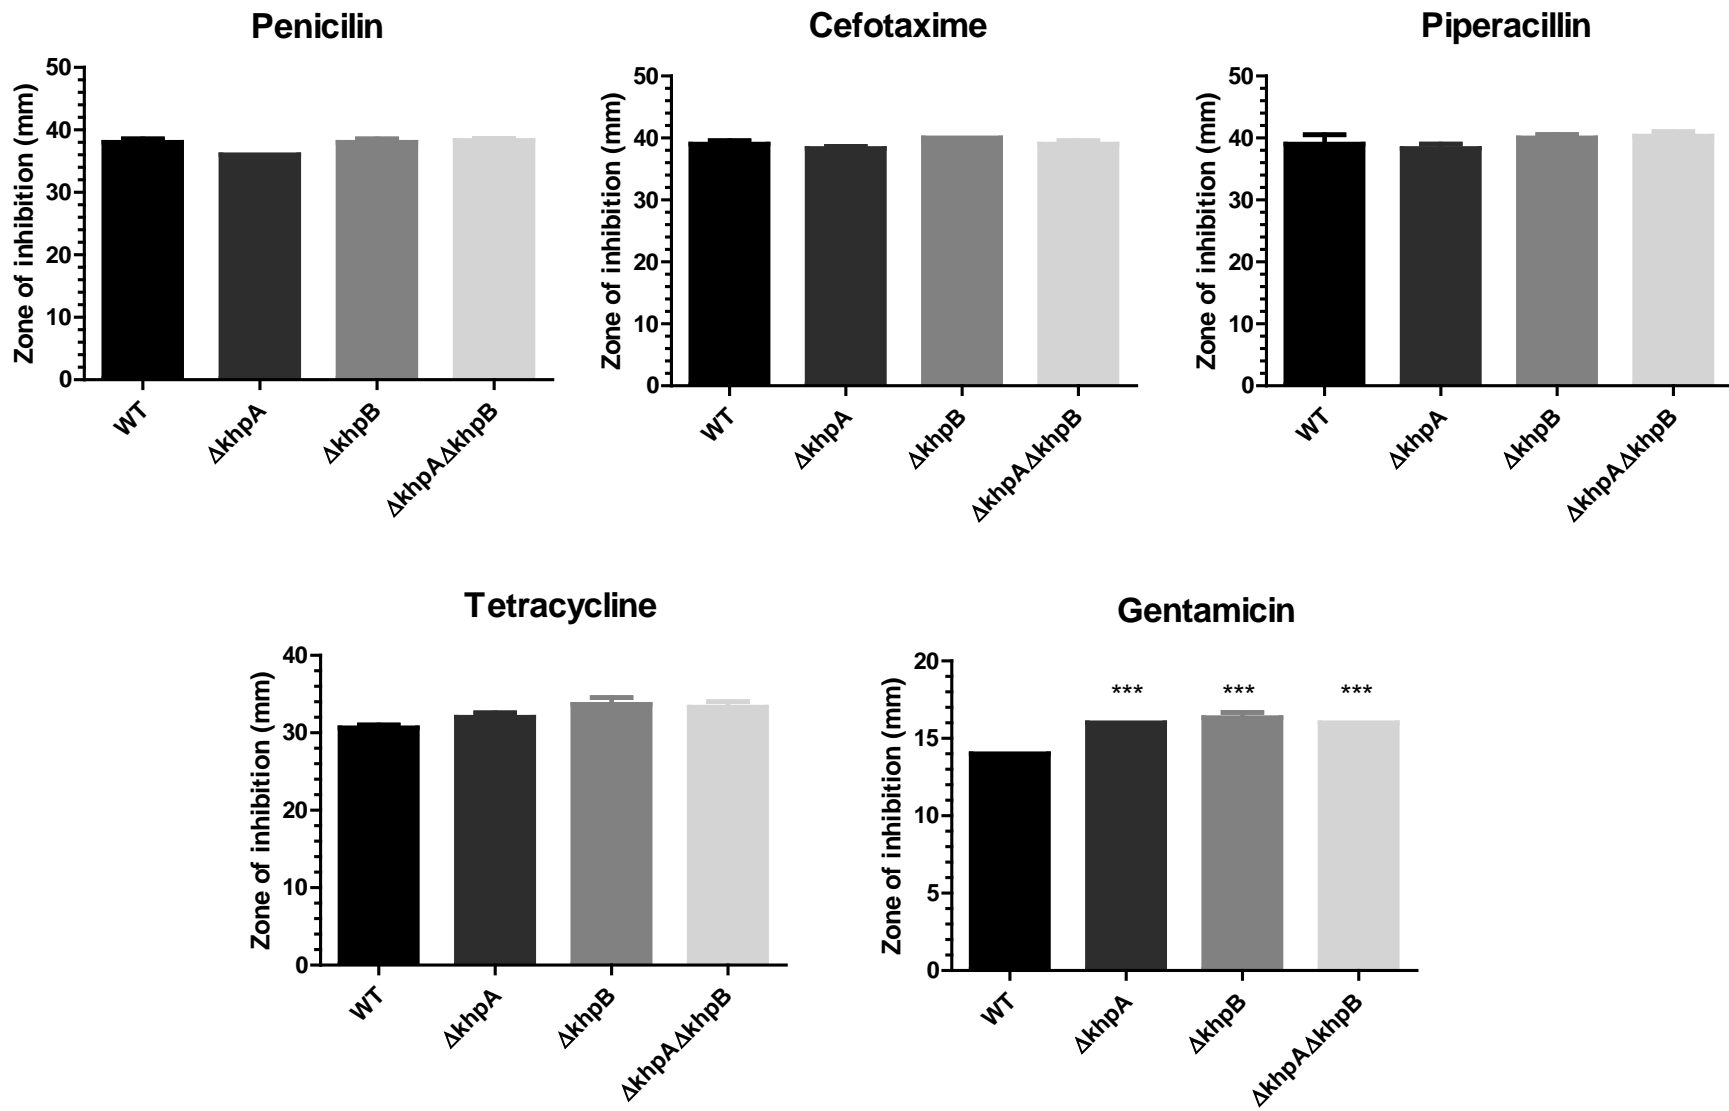

Fig. S19

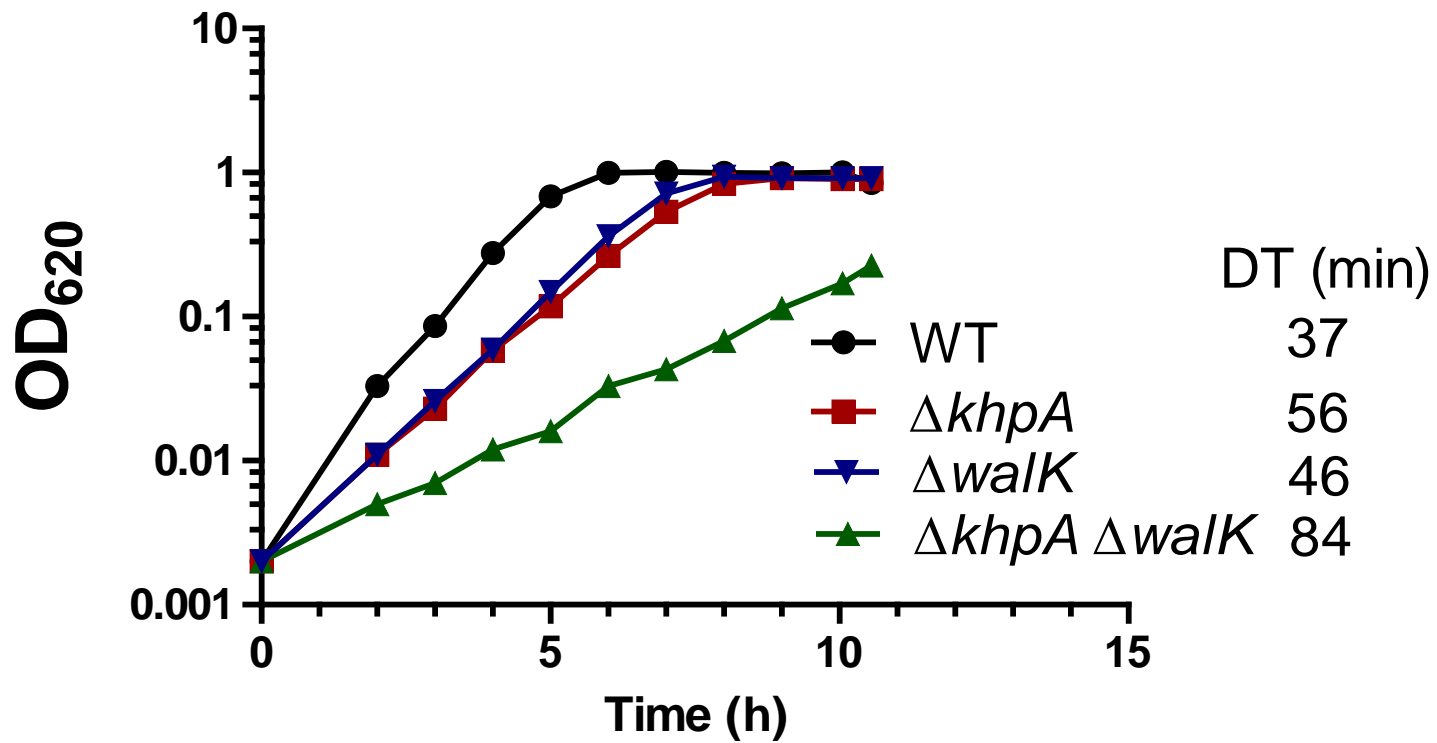

Fig. S20

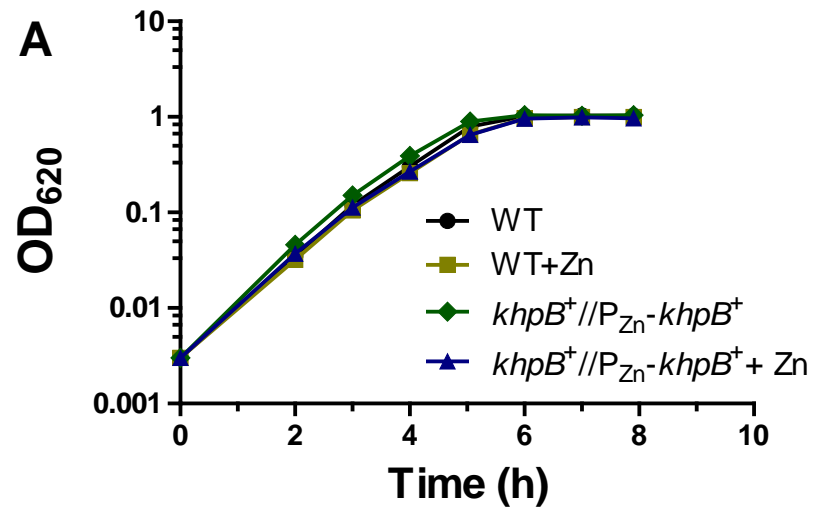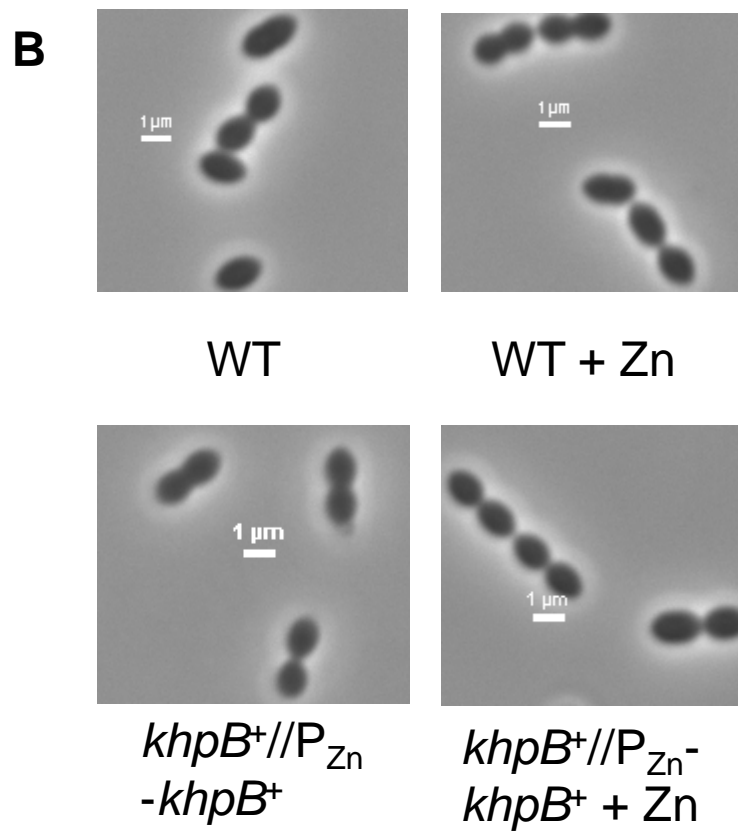

Fig. S21

**Table S4.** RNAs pulled down by KhpA or KhpB in RIP-Seq experiments<sup>a</sup>Table S4A. mRNAs and tRNAs pulled down by KhpA or KhpB<sup>b,c,d</sup>

| Gene                                                   | <i>khpA</i> -L-F <sup>3</sup> to WT |           | <i>khpB</i> -L-F <sup>3</sup> to WT |          | Description                               |
|--------------------------------------------------------|-------------------------------------|-----------|-------------------------------------|----------|-------------------------------------------|
|                                                        | log2Fold Ratio                      | P-adjust  | log2Fold Ratio                      | P-adjust |                                           |
| <i>spd_0009</i>                                        | 2.20                                | 1.58E-30  | 1.93                                | 1.63E-23 | hypothetical protein                      |
| <i>spd_0023</i>                                        | 4.38                                | 2.91E-32  | 3.96                                | 1.95E-26 | hypothetical protein (80 aa)              |
| <i>RS00670</i> ( <i>spd_0124</i> and <i>spd_0125</i> ) | 2.45                                | 2.09E-14  | 2.49                                | 7.01E-15 | hypothetical protein (65 aa)              |
| <i>spd_0138</i>                                        | 2.11                                | 1.78E-21  | 1.37                                | 1.32E-09 | glycosyl transferase                      |
| <i>spd_0139</i>                                        | 2.26                                | 5.17E-20  | 1.40                                | 3.14E-08 | glycosyl transferase family 2             |
| <i>spd_0174</i>                                        | 2.05                                | 7.87E-46  | 1.78                                | 1.89E-34 | DUF-1129 domain protein                   |
| <i>spd_0220</i>                                        | 1.83                                | 2.85E-25  | 2.07                                | 7.66E-32 | ACT superfamily protein (88 aa)           |
| <i>spd_0324</i> ( <i>cps2I</i> )                       | 2.11                                | 7.83E-28  | 1.98                                | 2.18E-24 | glycosyl transferase family 1             |
| <i>spd_0325</i>                                        | 2.49                                | 5.16E-14  | 2.06                                | 8.62E-10 | MATE_like protein                         |
| <i>spd_408</i>                                         | 2.13                                | 1.43E-30  | 2.48                                | 5.82E-41 | hypothetical protein                      |
| <i>RS02245</i> ( <i>spd_0422</i> and <i>spd_0423</i> ) | 2.16                                | 9.76E-05  | 1.41                                | 1.45E-02 | hypothetical protein                      |
| <i>spd_0449</i>                                        | 1.96                                | 2.24E-17  | 1.85                                | 1.91E-15 | hypothetical protein (45 aa)              |
| <i>spd_0452</i>                                        | 0.53                                | 1.41E-01  | 2.46                                | 2.19E-14 | integrase                                 |
| <i>spd_0594</i>                                        | 2.64                                | 5.43E-67  | 2.62                                | 9.36E-66 | DUF3165 domain membrane protein (84 aa)   |
| <i>spd_0603</i>                                        | 2.51                                | 2.56E-25  | 2.41                                | 3.20E-23 | S2P-M50 superfamily protein               |
| <i>spd_0604</i> ( <i>hemY</i> )                        | 2.40                                | 5.83E-32  | 2.30                                | 2.42E-29 | heme biosynthesis protein HemY            |
| <i>spd_0612</i>                                        | 2.21                                | 1.53E-10  | 1.74                                | 6.88E-07 | hypothetical protein                      |
| <i>spd_0613</i>                                        | 2.59                                | 4.42E-27  | 1.83                                | 7.99E-14 | hypothetical protein                      |
| <i>spd_0679</i> ( <i>trmD</i> )                        | 3.25                                | 5.45E-162 | 1.06                                | 8.40E-18 | tRNA (guanosine(37)-N1)-methyltransferase |
| <i>spd_0680</i>                                        | 2.69                                | 3.25E-100 | 0.83                                | 2.72E-10 | NRDD superfamily protein (92 aa)          |
| <i>spd_0688</i>                                        | 2.06                                | 1.43E-25  | 2.76                                | 4.63E-45 | PRK10535 superfamily membrane protein     |
| <i>spd_0703</i>                                        | 2.84                                | 1.41E-37  | 3.21                                | 8.89E-48 | WalRK regulon membrane protein (85 aa)    |
| <i>spd_0754</i>                                        | 2.28                                | 2.84E-33  | 2.39                                | 3.28E-36 | DUF-2969 domain protein (76 aa)           |
| <i>spd_0785</i>                                        | 2.26                                | 2.32E-50  | 2.40                                | 1.44E-56 | hypothetical protein (66 aa)              |
| <i>RS04590</i> ( <i>spd_0860</i> and <i>spd_0861</i> ) | 2.40                                | 2.41E-24  | 2.14                                | 1.82E-19 | 50S ribosomal protein L33                 |
| <i>spd_0897</i>                                        | 1.96                                | 4.35E-12  | 1.31                                | 7.82E-06 | sugar translocase                         |
| <i>RS04875</i> ( <i>spd_0914</i> and <i>spd_0915</i> ) | 2.30                                | 6.02E-25  | 2.22                                | 3.04E-23 | hypothetical protein (87 aa)              |
| <i>RS04880</i> ( <i>spd_0914</i> and <i>spd_0915</i> ) | 2.37                                | 7.38E-39  | 2.52                                | 1.21E-43 | transcriptional regulator (72 aa)         |
| <i>RS04905</i> ( <i>spd_0918</i> and <i>spd_0919</i> ) | 2.59                                | 1.44E-25  | 2.15                                | 7.30E-18 | methylase_S protein                       |
| <i>spd_0919</i>                                        | 2.38                                | 2.41E-24  | 2.12                                | 2.14E-19 | DUF-4286 protein (51 aa)                  |

|                                        |      |           |      |           |                                               |
|----------------------------------------|------|-----------|------|-----------|-----------------------------------------------|
| <i>spd_0932</i>                        | 2.99 | 1.51E-41  | 2.46 | 2.71E-28  | PHP superfamily protein                       |
| <i>spd_0933</i>                        | 2.54 | 3.39E-40  | 2.52 | 1.32E-39  | ABC_ATPase protein                            |
| <i>spd_0946</i>                        | 2.62 | 1.58E-10  | 2.43 | 4.01E-09  | Class II_aaRS-like-core superfamily           |
| <i>spd_0947</i>                        | 2.03 | 7.57E-10  | 1.90 | 1.12E-08  | hypothetical protein                          |
| <i>spd_0963</i>                        | 3.66 | 6.42E-78  | 4.18 | 2.36E-101 | DUF4044 domain membrane protein (44 aa)       |
| <i>spd_1003</i>                        | 2.99 | 1.16E-39  | 2.87 | 1.33E-36  | hypothetical protein (67 aa)                  |
| <i>RS05675 (spd_1069 and spd_1070)</i> | 2.40 | 4.31E-28  | 1.85 | 6.02E-17  | hypothetical protein                          |
| <i>spd_1071</i>                        | 2.56 | 4.18E-41  | 2.36 | 6.57E-35  | SIR2 domain protein                           |
| <i>spd_1159</i>                        | 3.69 | 4.48E-39  | 3.43 | 9.00E-34  | hypothetical protein (56 aa)                  |
| <i>spd_1164 (cdd2)</i>                 | 2.00 | 3.30E-12  | 1.35 | 5.35E-06  | cytidine deaminase                            |
| <i>spd_1165</i>                        | 3.24 | 4.77E-33  | 3.07 | 8.17E-30  | phosphatidylglycerophosphatase A              |
| <i>spd_1177</i>                        | 2.31 | 3.85E-12  | 2.11 | 2.76E-10  | multidrug ABC transporter ATP-binding protein |
| <i>RS06640 (spd_1258 and spd_1259)</i> | 2.97 | 5.58E-52  | 2.95 | 5.32E-51  | restriction endonuclease (60 aa)              |
| <i>spd_1260</i>                        | 2.16 | 1.36E-28  | 2.06 | 5.99E-26  | site-specific DNA-methyltransferase           |
| <i>spd_1265</i>                        | 2.08 | 3.38E-09  | 1.65 | 4.29E-06  | trep-strep superfamily membrane protein       |
| <i>spd_1315</i>                        | 2.31 | 3.75E-06  | 1.82 | 3.61E-04  | pseudogene transposase                        |
| <i>spd_1317</i>                        | 2.21 | 1.70E-19  | 2.01 | 4.46E-16  | hypothetical protein (46 aa)                  |
| <i>RS07625 (spd_1447 and spd_1448)</i> | 2.44 | 9.49E-24  | 2.39 | 1.17E-22  | hypothetical protein (100 aa)                 |
| <i>RS07695 (spd_1458 and spd_1459)</i> | 2.10 | 9.43E-23  | 2.12 | 3.89E-23  | hypothetical protein                          |
| <i>spd_1477 (sepF)</i>                 | 2.52 | 2.94E-48  | 1.74 | 2.20E-23  | cell division protein SepF                    |
| <i>spd_1587</i>                        | 2.17 | 6.23E-35  | 2.03 | 1.03E-30  | aspartate aminotransferase                    |
| <i>RS08415 (spd_1591 and spd_1592)</i> | 1.73 | 4.83E-15  | 1.98 | 1.98E-19  | transposase                                   |
| <i>spd_1614</i>                        | 2.56 | 5.75E-10  | 2.01 | 1.97E-06  | PhoU family transcriptional regulator         |
| <i>spd_1616</i>                        | 2.73 | 5.71E-14  | 2.75 | 4.17E-14  | hypothetical protein (98 aa)                  |
| <i>spd_1683 (tRNA-Ile)</i>             | 2.49 | 1.24E-34  | 2.63 | 1.60E-38  | tRNA-Ile                                      |
| <i>spd_1684 (tRNA-Gly)</i>             | 1.90 | 9.55E-18  | 2.09 | 2.53E-21  | tRNA-Gly                                      |
| <i>spd_1690 (tRNA-Pro)</i>             | 2.49 | 6.20E-21  | 2.31 | 4.51E-18  | tRNA-Pro                                      |
| <i>spd_1691 (tRNA-Arg)</i>             | 2.53 | 3.70E-26  | 2.35 | 1.13E-22  | tRNA-Arg, duplicate gene <i>spd_1805</i>      |
| <i>spd_1692 (tRNA-Leu)</i>             | 2.00 | 9.49E-23  | 1.92 | 4.54E-21  | tRNA-Leu, duplicate gene <i>spd_1806</i>      |
| <i>spd_1693 (tRNA-Gly)</i>             | 2.63 | 9.33E-27  | 2.45 | 3.20E-23  | tRNA-Gly, duplicate gene <i>spd_1807</i>      |
| <i>spd_1694 (tRNA-Thr)</i>             | 4.22 | 1.86E-127 | 4.00 | 2.78E-114 | tRNA-Thr, duplicate gene <i>spd_1808</i>      |
| <i>spd_1749</i>                        | 1.95 | 6.13E-15  | 1.77 | 2.79E-12  | bacteriocin formation protein                 |
| <i>spd_1756</i>                        | 2.12 | 1.01E-08  | 1.62 | 2.15E-05  | hypothetical protein (63 aa)                  |
| <i>RS09330 (spd_1764 and spd_1765)</i> | 2.59 | 2.06E-28  | 2.45 | 2.89E-25  | DUF1146 superfamily protein                   |
| <i>spd_1783</i>                        | 1.97 | 1.33E-29  | 1.78 | 4.64E-24  | hypothetical protein                          |
| <i>spd_1803</i>                        | 2.07 | 1.07E-35  | 1.60 | 1.28E-21  | hypothetical protein (68 aa)                  |
| <i>spd_1804</i>                        | 3.96 | 4.67E-51  | 4.18 | 1.44E-56  | tRNA-Pro                                      |
| <i>spd_1805</i>                        | 2.53 | 3.70E-26  | 2.35 | 1.13E-22  | tRNA-Arg, duplicate gene <i>spd_1691</i>      |

|                            |      |           |      |           |                                                       |
|----------------------------|------|-----------|------|-----------|-------------------------------------------------------|
| <i>spd_1806</i>            | 2.00 | 9.49E-23  | 1.92 | 4.54E-21  | tRNA-Leu, duplicate gene <i>spd_1692</i>              |
| <i>spd_1807</i>            | 2.63 | 9.33E-27  | 2.45 | 3.20E-23  | tRNA-Gly, duplicate gene <i>spd_1693</i>              |
| <i>spd_1808</i>            | 4.22 | 1.86E-127 | 4.00 | 2.78E-114 | tRNA-Thr, duplicate gene <i>spd_1694</i>              |
| <i>spd_1828</i>            | 2.36 | 1.11E-28  | 2.30 | 3.34E-27  | ABC transporter ATP-binding protein                   |
| <i>spd_1842 (araD)</i>     | 0.21 | 5.33E-01  | 2.01 | 2.92E-14  | L-ribulose-5-phosphate 4-epimerase                    |
| <i>spd_1844 (ulaD)</i>     | 0.93 | 6.25E-02  | 2.37 | 1.61E-07  | 3-keto-L-gulonate-6-phosphate decarboxylase           |
| <i>spd_1845</i>            | 0.05 | 9.46E-01  | 2.27 | 3.04E-05  | PTS ascorbate transporter subunit IIA                 |
| <i>spd_1846</i>            | 0.18 | 7.49E-01  | 2.36 | 1.49E-08  | PTS ascorbate transporter subunit IIB                 |
| <i>spd_1847</i>            | 0.00 | 9.99E-01  | 2.43 | 5.98E-11  | PTS ascorbate transporter subunit IIC                 |
| <i>spd_1848</i>            | 0.57 | 4.37E-04  | 4.25 | 4.01E-174 | hypothetical protein                                  |
| <i>spd_1864</i>            | 2.25 | 4.19E-23  | 2.80 | 3.96E-35  | DUF-1033 superfamily protein                          |
| <i>spd_1871</i>            | 1.92 | 1.62E-12  | 2.04 | 7.10E-14  | hypothetical protein (99 aa)                          |
| <i>spd_1879 (tRNA-Leu)</i> | 2.16 | 1.42E-23  | 2.33 | 2.36E-27  | tRNA-Leu                                              |
| <i>spd_1880 (tRNA-Gln)</i> | 1.86 | 1.92E-19  | 2.09 | 3.27E-24  | tRNA-Gln                                              |
| <i>spd_1995 (fucK)</i>     | 1.21 | 1.23E-05  | 2.26 | 3.49E-17  | L-fuculose kinase                                     |
| <i>spd_2006 (dltX)</i>     | 2.05 | 2.20E-09  | 2.40 | 1.91E-12  | D-ala-teichoic acid biosynthesis protein DltX (43 aa) |
| <i>spd_2066 (tRNA-Arg)</i> | 2.42 | 1.92E-24  | 2.65 | 7.45E-29  | tRNA-Arg                                              |
| <i>spd_2067 (rimH)</i>     | 2.73 | 9.77E-31  | 2.94 | 1.39E-35  | rRNA large subunit methyltransferase                  |



**Table S4B.** Intergenic RNAs and sRNAs pulled down by KhpA or KhpB<sup>c,d,e</sup>

| D39 genome locus (bp) |        | <i>khpA</i> -L-F <sup>3</sup> to WT |           | <i>khpB</i> -L-F <sup>3</sup> to WT |           | Nearest gene    | Distance to nearest gene | Nearest gene description                  |
|-----------------------|--------|-------------------------------------|-----------|-------------------------------------|-----------|-----------------|--------------------------|-------------------------------------------|
| Start                 | End    | log2Fold Ratio                      | P-adjust  | log2Fold Ratio                      | P-adjust  |                 |                          |                                           |
| 14901                 | 15000  | 3.62                                | 1.29E-38  | 3.51                                | 4.43E-36  | <i>spd_0015</i> | 3                        | tRNA-Glu                                  |
| 15001                 | 15100  | 3.68                                | 9.62E-127 | 3.73                                | 1.10E-129 | <i>spd_0016</i> | 50                       | 16S ribosomal RNA                         |
| 39901                 | 40000  | 2.58                                | 4.44E-08  | 2.33                                | 1.21E-06  | <i>spd_0047</i> | 29                       | hypothetical protein                      |
| 40101                 | 40200  | 2.45                                | 6.39E-12  | 2.21                                | 1.08E-09  | <i>spd_0048</i> | 24                       | ISL3 family transposase                   |
| 74401                 | 74500  | 1.57                                | 9.97E-03  | 2.17                                | 2.17E-04  | <i>spd_0073</i> | 53                       | chlorohydrolase                           |
| 119101                | 119200 | 2.06                                | 1.10E-03  | 2.63                                | 1.89E-05  | <i>spd_0116</i> | 170                      | hypothetical protein                      |
| 120501                | 120600 | 1.86                                | 1.88E-02  | 2.63                                | 5.20E-04  | <i>spd_0118</i> | 222                      | hypothetical protein                      |
| 120601                | 120700 | 1.97                                | 1.80E-03  | 1.88                                | 3.41E-03  | <i>spd_0118</i> | 322                      | hypothetical protein                      |
| 120901                | 121000 | 2.10                                | 3.97E-05  | 2.16                                | 2.50E-05  | <i>spd_0119</i> | 84                       | hypothetical protein                      |
| 126801                | 126900 | 2.62                                | 2.86E-05  | 2.59                                | 4.05E-05  | <i>spd_0125</i> | 7                        | hypothetical protein                      |
| 142501                | 142600 | 2.15                                | 3.12E-03  | 1.44                                | 6.93E-02  | <i>spd_0138</i> | 4                        | glycosyl transferase                      |
| 146401                | 146500 | 2.63                                | 1.51E-05  | 1.98                                | 2.00E-03  | <i>spd_0140</i> | 20                       | ABC transporter ATP-binding protein       |
| 146601                | 146700 | 2.51                                | 1.47E-03  | 1.00                                | 2.83E-01  | <i>spd_0141</i> | 30                       | hypothetical protein                      |
| 170101                | 170200 | 2.82                                | 1.34E-14  | 2.98                                | 3.58E-16  | <i>spd_0165</i> | 80                       | DNA mismatch repair protein HexB          |
| 170201                | 170300 | 1.90                                | 6.33E-14  | 2.23                                | 7.31E-19  | <i>spd_0166</i> | 46                       | 6,7-dimethyl-8-ribityllumazine synthase   |
| 173801                | 173900 | 3.62                                | 1.49E-22  | 3.34                                | 4.34E-19  | <i>spd_0169</i> | 42                       | bifunctional reductase                    |
| 173901                | 174000 | 3.52                                | 1.71E-21  | 3.80                                | 7.64E-25  | <i>spd_0169</i> | 142                      | bifunctional reductase                    |
| 233701                | 233800 | 1.99                                | 2.58E-08  | 1.32                                | 5.11E-04  | <i>spd_0242</i> | 21                       | hypothetical protein                      |
| 233801                | 233900 | 2.57                                | 3.51E-15  | 2.37                                | 6.47E-13  | <i>spd_0243</i> | 11                       | isoprenyl transferase                     |
| 257901                | 258000 | 2.14                                | 1.32E-37  | 2.09                                | 7.97E-36  | <i>spd_0260</i> | 91                       | 16S rRNA pseudouridine(516) synthase      |
| 284301                | 284400 | 2.83                                | 9.77E-09  | 2.78                                | 2.29E-08  | <i>spd_0285</i> | 36                       | alpha-xylosidase                          |
| 394501                | 394600 | 2.58                                | 5.84E-22  | 1.85                                | 1.76E-11  | <i>spd_0391</i> | 315                      | hypothetical protein                      |
| 394701                | 394800 | 2.59                                | 9.12E-14  | 1.82                                | 4.71E-07  | <i>spd_0393</i> | 153                      | N utilization substance protein B homolog |
| 423201                | 423300 | 2.38                                | 1.22E-04  | 1.66                                | 1.22E-02  | <i>spd_0422</i> | 38                       | hypothetical protein                      |
| 423401                | 423500 | 2.09                                | 7.62E-08  | 2.08                                | 9.49E-08  | <i>spd_0423</i> | 55                       | hypothetical protein                      |
| 457801                | 457900 | 1.96                                | 2.17E-03  | 2.05                                | 1.38E-03  | <i>spd_0450</i> | 85                       | hypothetical protein                      |
| 503801                | 503900 | 3.08                                | 1.10E-22  | 3.01                                | 1.59E-21  | <i>spd_0496</i> | 8                        | cell division protein Fic                 |
| 534701                | 534800 | 2.56                                | 8.88E-04  | 2.25                                | 4.34E-03  | <i>spd_0524</i> | 60                       | DNA-binding response regulator            |
| 565601                | 565700 | 1.92                                | 1.91E-04  | 2.16                                | 2.41E-05  | <i>spd_0554</i> | 419                      | ABC transporter ATP-binding protein       |
| 576501                | 576600 | 1.95                                | 3.14E-03  | 2.38                                | 2.53E-04  | <i>spd_0558</i> | 119                      | serine protease                           |
| 576601                | 576700 | 2.03                                | 2.64E-04  | 2.74                                | 3.95E-07  | <i>spd_0558</i> | 219                      | serine protease                           |
| 626601                | 626700 | 2.24                                | 4.79E-07  | 2.16                                | 1.56E-06  | <i>spd_0600</i> | 85                       | cell division protein DivIB               |

|         |         |      |          |       |          |          |     |                                          |
|---------|---------|------|----------|-------|----------|----------|-----|------------------------------------------|
| 626901  | 627000  | 2.35 | 2.77E-22 | 2.46  | 2.74E-24 | spd_0603 | 307 | hypothetical protein                     |
| 627001  | 627100  | 2.81 | 1.75E-09 | 2.80  | 2.54E-09 | spd_0603 | 207 | hypothetical protein                     |
| 627101  | 627200  | 2.66 | 6.86E-11 | 2.53  | 7.65E-10 | spd_0603 | 107 | hypothetical protein                     |
| 642001  | 642100  | 2.08 | 1.05E-03 | 1.86  | 4.41E-03 | spd_0620 | 130 | lysine--tRNA ligase                      |
| 642101  | 642200  | 3.16 | 6.43E-06 | 2.46  | 7.49E-04 | spd_0620 | 230 | lysine--tRNA ligase                      |
| 646801  | 646900  | 1.79 | 2.33E-06 | 2.55  | 5.06E-12 | spd_0625 | 215 | cobalt ABC transporter permease          |
| 646901  | 647000  | 2.98 | 1.66E-09 | 2.85  | 1.04E-08 | spd_0625 | 115 | cobalt ABC transporter permease          |
| 647001  | 647100  | 2.17 | 7.11E-05 | 1.63  | 4.72E-03 | spd_0625 | 15  | cobalt ABC transporter permease          |
| 685001  | 685100  | 3.09 | 1.79E-05 | 0.27  | 7.98E-01 | spd_0664 | 161 | S-adenosylmethionine synthase            |
| 694601  | 694700  | 3.22 | 2.38E-13 | -0.33 | 6.32E-01 | spd_0675 | 57  | KhpA, RNA-binding protein                |
| 694701  | 694800  | 6.07 | 2.50E-39 | 0.21  | 7.96E-01 | spd_0675 | 157 | KhpA, RNA-binding protein                |
| 694801  | 694900  | 5.90 | 2.50E-50 | 0.46  | 4.38E-01 | spd_0676 | 221 | alpha/beta hydrolase                     |
| 694901  | 695000  | 5.74 | 3.16E-36 | 0.20  | 7.97E-01 | spd_0676 | 121 | alpha/beta hydrolase                     |
| 695001  | 695100  | 5.36 | 2.15E-18 | 0.49  | 5.99E-01 | spd_0676 | 21  | alpha/beta hydrolase                     |
| 727601  | 727700  | 2.43 | 2.78E-07 | 2.09  | 1.72E-05 | spd_0712 | 147 | transposase                              |
| 727701  | 727800  | 2.29 | 2.89E-05 | 1.84  | 1.25E-03 | spd_0712 | 47  | transposase                              |
| 737901  | 738000  | 1.98 | 5.81E-03 | 2.03  | 4.98E-03 | spd_0722 | 75  | ADP-dep(S)-NAD(P)H-hydrate dehydratase   |
| 738001  | 738100  | 2.43 | 1.41E-04 | 2.11  | 1.34E-03 | spd_0723 | 8   | ribose-5-phosphate isomerase             |
| 799901  | 800000  | 3.22 | 4.50E-32 | 3.06  | 9.25E-29 | spd_0784 | 69  | DEAD/DEAH box helicase                   |
| 800001  | 800100  | 2.98 | 1.30E-34 | 2.87  | 4.50E-32 | spd_0785 | 3   | hypothetical protein                     |
| 809601  | 809700  | 1.76 | 1.76E-02 | 2.18  | 2.67E-03 | spd_0791 | 78  | chlorohydrolase                          |
| 810801  | 810900  | 2.78 | 6.16E-06 | 2.44  | 1.02E-04 | spd_0792 | 186 | membrane protein                         |
| 810901  | 811000  | 2.04 | 1.06E-03 | 2.09  | 8.54E-04 | spd_0792 | 86  | membrane protein                         |
| 820301  | 820400  | 1.58 | 2.06E-03 | 2.38  | 9.06E-07 | spd_0803 | 124 | membrane protein                         |
| 926501  | 926600  | 2.29 | 1.12E-06 | 2.04  | 2.30E-05 | spd_0914 | 35  | hypothetical protein                     |
| 927401  | 927500  | 1.93 | 9.74E-10 | 2.17  | 4.59E-12 | spd_0915 | 24  | transcriptional regulator                |
| 927501  | 927600  | 2.38 | 4.38E-20 | 2.45  | 3.30E-21 | spd_0915 | 124 | transcriptional regulator                |
| 927601  | 927700  | 2.22 | 2.09E-03 | 2.35  | 1.15E-03 | spd_0915 | 70  | hypothetical protein                     |
| 931601  | 931700  | 2.36 | 7.98E-10 | 1.71  | 2.20E-05 | spd_0918 | 8   | iron ABC transporter ATP-binding protein |
| 931701  | 931800  | 2.31 | 3.57E-08 | 1.93  | 7.65E-06 | spd_0918 | 108 | iron ABC transporter ATP-binding protein |
| 931801  | 931900  | 2.95 | 2.58E-06 | 2.77  | 1.33E-05 | spd_0918 | 208 | iron ABC transporter ATP-binding protein |
| 932701  | 932800  | 4.44 | 6.68E-37 | 4.17  | 2.28E-32 | spd_0919 | 51  | hypothetical protein                     |
| 932801  | 932900  | 2.24 | 9.49E-04 | 2.44  | 2.95E-04 | spd_0919 | 151 | hypothetical protein                     |
| 933001  | 933100  | 2.21 | 2.99E-03 | 1.64  | 3.88E-02 | spd_0920 | 234 | hypothetical protein                     |
| 942201  | 942300  | 2.57 | 1.79E-11 | 2.15  | 4.57E-08 | spd_0930 | 114 | transcriptional regulator                |
| 962501  | 962600  | 1.20 | 1.34E-01 | 1.97  | 8.14E-03 | spd_0951 | 184 | transcriptional regulator                |
| 1006701 | 1006800 | 3.24 | 8.86E-26 | 3.02  | 3.44E-22 | spd_0998 | 99  | ABC transporter ATP-binding protein      |
| 1028001 | 1028100 | 2.16 | 9.14E-18 | 2.15  | 1.76E-17 | spd_1013 | 22  | IS630 family transposase                 |
| 1047201 | 1047300 | 2.89 | 1.04E-06 | 3.22  | 3.92E-08 | spd_1021 | 176 | ribonuclease HII                         |
| 1047301 | 1047400 | 2.22 | 4.22E-04 | 1.96  | 2.45E-03 | spd_1023 | 209 | tyrosine recombinase XerS                |
| 1047401 | 1047500 | 2.66 | 1.68E-05 | 2.47  | 9.00E-05 | spd_1023 | 109 | tyrosine recombinase XerS                |

|         |         |      |           |      |           |                 |     |                                       |
|---------|---------|------|-----------|------|-----------|-----------------|-----|---------------------------------------|
| 1074101 | 1074200 | 2.46 | 1.10E-04  | 2.08 | 1.61E-03  | <i>spd_1044</i> | 31  | DeoR family transcriptional regulator |
| 1174601 | 1174700 | 2.04 | 8.53E-13  | 2.11 | 1.83E-13  | <i>spd_1041</i> | 97  | uracil transporter                    |
| 1186601 | 1186700 | 1.97 | 1.80E-03  | 1.88 | 3.59E-03  | <i>spd_1157</i> | 286 | transposase                           |
| 1188701 | 1188800 | 4.35 | 7.17E-23  | 4.21 | 2.41E-21  | <i>spd_1159</i> | 45  | hypothetical protein                  |
| 1192301 | 1192400 | 2.07 | 3.38E-04  | 0.73 | 3.06E-01  | <i>spd_1164</i> | 64  | cytidine deaminase                    |
| 1207301 | 1207400 | 2.44 | 4.87E-04  | 2.55 | 2.78E-04  | <i>spd_1178</i> | 183 | prolyl oligopeptidase                 |
| 1231101 | 1231200 | 1.70 | 1.57E-11  | 2.06 | 1.76E-16  | <i>spd_1202</i> | 80  | LytR family transcriptional regulator |
| 1267401 | 1267500 | 3.24 | 2.28E-12  | 2.84 | 1.62E-09  | <i>spd_1236</i> | 43  | regulatory protein Spx                |
| 1282101 | 1282200 | 2.50 | 4.17E-05  | 2.07 | 1.09E-03  | <i>spd_1253</i> | 75  | transcriptional regulator             |
| 1282201 | 1282300 | 2.93 | 1.09E-05  | 2.59 | 1.47E-04  | <i>spd_1254</i> | 111 | ABC transporter permease              |
| 1282301 | 1282400 | 2.77 | 1.14E-04  | 1.32 | 1.08E-01  | <i>spd_1254</i> | 11  | ABC transporter permease              |
| 1283901 | 1284000 | 3.23 | 2.31E-07  | 3.52 | 1.32E-08  | <i>spd_1255</i> | 27  | ABC transporter ATP-binding protein   |
| 1287501 | 1287600 | 2.35 | 9.99E-05  | 2.51 | 3.04E-05  | <i>spd_1258</i> | 6   | restriction endonuclease              |
| 1287801 | 1287900 | 2.04 | 1.14E-11  | 2.25 | 5.08E-14  | <i>spd_1258</i> | 13  | restriction endonuclease              |
| 1289401 | 1289500 | 2.00 | 4.30E-10  | 1.91 | 3.17E-09  | <i>spd_1260</i> | 63  | site-specific DNA-methyltransferase   |
| 1289601 | 1289700 | 2.29 | 2.66E-04  | 2.05 | 1.46E-03  | <i>spd_1262</i> | 165 | AraC family transcriptional regulator |
| 1289701 | 1289800 | 2.90 | 5.45E-09  | 2.87 | 1.02E-08  | <i>spd_1262</i> | 65  | AraC family transcriptional regulator |
| 1357001 | 1357100 | 2.20 | 1.26E-03  | 1.33 | 7.78E-02  | <i>spd_1342</i> | 92  | IS30 family transposase               |
| 1421801 | 1421900 | 2.07 | 6.50E-05  | 1.53 | 5.29E-03  | <i>spd_1403</i> | 142 | 1,4-beta-N-acetylmuramidase           |
| 1455601 | 1455700 | 1.98 | 3.33E-07  | 1.83 | 3.48E-06  | <i>spd_1438</i> | 72  | cadmium resistance protein CadD       |
| 1468701 | 1468800 | 3.12 | 1.36E-10  | 3.25 | 1.98E-11  | <i>spd_1455</i> | 19  | hypothetical protein                  |
| 1548301 | 1548400 | 2.84 | 9.27E-08  | 2.93 | 3.85E-08  | <i>spd_1526</i> | 50  | membrane protein                      |
| 1548401 | 1548500 | 3.09 | 5.23E-26  | 2.95 | 1.08E-23  | <i>spd_1526</i> | 150 | membrane protein                      |
| 1586201 | 1586300 | 2.86 | 2.97E-10  | 2.52 | 5.63E-08  | <i>spd_1568</i> | 67  | NADPH-dependent reductase QueF        |
| 1604201 | 1604300 | 1.71 | 3.65E-02  | 2.37 | 2.55E-03  | <i>spd_1587</i> | 20  | aspartate aminotransferase            |
| 1619401 | 1619500 | 2.86 | 3.10E-29  | 2.18 | 6.86E-17  | <i>spd_1605</i> | 19  | LacI family transcriptional regulator |
| 1704801 | 1704900 | 5.05 | 3.50E-142 | 5.03 | 1.03E-140 | <i>spd_1703</i> | 62  | tRNA-Glu                              |
| 1730701 | 1730800 | 2.41 | 8.69E-09  | 2.10 | 8.94E-07  | <i>spd_1738</i> | 133 | MATE family efflux transporter        |
| 1750701 | 1750800 | 2.40 | 1.79E-03  | 1.96 | 1.42E-02  | <i>spd_1756</i> | 9   | hypothetical protein                  |
| 1750901 | 1751000 | 2.24 | 8.10E-05  | 1.69 | 4.73E-03  | <i>spd_1756</i> | 209 | hypothetical protein                  |
| 1759401 | 1759500 | 2.77 | 3.56E-05  | 2.72 | 5.98E-05  | <i>spd_1760</i> | 80  | tRNA-Cys                              |
| 1792101 | 1792200 | 2.13 | 1.60E-06  | 2.06 | 3.90E-06  | <i>spd_1798</i> | 94  | DNA-binding response regulator        |
| 1796001 | 1796100 | 3.85 | 1.82E-11  | 3.30 | 1.77E-08  | <i>spd_1803</i> | 2   | hypothetical protein                  |
| 1796101 | 1796200 | 1.95 | 1.57E-03  | 1.58 | 1.47E-02  | <i>spd_1803</i> | 102 | hypothetical protein                  |
| 1796201 | 1796300 | 2.16 | 2.25E-03  | 1.66 | 2.67E-02  | <i>spd_1803</i> | 202 | hypothetical protein                  |
| 1796301 | 1796400 | 4.86 | 1.18E-26  | 4.44 | 4.31E-22  | <i>spd_1804</i> | 187 | tRNA-Pro                              |
| 1796401 | 1796500 | 3.06 | 1.28E-19  | 2.59 | 4.31E-14  | <i>spd_1804</i> | 87  | tRNA-Pro                              |
| 1802301 | 1802400 | 3.04 | 2.51E-115 | 3.06 | 3.94E-117 | <i>spd_1816</i> | 40  | 16S ribosomal RNA                     |
| 1802401 | 1802500 | 6.43 | 3.40E-126 | 6.49 | 1.65E-128 | <i>spd_1817</i> | 13  | tRNA-Glu                              |
| 1813201 | 1813300 | 1.99 | 8.09E-04  | 1.93 | 1.42E-03  | <i>spd_1827</i> | 126 | C4-dicarboxylate ABC transporter      |
| 1813701 | 1813800 | 2.02 | 2.39E-03  | 2.22 | 7.76E-04  | <i>spd_1828</i> | 129 | ABC transporter ATP-binding protein   |

|         |         |      |           |      |           |                 |     |                                        |
|---------|---------|------|-----------|------|-----------|-----------------|-----|----------------------------------------|
| 1818701 | 1818800 | 3.44 | 1.36E-06  | 1.91 | 1.47E-02  | <i>spd_1833</i> | 380 | PTS cellobiose transporter subunit IIA |
| 1862401 | 1862500 | 5.12 | 4.12E-65  | 5.44 | 2.79E-73  | <i>spd_1891</i> | 9   | 23S ribosomal RNA                      |
| 1864201 | 1864300 | 2.55 | 1.28E-54  | 2.57 | 1.49E-55  | <i>spd_1893</i> | 15  | 16S ribosomal RNA                      |
| 1864301 | 1864400 | 5.36 | 8.93E-105 | 5.50 | 6.13E-110 | <i>spd_1894</i> | 38  | tRNA-Glu                               |
| 1902301 | 1902400 | 2.12 | 1.69E-09  | 2.50 | 7.41E-13  | <i>spd_1931</i> | 78  | membrane protein                       |
| 2006301 | 2006400 | 2.20 | 7.24E-08  | 3.71 | 4.63E-21  | <i>spd_2027</i> | 45  | hypothetical protein                   |
| 2046001 | 2046100 | 2.73 | 2.78E-04  | 1.76 | 3.07E-02  | <i>spd_2069</i> | 98  | chromosome segregation protein         |

Intergenic region between *ftsA* and upstream gene *spd\_1481* (1496852 to 1497071)

|         |         |      |          |      |           |                 |    |                            |
|---------|---------|------|----------|------|-----------|-----------------|----|----------------------------|
| 1496901 | 1497000 | 1.62 | 4.00E-02 | 1.19 | 1.614E-01 | <i>spd_1480</i> | 49 | cell division protein FtsA |
|---------|---------|------|----------|------|-----------|-----------------|----|----------------------------|

<sup>a</sup> RNA immunoprecipitation samples were prepared from three independent cultures of IU1945 (WT), IU9602 (*khpA*-L-F<sup>3</sup>) and IU10664 (*khpB*-L-F<sup>3</sup>) and sequencing (RIP-Seq) analyses were performed as described in Experimental procedures. Log<sub>2</sub>-fold ratios and P-adjust values are based on three independent biological replicates of IU9602 compared to IU1945 or IU10664 compared to IU1945. Complete RIP-Seq procedures and data are deposited in the GEO database (accession number GSE103735).

<sup>b</sup> mRNA and tRNA gene designations are based on the original published *Streptococcus pneumoniae* D39 sequences (<https://www.ncbi.nlm.nih.gov/nucore/116075884?report=genbank>) and an updated annotation (<https://www.ncbi.nlm.nih.gov/nucore/116515308>) that includes new gene designations prefixed with SPD\_RS. SPD\_RS genes that do not have corresponding *spd* numbers are followed by the two adjacent *spd* genes in parenthesis. Ratios of reads are obtained with reads covering the whole gene. Some RNAs show a log<sub>2</sub>ratio > 2 in one segment of the gene, but do not show an overall log<sub>2</sub>fold ratio of >2 in this analysis.

<sup>c</sup> Both tables S4A and S4B contain only mRNA, tRNA or 100-bp segments of intergenic regions with a log<sub>2</sub>-fold value > 2 and an P-adjust value < 0.01 for both IU9602 compared to IU1945, and IU10664 compared to IU1945.

<sup>d</sup> RNA or intergenic regions highlighted in yellow or orange show log<sub>2</sub>Fold ratio >2 and P-adjust values < 0.01 in the comparison of *khpA*-L-F<sup>3</sup> vs WT, but show log<sub>2</sub>Fold ratio <1 and P-adjust values > 0.01 in the comparison of *khpB*-L-F<sup>3</sup> vs WT, or vice versa. Regions highlighted in yellow represent genes downstream of *khpB*, or the intergenic region downstream of *khpA*. These increases are due to the inserted promoter of Pc-erm of the *khpA*-L-F<sup>3</sup> or *khpB*-L-F<sup>3</sup> strains.

<sup>e</sup> Intergenic regions highlighted in green overlapped with previous identified sRNA Spd-sr7 (820183 to 820245) or Spd-sr10 (1750985 to 1751149) (Tsui, H.C., D. Mukherjee, V.A. Ray, L.T. Sham, A.L. Feig & M.E. Winkler, (2010) Identification and characterization of noncoding small RNAs in *Streptococcus pneumoniae* serotype 2 strain D39. Journal of bacteriology 192: 264-279.)
